# Supplementary material
Source: PubMed Central journal article supplement (PMC3619155)
Supplement: Supp_Fig3.pdf [file Supp_Fig3.pdf]

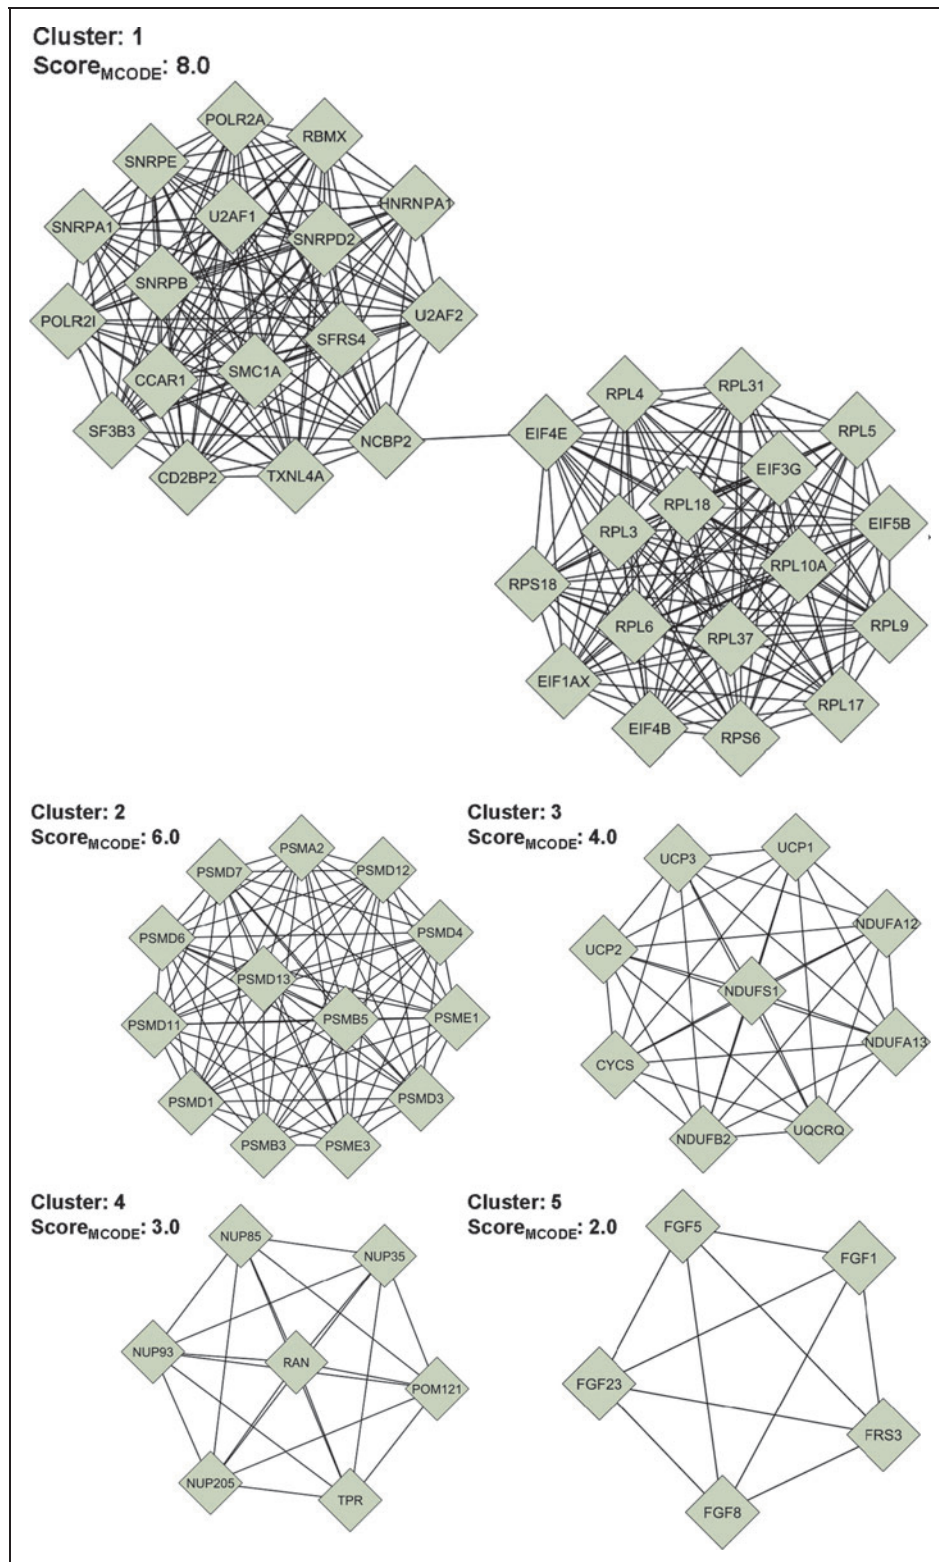

**Supplementary Fig. S3.** Top 11 highly interconnected gene clusters from the 1,252 nominated essential gene candidates. The cluster number and MCODE score is included. (*continued*)

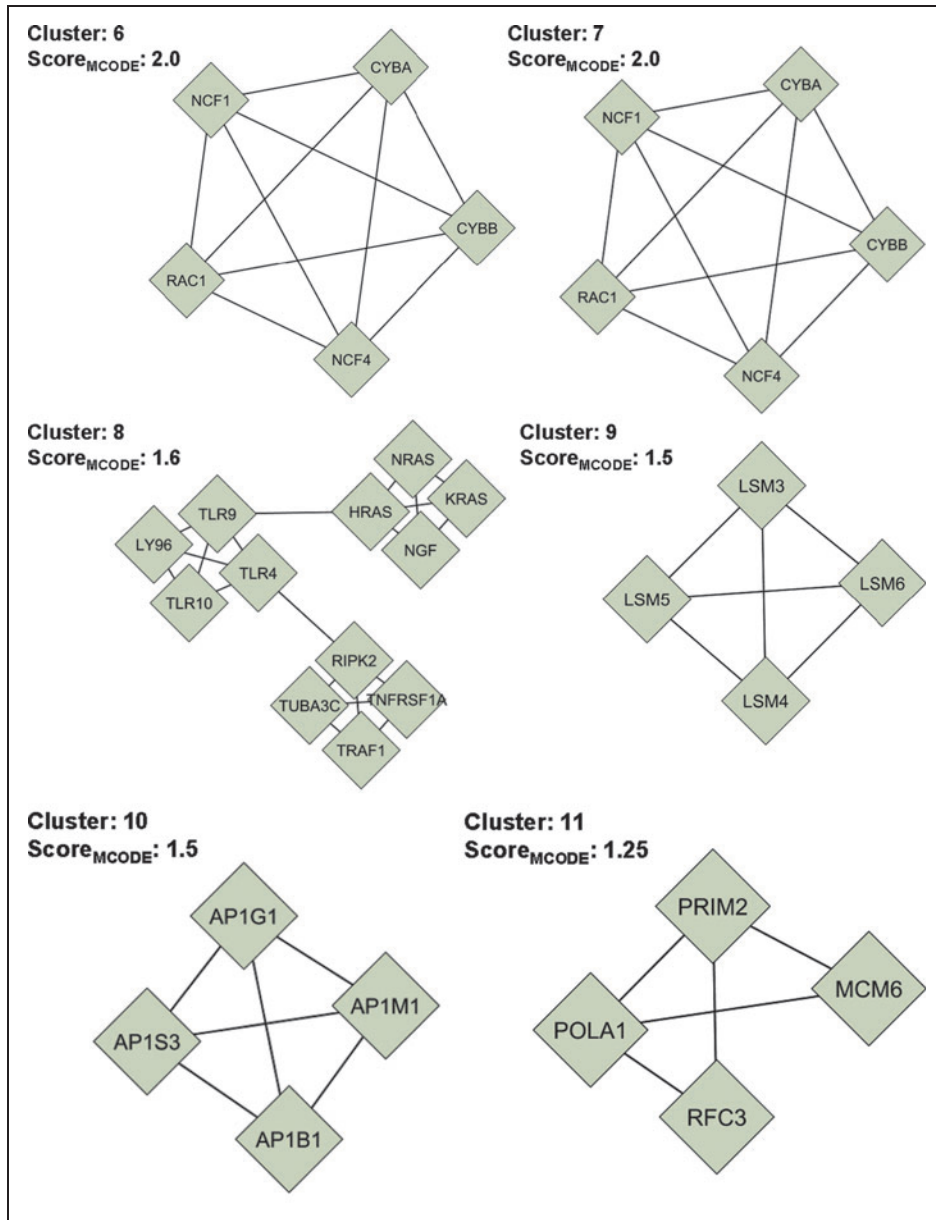

Supplementary Fig. S3. (Continued)
