# Supplementary material
Source: PubMed Central journal article supplement (PMC3619155)
Supplement: Supp_Table2.pdf [file Supp_Table2.pdf]

**Supplementary Table S2.** Off-target filtering in essential gene candidates reveals 91 HC\_OTEs and their re-scoring removes 16 corresponding genes. Seed heptamers are highlighted in red within the oligonucleotide sequence

| Gene     | Refseq ID | Supplier ID    | Oligonucleotide sequence                                                                 | Seed Freq <sub>HITS</sub> | Seed Freq <sub>LIB</sub> | p-value | miRNA matches   | %3'UTR | Gene removed |
|----------|-----------|----------------|------------------------------------------------------------------------------------------|---------------------------|--------------------------|---------|-----------------|--------|--------------|
| ARHGEF1  | NM_004706 | TRCN0000033565 | CCGGCATGGCAGAATGCCTGTTCTTCTCGAG<br>A <b>AGAACAG</b> GCATTCTGCCATGTTTTG                   | 4                         | 17                       | 0.026   | hsa-miR-4773    | 19     | ✓            |
| CD300LF  | NM_139018 | TRCN0000060563 | CCGGCCGTGCAGTGTGTTTACAGATCTCGAG<br>A <b>TCTGTAA</b> ACACACTGCACGGTTTTTG                  | 7                         | 23                       | 0.001   | hsa-miR-3686    | 15     | ✓            |
| CDC34    | NM_004359 | TRCN0000007301 | CCGGGAGTGTGATCTCCCTCCTGAACTCGA<br>GTT <b>CAGGAGG</b> AGATCACACTCTTTTT                    | 3                         | 8                        | 0.014   | hsa-miR-4779    | 25     | ✓            |
| CDC34    | NM_004359 | TRCN0000007300 | CCGGTCGGGAGTACACAGACATCATCTCGA<br>GAT <b>GATGCTCTG</b> TGTA <b>CTCCG</b> ATTTTT          | 4                         | 18                       | 0.031   | hsa-miR-654-3p  | 12     |              |
| DHX38    | NM_014003 | TRCN0000001171 | CCGGGCAGTGGGAAGAACAATAATTACTCGAG<br><b>TAATTATT</b> GTTCTTCCACTGCTTTTT                   | 3                         | 5                        | 0.003   | hsa-miR-944     | 26     | ✓            |
| HS3ST3B1 | NM_006041 | TRCN0000035817 | CCGGCAAGCACTTCTACTTCAACA <b>ACTCGAG</b><br><b>TTGTTGA</b> AGTAGAAGTCTTGT <b>TTTTG</b>    | 7                         | 37                       | 0.012   | hsa-miR-653     | 12     | ✓            |
| IFITM1   | NM_003641 | TRCN0000057500 | CCGGCTTCTTGA <b>ACTGGT</b> GCTGTCTCTCGAG<br>AG <b>CAGCACC</b> AGTTCAAGAAGTTTTTG          | 3                         | 12                       | 0.045   | hsa-miR-3065-3p | 15     | ✓            |
| KISS1    | NM_002256 | TRCN0000059065 | CCGGCCTGCCGA <b>ACTACA</b> ACTGGA <b>ACTCGA</b><br>GT <b>TCCAGTT</b> GTAGTTCGGCAGTTTTTG  | 5                         | 29                       | 0.045   | hsa-miR-145     | 13     | ✓            |
| KISS1    | NM_002256 | TRCN0000059064 | CCGGGCAGCTAGAATCCCTGGGCCTCTCGA<br>GAG <b>CCCAGGG</b> ATTCTAGCTGCTTTTTG                   | 2                         | 4                        | 0.026   | hsa-miR-1915    | 26     |              |
| LILRA2   | NM_006866 | TRCN0000056847 | CCGGCGACAGATTTGTTCTGTATA <b>ACTCGAG</b><br><b>TTATACAGA</b> ACAAATCTGTCGTTTTTG           | 4                         | 20                       | 0.044   | hsa-let-7f-2-3p | 13     | ✓            |
| MS4A1    | NM_021950 | TRCN0000061522 | CCGGCAGCATA <b>CAATCT</b> GTTCTTCTCGAG<br><b>AAGAACAG</b> AGATTGTATGCTGTTTTTG            | 4                         | 17                       | 0.026   | hsa-miR-4773    | 19     | ✓            |
| OLR1     | NM_002543 | TRCN0000060521 | CCGGGCAAACCTA <b>ACTCACC</b> AGAA <b>ACTCGAG</b><br>TTT <b>CTGGTGA</b> GTTAGTTTGTCTTTTTG | 4                         | 15                       | 0.016   | hsa-miR-4299    | 11     | ✓            |
| PRSS12   | NM_003619 | TRCN0000050978 | CCGGCGGCTTTGATTCTGTCTCA <b>ACTCGAG</b><br><b>TTGAGGAC</b> AGAATCAAAGCCGTTTTTG            | 4                         | 19                       | 0.037   | hsa-miR-1224-5p | 10     | ✓            |

|          |           |                |                                                                  |   |    |       |                                                                            |    |   |
|----------|-----------|----------------|------------------------------------------------------------------|---|----|-------|----------------------------------------------------------------------------|----|---|
| RAB13    | NM_002870 | TRCN0000048122 | CCGGCGAGAATATTCAGAACTGGATCTCGAG<br>ATCCAGTTCTGAATATTCTCGTTTTTG   | 5 | 29 | 0.045 | hsa-miR-145                                                                | 13 | ✓ |
| RAMP3    | NM_005856 | TRCN0000060982 | CCGGGAAGGCTTTCGCAGACATGATCTCGA<br>GATCATGTCTGCCAAAGCCTCTTTTTG    | 4 | 18 | 0.031 | hsa-miR-654-3p                                                             | 12 | ✓ |
| TGS1     | NM_024831 | TRCN0000060828 | CCGGGCTCGCAATAATGCAGAAGTTCTCGAG<br>AACTTCTGCAATTATTGCGAGCTTTTTG  | 7 | 36 | 0.010 | hsa-mir-544a                                                               | 17 | ✓ |
| UBOX5    | NM_014948 | TRCN0000004439 | CCGGCGGCGGTATCCCTTGTATCAACTCGA<br>GTTGATACAAGGATACCGCCGTTTTT     | 3 | 4  | 0.001 | hsa-miR-381,<br>hsa-miR-300                                                | 12 | ✓ |
| XAB2     | NM_020196 | TRCN0000074412 | CCGGGCAGTATGACATGTTCAACATCTCGAG<br>ATGTTGACATGTCATACTGCTTTTTG    | 7 | 37 | 0.012 | hsa-miR-653                                                                | 12 | ✓ |
| ABCB8    | NM_007188 | TRCN0000059876 | CCGGTCACGAGTTCATCACCAGTTTCTCGAG<br>AAACTGGTGATGAACTCGTATTTTTG    | 4 | 15 | 0.016 | hsa-miR-4299                                                               | 11 |   |
| ACYP1    | NM_001107 | TRCN0000050444 | CCGGCGACAAAGCAAACCTCAACAACCTCGAG<br>TTGTTGAAGTTTGCTTTGTCGTTTTTG  | 7 | 37 | 0.012 | hsa-miR-653                                                                | 12 |   |
| ANKH     | NM_054027 | TRCN0000059324 | CCGGCCTGGGCTACTACAAGAACATCTCGA<br>GATGTTCTTGTAGTAGCCAGTTTTTG     | 5 | 26 | 0.030 | hsa-miR-578                                                                | 14 |   |
| ANTXR1   | NM_018153 | TRCN0000063220 | CCGGCAAGGCATCATCCACTCAATTCTCGAG<br>AATGAGTGGATGATGCCTTGTTTTTG    | 2 | 5  | 0.041 | hsa-miR-4758-5p                                                            | 10 |   |
| ARL9     | NM_206919 | TRCN0000065293 | CCGGGCAGCCTATCACATTACAGATCTCGAG<br>ATCTGTAATGTGATAGGCTGCTTTTTG   | 7 | 23 | 0.001 | hsa-miR-3686                                                               | 15 |   |
| C19ORF61 | NM_019108 | TRCN0000061848 | CCGGCCTAGTCTTCTTGCAAGAACAACCTCGAG<br>TTGTTCTGCAAGAAGACTAGGTTTTTG | 7 | 36 | 0.010 | hsa-mir-544a                                                               | 17 |   |
| CCDC76   | NM_019083 | TRCN0000062719 | CCGGGCATTGTTATTGCACTCTGTTCTCGAG<br>AACAGAGTGCAATAACAATGCTTTTTG   | 3 | 10 | 0.027 | hsa-miR-4797-5p                                                            | 16 |   |
| CD2BP2   | NM_006110 | TRCN0000057487 | CCGGGTGTACCAGGAAACAAGGGAACCTCGA<br>GTCCCTTGTTCCTGGTACACTTTTTG    | 3 | 9  | 0.020 | hsa-miR-623                                                                | 10 |   |
| CD300C   | NM_006678 | TRCN0000062982 | CCGGGCACCTCAGGTCCTCCCACGACTCGA<br>GTCGTGGGAGGACCTGAGGTGCTTTTTG   | 3 | 5  | 0.003 | hsa-miR-30b-3p,<br>hsa-miR-3689a-3p,<br>hsa-miR-3689b-3p,<br>hsa-miR-3689c | 35 |   |
| CDCA4    | NM_145701 | TRCN0000072627 | CCGGGCTTGAAGACAGTGTCTCATCTCGAG<br>ATGAGGACACTGTCTTCAAGCTTTTTG    | 4 | 19 | 0.037 | hsa-miR-1224-5p                                                            | 10 |   |

|         |           |                |                                                                          |   |    |       |                               |    |  |
|---------|-----------|----------------|--------------------------------------------------------------------------|---|----|-------|-------------------------------|----|--|
| CDK10   | NM_003674 | TRCN000000689  | CCGGCTACAACAACCTGAAGCACAACCTCGAG<br>TTG <b>TGCTTCAG</b> GGTTGTGTAGTTTTT  | 5 | 27 | 0.035 | hsa-miR-218-5p                | 14 |  |
| CTHRC1  | NM_138455 | TRCN0000062247 | CCGGGTGAAGGAATTGGTGTGGATCTCGA<br>GATC <b>CAGCACCA</b> AATTCCCTTCACTTTTTG | 3 | 12 | 0.045 | hsa-miR-3065-3p               | 15 |  |
| CYBB    | NM_000397 | TRCN0000064589 | CCGGCTTGGCTGAAACCCTGAGTAACTCGA<br>GTTA <b>CTCAGGG</b> TTTCAGCCAAGTTTTTG  | 2 | 5  | 0.041 | hsa-miR-1266,<br>hsa-miR-4518 | 17 |  |
| CYP11A1 | NM_000781 | TRCN0000064276 | CCGGGCTGAGCAAAGACAAGAACATCTCGA<br>GATG <b>TTCTTGT</b> CTTTGCTCAGCTTTTTG  | 5 | 26 | 0.030 | hsa-miR-578                   | 14 |  |
| CYP2E1  | NM_000773 | TRCN0000064174 | CCGGGCTCCAGCTTTACAATAATTTCTCGAG<br><b>AAATTATT</b> GTAAGCTGGAGCTTTTTG    | 3 | 5  | 0.003 | hsa-miR-944                   | 26 |  |
| CYP2F1  | NM_000774 | TRCN0000064190 | CCGGCGATGTCATCACCTCCTTAACTCGAG<br>TTA <b>AGGAGGG</b> TGATGACATCGTTTTTG   | 3 | 8  | 0.014 | hsa-miR-4779                  | 25 |  |
| CYP2R1  | NM_024514 | TRCN0000064501 | CCGGGCCTCAGTCTTCTTGATAATCTCGAG<br>ATT <b>ATACAAG</b> AAGACTGAGGCTTTTTG   | 3 | 4  | 0.001 | hsa-miR-381,<br>hsa-miR-300   | 12 |  |
| DERL1   | NM_024295 | TRCN0000062913 | CCGGCCTGCTATTTACCCTGGTTACTCGAG<br>TAA <b>CCCAGGG</b> TAAATAGCAGGTTTTTG   | 2 | 4  | 0.026 | hsa-miR-1915                  | 26 |  |
| DNAJC16 | XM_497656 | TRCN0000064151 | CCGGCCACATGAATGTGGTCCTCATCTCGAG<br>AT <b>GAGGACC</b> CACATTCATGTGGTTTTTG | 4 | 19 | 0.037 | hsa-miR-1224-5p               | 10 |  |
| DOCK5   | NM_024940 | TRCN0000113804 | CCGGGCGACTAATAGCATTACAGATCTCGAG<br>AT <b>TCTGTA</b> TGCTATTAGTCGCTTTTTTG | 7 | 23 | 0.001 | hsa-miR-3686                  | 15 |  |
| DSCAM   | NM_001389 | TRCN0000063989 | CCGGCCTCATACTTTGCCTCCATACTCGAG<br>TAT <b>GGAGGCA</b> AATGTATGAGGTTTTTG   | 2 | 5  | 0.041 | hsa-miR-650,<br>hsa-miR-3612  | 21 |  |
| DYNLT1  | NM_006519 | TRCN0000062181 | CCGGCTGTGTAATTATGCAGAAGAACTCGAG<br>TTC <b>TTCTGCA</b> TAATTACACAGTTTTTG  | 7 | 36 | 0.010 | hsa-mir-544a                  | 17 |  |
| EIF4A3  | NM_014740 | TRCN0000061857 | CCGGGCAGTACTATTCCACTCAGATCTCGAG<br>ATC <b>TGAGTGG</b> AATAGTACTGCTTTTTTG | 2 | 5  | 0.041 | hsa-miR-4758-5p               | 10 |  |
| EIF4B   | NM_001417 | TRCN0000062602 | CCGGCTACCCATGATGTTACAGAAGAACTCGAG<br><b>TTCTGTA</b> CATCATAGGGTAGTTTTTG  | 7 | 23 | 0.001 | hsa-miR-3686                  | 15 |  |
| ENC1    | NM_003633 | TRCN0000063900 | CCGGCGAGTCTGCAATTAAGTGGATCTCGAG<br>AT <b>TCCAGTT</b> AATTGCAGACTCGTTTTTG | 5 | 29 | 0.045 | hsa-miR-145                   | 13 |  |

|         |           |                |                                                                          |   |    |       |                                 |    |  |
|---------|-----------|----------------|--------------------------------------------------------------------------|---|----|-------|---------------------------------|----|--|
| FCRLA   | NM_032738 | TRCN0000060517 | CCGGGACTTGACTGATGCAAGGGAAGCTCGA<br>GT <b>TCCTTGC</b> CATCAGTCAAGTCTTTTTG | 3 | 9  | 0.020 | hsa-miR-623                     | 10 |  |
| FGF22   | NM_020637 | TRCN0000058600 | CCGGCTCAGGCTTCTACGTGGCCATCTCGA<br>GAT <b>GGCCACG</b> TAGAAGCCTGAGTTTTG   | 2 | 5  | 0.041 | hsa-miR-588,<br>hsa-miR-4701-5p | 13 |  |
| FKBP3   | NM_002013 | TRCN0000063541 | CCGGGATTCGTTTCTTGCAGAACATCTCGAG<br>ATG <b>TTCTGCA</b> AGAAACGAATCTTTTTG  | 7 | 36 | 0.010 | hsa-mir-544a                    | 17 |  |
| GDF2    | NM_016204 | TRCN0000058366 | CCGGGCACATCTTGCTCTTCAACATCTCGAG<br>A <b>TGTTGA</b> AGAGCAAGATGTGCTTTTTG  | 7 | 37 | 0.012 | hsa-miR-653                     | 12 |  |
| GFOD2   | NM_030819 | TRCN0000064370 | CCGGAGTGACACTCAACTTCAACATCTCGAG<br>A <b>TGTTGA</b> AGTTGAGTGTCACTTTTTG   | 7 | 37 | 0.012 | hsa-miR-653                     | 12 |  |
| HYLS1   | NM_145014 | TRCN0000072619 | CCGGCCCAATCCAAACCTCAGCATACTCGAG<br><b>TATGCTG</b> AGGTTTGGATTGGGTTTTG    | 4 | 15 | 0.016 | hsa-miR-4728-3p                 | 13 |  |
| IFT57   | NM_018010 | TRCN0000063012 | CCGGGCAGAAGATGATGCAGAATTACTCGA<br>GTAA <b>TTCTGCA</b> TTCATCTTCTGCTTTTTG | 7 | 36 | 0.010 | hsa-mir-544a                    | 17 |  |
| IGSF10  | NM_178822 | TRCN0000144401 | CCGGCAGGCGTATATCACTGTATAACTCGAG<br><b>TTATACAG</b> TGATATACGCCTGTTTTTTG  | 4 | 20 | 0.044 | hsa-let-7f-2-3p                 | 13 |  |
| IL12RB2 | NM_001559 | TRCN0000058159 | CCGGCCTGGGTAACCTAAGCACAACTCGA<br>GT <b>TGTGCTT</b> AGAGTTACCCAGGTTTTTG   | 5 | 27 | 0.035 | hsa-miR-218-5p                  | 14 |  |
| IL18BP  | NM_005699 | TRCN0000058633 | CCGGCTGCCTCAGTTAGAAGCACAACTCGA<br>GT <b>TGTGCTT</b> CTAACTGAGGCAGTTTTTG  | 5 | 27 | 0.035 | hsa-miR-218-5p                  | 14 |  |
| IL1R2   | NM_004633 | TRCN0000058530 | CCGGTGTCCATAATACCCTGAGTTTCTCGAG<br>AAA <b>CTCAGGG</b> TATTATGGACATTTTTG  | 2 | 5  | 0.041 | hsa-miR-1266,<br>hsa-miR-4518   | 17 |  |
| IL1RAP  | NM_002182 | TRCN0000058540 | CCGGCCCAGTGCATAAACTGTATATCTCGAG<br>A <b>TATACAG</b> TTTATGCACTGGGTTTTTG  | 4 | 20 | 0.044 | hsa-let-7f-2-3p                 | 13 |  |
| IL4     | NM_000589 | TRCN0000058183 | CCGGGTTGACCGTAACAGACATCTTCTCGAG<br>AAG <b>ATGTCTG</b> TTCACGGTCAACTTTTTG | 4 | 18 | 0.031 | hsa-miR-654-3p                  | 12 |  |
| INHA    | NM_002191 | TRCN0000063903 | CCGGGCAGCACTGTGCTTGTATCTACTCGAG<br>TAG <b>ATACAAG</b> CACAGTGCTGCTTTTTG  | 3 | 4  | 0.001 | hsa-miR-381,<br>hsa-miR-300     | 12 |  |
| KDELR1  | NM_006801 | TRCN0000063251 | CCGGGCTCTATCTTCAACTGGATCTCGAG<br>A <b>TCCAGTT</b> GAAGAGATAGAGCTTTTTG    | 5 | 29 | 0.045 | hsa-miR-145                     | 13 |  |

|        |              |                |                                                                                 |   |    |       |                                                                            |    |  |
|--------|--------------|----------------|---------------------------------------------------------------------------------|---|----|-------|----------------------------------------------------------------------------|----|--|
| KLHL2  | NM_007246    | TRCN0000064967 | CCGGGCAGAAATTCAGGTTACAGAACTCGA<br>GT <b>TCTGTA</b> ACCTGAATTTCTGCTTTTTG         | 7 | 23 | 0.001 | hsa-miR-3686                                                               | 15 |  |
| LCP1   | NM_002298    | TRCN0000056493 | CCGGGCGGACATTTAGGAACTGGATCTCGA<br>GAT <b>CCAGTT</b> CCTAAATGTCCGCTTTTTG         | 5 | 29 | 0.045 | hsa-miR-145                                                                | 13 |  |
| LENG8  | NM_052925    | TRCN0000061690 | CCGGTGGAGGTCTCAAGTTCAACATCTCGAG<br>AT <b>GTTGAA</b> CTTGAGACCTCCATTTTTG         | 7 | 37 | 0.012 | hsa-miR-653                                                                | 12 |  |
| LILRA4 | NM_012276    | TRCN0000060560 | CCGGCTACATCAGATACACTCTGTA <b>CTCGAG</b><br><b>TACAGAGT</b> GTATCTGATGTAGTTTTTG  | 3 | 10 | 0.027 | hsa-miR-4797-5p                                                            | 16 |  |
| LILRP2 | NM_024317    | TRCN0000060449 | CCGGCTATGACAAATTC <b>ACTCTGTA</b> CTCGAG<br><b>TACAGAGT</b> GAATTTGTCATAGTTTTTG | 3 | 10 | 0.027 | hsa-miR-4797-5p                                                            | 16 |  |
| LSAMP  | NM_002338    | TRCN0000063937 | CCGGCTGTGAACTATCCTCC <b>ACTACTCGAG</b><br>TAG <b>TGGGAGG</b> ATAGTTCACAGTTTTTG  | 3 | 5  | 0.003 | hsa-miR-30b-3p,<br>hsa-miR-3689a-3p,<br>hsa-miR-3689b-3p,<br>hsa-miR-3689c | 35 |  |
| LYRM1  | NM_020424    | TRCN0000064101 | CCGGGCCAATTCATCTGCCTCCAATCTCGAG<br>ATT <b>GGAGGCA</b> GATGAATTGGCTTTTTG         | 2 | 5  | 0.041 | hsa-miR-650,<br>hsa-miR-3612                                               | 21 |  |
| MS4A3  | NM_006138    | TRCN0000061661 | CCGGCCATAAATGGATCACCAGATTCTCGAG<br>AAT <b>CTGGTGAT</b> CCATTTATGGTTTTTG         | 4 | 15 | 0.016 | hsa-miR-4299                                                               | 11 |  |
| MYO18A | NM_078471    | TRCN0000034202 | CCGGCGAATTGATGAAGAAGCACAACTCGA<br>GT <b>TGTGCTT</b> CTTCATCAATTCGTTTTTG         | 5 | 27 | 0.035 | hsa-miR-218-5p                                                             | 14 |  |
| NDUFB2 | NM_004546    | TRCN0000064766 | CCGGGAATTAGGTATCCCTCCTGATCTCGAG<br>ATC <b>AGGAGGG</b> ATACCTAATTCTTTTTG         | 3 | 8  | 0.014 | hsa-miR-4779                                                               | 25 |  |
| NEURL  | NM_004210    | TRCN0000034224 | CCGGCTCGGCTGTTATGCTGTTCTTCTCGAG<br>A <b>AGAACAG</b> CATAACAGCCGAGTTTTTG         | 4 | 17 | 0.026 | hsa-miR-4773                                                               | 19 |  |
| NGF    | NM_002506    | TRCN0000058404 | CCGGACTGGACTAAACTTCAGCATTCTCGAG<br>AAT <b>GCTGA</b> AGTTTAGTCCAGTTTTTTG         | 4 | 15 | 0.016 | hsa-miR-4728-3p                                                            | 13 |  |
| OR10X1 | NM_001004477 | TRCN0000061217 | CCGGCACAGGTTGTAGCTTACAGATCTCGAG<br>AT <b>TCTGTA</b> AGCTACAACCTGTGTTTTTG        | 7 | 23 | 0.001 | hsa-miR-3686                                                               | 15 |  |
| OR13A1 | NM_001004297 | TRCN0000062955 | CCGGCCTCACAGGTAATGTCCTCATCTCGAG<br>AT <b>GAGGAC</b> ATTACCTGTGAGGTTTTTG         | 4 | 19 | 0.037 | hsa-miR-1224-5p                                                            | 10 |  |
| OR2T27 | NM_001001824 | TRCN0000061596 | CCGGCCTCAGGGACATCCTGTATATCTCGAG<br>AT <b>ATACAG</b> GATGTCCCTGAGGTTTTTG         | 4 | 20 | 0.044 | hsa-let-7f-2-3p                                                            | 13 |  |

|          |              |                |                                                                  |   |    |       |                                                                            |    |  |
|----------|--------------|----------------|------------------------------------------------------------------|---|----|-------|----------------------------------------------------------------------------|----|--|
| OR51D1   | NM_001004751 | TRCN0000060717 | CCGGCCAGGAGATCGAGTTCAACATCTCGA<br>GATGTTGAACTCGATCTCTGGTTTTTG    | 7 | 37 | 0.012 | hsa-miR-653                                                                | 12 |  |
| OSMR     | NM_003999    | TRCN0000058683 | CCGGGCACTCCATAAGGAATAATTTCTCGAG<br>AAATTATTCCTTATGGAGTGCTTTTTG   | 3 | 5  | 0.003 | hsa-miR-944                                                                | 26 |  |
| PAFAH1B1 | NM_000430    | TRCN0000050964 | CCGGCGTATGGGATTACAAGAACAACCTCGA<br>GTTGTTCTTGTAAATCCCATACGTTTTTG | 5 | 26 | 0.030 | hsa-miR-578                                                                | 14 |  |
| PDE5A    | NM_001083    | TRCN0000048746 | CCGGCCTCGGTTCAATGCAGAAGTTCTCGAG<br>AACTTCTGCAATTGAACCGAGGTTTTTG  | 7 | 36 | 0.010 | hsa-mir-544a                                                               | 17 |  |
| PNN      | NM_002687    | TRCN0000072280 | CCGGCGCATCGAATTTGCAGAACAACCTCGAG<br>TTGTTCTGCAAAATTCGATGCGTTTTTG | 7 | 36 | 0.010 | hsa-mir-544a                                                               | 17 |  |
| PNRC1    | NM_006813    | TRCN0000063279 | CCGGGCATTTGAAGAAATCAGCATTCTCGAG<br>AATGCTGATTTCTCAAATGCTTTTTG    | 4 | 15 | 0.016 | hsa-miR-4728-3p                                                            | 13 |  |
| PROM1    | NM_006017    | TRCN0000062143 | CCGGCCCAACATCATCCCTGTTCTTCTCGAG<br>AAGAACAGGGATGATGTTGGGTTTTTG   | 4 | 17 | 0.026 | hsa-miR-4773                                                               | 19 |  |
| PSMD3    | NM_002809    | TRCN0000058122 | CCGGCCATGAGGTTTCCTCCCAAATCTCGAG<br>ATTGGGAGGAAACCTCATGTTTTTG     | 3 | 5  | 0.003 | hsa-miR-30b-3p,<br>hsa-miR-3689a-3p,<br>hsa-miR-3689b-3p,<br>hsa-miR-3689c | 35 |  |
| RARRES1  | NM_002888    | TRCN0000063373 | CCGGCCCTTGAAATAGTCAGCATACTCGAG<br>TATGCTGACTATTTCCAAGGTTTTTG     | 4 | 15 | 0.016 | hsa-miR-4728-3p                                                            | 13 |  |
| RBP5     | NM_031491    | TRCN0000059911 | CCGGCTGGAAGTACTGCAAGGGATCTCGA<br>GATCCCTTGACAGTCAGTCCAGTTTTTG    | 3 | 9  | 0.020 | hsa-miR-623                                                                | 10 |  |
| SEMA6D   | NM_020858    | TRCN0000063212 | CCGGGCAGTCTATTACAGACATAATCTCGAG<br>ATTATGCTGTAATAGACTGCTTTTTG    | 4 | 18 | 0.031 | hsa-miR-654-3p                                                             | 12 |  |
| SORL1    | NM_003105    | TRCN0000062949 | CCGGGCTGCTAGTAACTTTACAGAAGTCTCGAG<br>TTCTGTAAGTTACTAGCAGCTTTTTG  | 7 | 23 | 0.001 | hsa-miR-3686                                                               | 15 |  |
| SOX30    | NM_007017    | TRCN0000017424 | CCGGCCCTATTACGATGAAGCACAACTCGAG<br>TTGTGCTTCATCGTAATAGGTTTTT     | 5 | 27 | 0.035 | hsa-miR-218-5p                                                             | 14 |  |
| TNFRSF25 | NM_003790    | TRCN0000058512 | CCGGCGGTGACTTCCACAAGAAGATCTCGA<br>GATCTTCTTGTGGAAGTCACCGTTTTTG   | 5 | 26 | 0.030 | hsa-miR-578                                                                | 14 |  |
| TUBA4A   | NM_006000    | TRCN0000072401 | CCGGTCTGTGAACTGGTGTGGAAGTCTCGA<br>GTTCCAGCACCAGTTTCACAGTTTTTG    | 3 | 12 | 0.045 | hsa-miR-3065-3p                                                            | 15 |  |

|        |           |                |                                                                          |   |    |       |                                 |    |  |
|--------|-----------|----------------|--------------------------------------------------------------------------|---|----|-------|---------------------------------|----|--|
| TXN2   | NM_012473 | TRCN0000064199 | CCGGGTTAGAGAAGATGGTGGCCAACTCGA<br>GT <b>TGGCCACC</b> CATCTTCTCTAACTTTTTG | 2 | 5  | 0.041 | hsa-miR-588,<br>hsa-miR-4701-5p | 13 |  |
| VPS26A | NM_004896 | TRCN0000065140 | CCGGGATCTTATTGTTCAACCAGCTTCTCGAG<br>AAG <b>CTGGTGA</b> ACAATAAGATCTTTTTG | 4 | 15 | 0.016 | hsa-miR-4299                    | 11 |  |
| VPS26B | NM_052875 | TRCN0000065273 | CCGGGCGGGACATCAACAAGAAGTTCTCGA<br>GAACT <b>TCTTGT</b> TGATGTCCCGCTTTTTG  | 5 | 26 | 0.030 | hsa-miR-578                     | 14 |  |
