# Supplementary material
Source: PubMed Central journal article supplement (PMC3619155)
Supplement: Supp_Table3.pdf [file Supp_Table3.pdf]

**Supplementary Table S3.** List of the 1,252 nominated essential gene candidates

| Gene     | Refseq ID    | Description                                                                                   | H score | Qualified by H score | p-val |
|----------|--------------|-----------------------------------------------------------------------------------------------|---------|----------------------|-------|
| AADACL1  | NM_020792    | arylacetamide deacetylase-like 1                                                              | 100     | ✓                    |       |
| ABCB1    | NM_000927    | ATP-binding cassette, sub-family B (MDR/TAP), member 1                                        | 100     | ✓                    |       |
| ABCB5    | NM_178559    | ATP-binding cassette, sub-family B (MDR/TAP), member 5                                        | 100     | ✓                    |       |
| ABCB7    | NM_004299    | ATP-binding cassette, sub-family B (MDR/TAP), member 7                                        | 100     | ✓                    |       |
| ABCB8    | NM_007188    | ATP-binding cassette, sub-family B, member 8                                                  | 80      | ✓                    |       |
| ABCC1    | NM_004996    | ATP-binding cassette, sub-family C (CFTR/MRP), member 1                                       | 60      | ✓                    |       |
| ABCC10   | NM_033450    | ATP-binding cassette, sub-family C (CFTR/MRP), member 10                                      | 100     | ✓                    |       |
| ABCC11   | NM_032583    | ATP-binding cassette, sub-family C (CFTR/MRP), member 11                                      | 100     | ✓                    |       |
| ABCC13   | NM_138726    | ATP-binding cassette, sub-family C (CFTR/MRP), member 13                                      | 100     | ✓                    |       |
| ABCC8    | NM_000352    | ATP-binding cassette, sub-family C (CFTR/MRP), member 8                                       | 100     | ✓                    |       |
| ABCD2    | NM_005164    | ATP-binding cassette, sub-family D (ALD), member 2                                            | 100     | ✓                    |       |
| ABCD3    | NM_002858    | ATP-binding cassette, sub-family D (ALD), member 3                                            | 100     | ✓                    |       |
| ABCG8    | NM_022437    | ATP-binding cassette, sub-family G (WHITE), member 8                                          | 80      | ✓                    |       |
| ABHD3    | NM_138340    | abhydrolase domain containing 3                                                               | 100     | ✓                    |       |
| ABLIM1   | NM_002313    | actin binding LIM protein 1                                                                   | 100     | ✓                    |       |
| ACF      | NM_138933    | apobec-1 complementation factor                                                               | 100     | ✓                    |       |
| ACP5     | NM_001611    | acid phosphatase 5, tartrate resistant                                                        | 60      | ✓                    |       |
| ACTL6A   | NM_177989    | actin-like 6A                                                                                 | 100     | ✓                    |       |
| ACYP1    | NM_001107    | acylphosphatase 1, erythrocyte (common) type                                                  | 60      | ✓                    |       |
| ADAMDEC1 | NM_014479    | ADAM-like, decysin 1                                                                          | 100     | ✓                    |       |
| ADAMTS4  | NM_005099    | ADAM metallopeptidase with thrombospondin type 1 motif                                        | 80      | ✓                    |       |
| ADIPOR1  | NM_015999    | adiponectin receptor 1                                                                        | 100     | ✓                    |       |
| ADORA2B  | NM_000676    | adenosine A2b receptor                                                                        | 100     | ✓                    |       |
| AFM      | NM_001133    | afamin                                                                                        | 80      | ✓                    |       |
| AGER     | NM_001136    | advanced glycosylation end product-specific receptor                                          | 100     | ✓                    |       |
| AGPAT1   | NM_006411    | 1-acylglycerol-3-phosphate O-acyltransferase 1 (lysophosphatidic acid acyltransferase, alpha) | 80      | ✓                    |       |
| AGPAT2   | NM_006412    | 1-acylglycerol-3-phosphate O-acyltransferase 2 (lysophosphatidic acid acyltransferase, beta)  | 60      | ✓                    |       |
| AGTRAP   | NM_020350    | angiotensin II receptor-associated protein                                                    | 80      | ✓                    |       |
| AIFL     | NM_144704    | apoptosis-inducing factor like                                                                | 100     | ✓                    |       |
| AIFM1    | NM_004208    | apoptosis-inducing factor, mitochondrion-associated, 1                                        | 100     | ✓                    |       |
| AIFM2    | NM_032797    | apoptosis-inducing factor, mitochondrion-associated, 2                                        | 100     | ✓                    |       |
| ALB      | NM_000477    | albumin (ALB)                                                                                 | 100     | ✓                    |       |
| ALDH16A1 | NM_153329    | aldehyde dehydrogenase 16 family, member A1                                                   | 100     | ✓                    |       |
| ALF      | NM_006872    | TFIIA-alpha/beta-like factor                                                                  | 100     | ✓                    |       |
| ALG8     | NM_024079    | asparagine-linked glycosylation 8 homolog (yeast, alpha-1,3-glucosyltransferase)              | 80      | ✓                    |       |
| ALKBH2   | NM_001001655 | alkB, alkylation repair homolog 2                                                             | 100     | ✓                    |       |
| ALKBH3   | NM_139178    | alkB, alkylation repair homolog 3                                                             | 100     | ✓                    |       |
| ALOXE3   | NM_021628    | arachidonate lipoxygenase 3                                                                   | 80      | ✓                    |       |
| ANK2     | NM_001148    | ankyrin 2, neuronal                                                                           | 100     | ✓                    |       |
| ANKFY1   | NM_020740    | ankyrin repeat and FYVE domain containing 1                                                   | 100     | ✓                    |       |
| ANKH     | NM_054027    | ankylosis, progressive homolog                                                                | 80      | ✓                    |       |
| ANKRD37  | NM_181726    | ankyrin repeat domain 37                                                                      | 100     | ✓                    |       |

|         |           |                                                                                        |     |   |  |
|---------|-----------|----------------------------------------------------------------------------------------|-----|---|--|
| ANKRD49 | NM_017704 | ankyrin repeat domain 49                                                               | 60  | ✓ |  |
| ANTXR1  | NM_018153 | anthrax toxin receptor 1                                                               | 80  | ✓ |  |
| ANTXR2  | NM_058172 | anthrax toxin receptor 2                                                               | 100 | ✓ |  |
| AP1B1   | NM_001127 | adaptor-related protein complex 1, beta 1 subunit                                      | 100 | ✓ |  |
| AP1G1   | NM_001128 | adaptor-related protein complex 1, gamma 1 subunit                                     | 100 | ✓ |  |
| AP1G2   | NM_003917 | adaptor-related protein complex 1, gamma 2 subunit                                     | 100 | ✓ |  |
| AP1M1   | NM_032493 | adaptor-related protein complex 1, mu 1 subunit                                        | 100 | ✓ |  |
| AP1S3   | NM_178814 | adaptor-related protein complex 1, sigma 3 subunit                                     | 80  | ✓ |  |
| AP2A1   | NM_014203 | adaptor-related protein complex 2, alpha 1 subunit                                     | 100 | ✓ |  |
| AP2A2   | NM_012305 | adaptor-related protein complex 2, alpha 2 subunit                                     | 100 | ✓ |  |
| AP3B1   | NM_003664 | adaptor-related protein complex 3, beta 1 subunit                                      | 100 | ✓ |  |
| AP3D1   | NM_003938 | adaptor-related protein complex 3, delta 1 subunit                                     | 100 | ✓ |  |
| AP3M1   | NM_012095 | adaptor-related protein complex 3, mu 1 subunit                                        | 100 | ✓ |  |
| AP3M2   | NM_006803 | adaptor-related protein complex 3, mu 2 subunit                                        | 100 | ✓ |  |
| APBB1IP | NM_019043 | amyloid beta (A4) precursor protein-binding, family B, member 1 interacting protein    | 100 | ✓ |  |
| API5    | NM_006595 | apoptosis inhibitor 5                                                                  | 100 | ✓ |  |
| APOB    | NM_000384 | apolipoprotein B                                                                       | 100 | ✓ |  |
| APOM    | NM_019101 | apolipoprotein M                                                                       | 100 | ✓ |  |
| APOO    | NM_024122 | apolipoprotein O                                                                       | 80  | ✓ |  |
| APPBP2  | NM_006380 | amyloid beta precursor protein (cytoplasmic tail) binding protein 2                    | 100 | ✓ |  |
| AQP2    | NM_000486 | aquaporin 2 (collecting duct)                                                          | 60  | ✓ |  |
| AQP5    | NM_001651 | aquaporin 5                                                                            | 100 | ✓ |  |
| AQP8    | NM_001169 | aquaporin 8                                                                            | 80  | ✓ |  |
| ARCN1   | NM_001655 | archain 1                                                                              | 60  | ✓ |  |
| ARD1A   | NM_003491 | ARD1 homolog A, N-acetyltransferase                                                    | 100 | ✓ |  |
| ARFIP2  | NM_012402 | ADP-ribosylation factor interacting protein 2                                          | 100 | ✓ |  |
| ARHGEF9 | XM_377014 | Cdc42 guanine nucleotide exchange factor 9                                             | 60  | ✓ |  |
| ARL13B  | NM_182896 | ADP-ribosylation factor-like 13B                                                       | 100 | ✓ |  |
| ARL9    | NM_206919 | ADP-ribosylation factor-like 9                                                         | 80  | ✓ |  |
| ASGR2   | NM_001181 | asialoglycoprotein receptor 2                                                          | 80  | ✓ |  |
| ATIC    | NM_004044 | 5-aminoimidazole-4-carboxamide ribonucleotide formyltransferase/IMP cyclohydrolase     | 60  | ✓ |  |
| ATP4A   | NM_000704 | ATPase, H <sup>+</sup> /K <sup>+</sup> exchanging, alpha polypeptide                   | 75  | ✓ |  |
| ATRN    | NM_012070 | attractin                                                                              | 80  | ✓ |  |
| ATRNL1  | NM_207303 | attractin-like 1                                                                       | 100 | ✓ |  |
| AUP1    | NM_012103 | ancient ubiquitous protein 1                                                           | 60  | ✓ |  |
| B3GAT3  | NM_012200 | beta-1,3-glucuronyltransferase 3 (glucuronosyltransferase I)                           | 80  | ✓ |  |
| B3GNT2  | NM_006577 | UDP-GlcNAc:betaGal beta-1,3-N-acetylglucosaminyltransferase 2                          | 60  | ✓ |  |
| B4GALT1 | NM_001497 | UDP-Gal:betaGlcNAc beta 1,4- galactosyltransferase, polypeptide 1                      | 80  | ✓ |  |
| B4GALT7 | NM_007255 | xylosylprotein beta 1,4-galactosyltransferase, polypeptide 7 (galactosyltransferase I) | 60  | ✓ |  |
| BAG5    | NM_004873 | BCL2-associated athanogene 5                                                           | 60  | ✓ |  |
| BBOX1   | NM_003986 | butyrobetaine (gamma), 2-oxoglutarate dioxygenase (gamma-butyrobetaine hydroxylase) 1  | 100 | ✓ |  |
| BCAT2   | NM_001190 | branched chain aminotransferase 2                                                      | 80  | ✓ |  |
| BCDO2   | NM_031938 | beta-carotene dioxygenase 2                                                            | 100 | ✓ |  |
| BCMO1   | NM_017429 | beta-carotene 15,15'-monooxygenase 1                                                   | 100 | ✓ |  |
| BDNF    | NM_001709 | brain-derived neurotrophic factor                                                      | 100 | ✓ |  |
| BICD2   | NM_015250 | bicaudal D homolog 2                                                                   | 60  | ✓ |  |

|           |           |                                                           |     |   |       |
|-----------|-----------|-----------------------------------------------------------|-----|---|-------|
| BID       | NM_001196 | BH3 interacting domain death agonist                      | 100 | ✓ |       |
| BIRC6     | NM_016252 | baculoviral IAP repeat-containing 6                       | 60  | ✓ |       |
| BMP6      | NM_001718 | bone morphogenetic protein 6                              | 100 | ✓ |       |
| BMP8A     | NM_181809 | bone morphogenetic protein 8a                             | 100 | ✓ |       |
| BRE       | NM_004899 | brain and reproductive organ-expressed                    | 100 | ✓ |       |
| BRWD1     | NM_018963 | bromodomain and WD repeat domain containing 1             | 100 | ✓ |       |
| BTN1A1    | NM_001732 | butyrophilin, subfamily 1, member A1                      | 100 | ✓ |       |
| BTN3A2    | NM_007047 | butyrophilin, subfamily 3, member A2                      | 100 | ✓ |       |
| BTNL3     | NM_006707 | butyrophilin-like 3                                       | 100 | ✓ |       |
| BZRAP1    | NM_004758 | benzodiazapine receptor (peripheral) associated protein 1 | 100 | ✓ |       |
| C10ORF33  | NM_032709 | chromosome 10 open reading frame 33                       | 100 | ✓ |       |
| C11ORF71  | NM_019021 | chromosome 11 open reading frame 71                       | 100 | ✓ |       |
| C12ORF24  | NM_013300 | chromosome 12 open reading frame 24                       | 100 | ✓ |       |
| C13ORF1   | NM_020456 | chromosome 13 open reading frame 1                        | 100 | ✓ |       |
| C14ORF108 | NM_018229 | chromosome 14 open reading frame 108                      | 100 | ✓ |       |
| C16ORF61  | NM_020188 | chromosome 16 open reading frame 61                       | 100 | ✓ |       |
| C18ORF24  | NM_145060 | chromosome 18 open reading frame 24                       | 60  | ✓ |       |
| C19ORF61  | NM_019108 | chromosome 19 open reading frame 61                       | 80  | ✓ |       |
| C1ORF103  | NM_018372 | chromosome 1 open reading frame 103                       | 100 | ✓ |       |
| C1ORF141  | XM_375738 | chromosome 1 open reading frame 141                       | 100 | ✓ |       |
| C1ORF183  | NM_019099 | chromosome 1 open reading frame 183                       | 100 | ✓ |       |
| C1ORF41   | NM_016126 | chromosome 1 open reading frame 41                        | 80  | ✓ |       |
| C1ORF9    | NM_014283 | chromosome 1 open reading frame 9                         | 100 | ✓ |       |
| C1QB      | NM_000491 | complement component 1, q subcomponent, B chain           | 100 | ✓ |       |
| C6        | NM_000065 | complement component 6                                    | 60  | ✓ |       |
| C6ORF192  | NM_052831 | chromosome 6 open reading frame 192                       | 80  | ✓ |       |
| C7        | NM_000587 | complement component 7                                    | 100 | ✓ |       |
| C7ORF16   | NM_006658 | chromosome 7 open reading frame 16                        | 80  | ✓ |       |
| C8G       | NM_000606 | complement component 8, gamma polypeptide                 | 57  |   | 0.001 |
| C8ORF13   | NM_053279 | chromosome 8 open reading frame 13                        | 80  | ✓ |       |
| C9ORF131  | NM_203299 | chromosome 9 open reading frame 131                       | 100 | ✓ |       |
| CABP2     | NM_016366 | calcium binding protein 2                                 | 80  | ✓ |       |
| CALN1     | NM_031468 | calneuron 1                                               | 60  | ✓ |       |
| CAPNS2    | NM_032330 | calpain, small subunit 2                                  | 60  | ✓ |       |
| CASC3     | NM_007359 | cancer susceptibility candidate 3                         | 100 | ✓ |       |
| CASP8AP2  | NM_012115 | CASP8 associated protein 2                                | 100 | ✓ |       |
| CAT       | NM_001752 | catalase                                                  | 80  | ✓ |       |
| CBLN1     | NM_004352 | cerebellin 1 precursor                                    | 80  | ✓ |       |
| CBX1      | NM_006807 | chromobox homolog 1                                       | 100 | ✓ |       |
| CBX5      | NM_012117 | chromobox homolog 5                                       | 100 | ✓ |       |
| CC2D1A    | NM_017721 | coiled-coil and C2 domain containing 1A                   | 100 | ✓ |       |
| CCAR1     | NM_018237 | cell division cycle and apoptosis regulator 1             | 60  | ✓ |       |
| CCDC28A   | NM_015439 | coiled-coil domain containing 28A                         | 100 | ✓ |       |
| CCDC5     | NM_138443 | coiled-coil domain containing 5                           | 100 | ✓ |       |
| CCDC76    | NM_019083 | coiled-coil domain containing 76                          | 80  | ✓ |       |
| CCDC93    | NM_019044 | coiled-coil domain containing 93                          | 100 | ✓ |       |

|         |              |                                                           |     |   |       |
|---------|--------------|-----------------------------------------------------------|-----|---|-------|
| CCL11   | NM_002986    | chemokine (C-C motif) ligand 11                           | 100 | ✓ |       |
| CCL14   | NM_004166    | chemokine (C-C motif) ligand 14                           | 100 | ✓ |       |
| CCL15   | NM_004167    | chemokine (C-C motif) ligand 15                           | 80  | ✓ |       |
| CCL16   | NM_004590    | chemokine (C-C motif) ligand 16                           | 100 | ✓ |       |
| CCL25   | NM_005624    | chemokine (C-C motif) ligand 25                           | 80  | ✓ |       |
| CCL27   | NM_006664    | chemokine (C-C motif) ligand 27                           | 100 | ✓ |       |
| CCL3    | NM_002983    | chemokine (C-C motif) ligand 3                            | 80  | ✓ |       |
| CCL4L1  | NM_001001435 | chemokine (C-C motif) ligand 4-like 1                     | 100 | ✓ |       |
| CCL7    | NM_006273    | chemokine (C-C motif) ligand 7                            | 100 | ✓ |       |
| CCL8    | NM_005623    | chemokine (C-C motif) ligand 8                            | 100 | ✓ |       |
| CCT6A   | NM_001762    | chaperonin containing TCP1, subunit 6A (zeta 1)           | 100 | ✓ |       |
| CD151   | NM_004357    | CD151 molecule (Raph blood group)                         | 80  | ✓ |       |
| CD160   | NM_007053    | CD160 molecule                                            | 100 | ✓ |       |
| CD163L1 | NM_174941    | CD163 molecule-like 1                                     | 83  | ✓ |       |
| CD164   | NM_006016    | CD164 molecule, sialomucin                                | 100 | ✓ |       |
| CD1B    | NM_001764    | CD1b molecule                                             | 60  | ✓ |       |
| CD2     | NM_001767    | CD2 molecule                                              | 80  | ✓ |       |
| CD200   | NM_001004196 | CD200 molecule                                            | 60  | ✓ |       |
| CD22    | NM_001771    | CD22 molecule                                             | 60  | ✓ |       |
| CD226   | NM_006566    | CD226 molecule                                            | 100 | ✓ |       |
| CD247   | NM_000734    | CD247 molecule                                            | 80  | ✓ |       |
| CD2BP2  | NM_006110    | CD2 (cytoplasmic tail) binding protein 2                  | 80  | ✓ |       |
| CD300C  | NM_006678    | CD300c molecule                                           | 80  | ✓ |       |
| CD33    | NM_001772    | CD33 molecule                                             | 100 | ✓ |       |
| CD3D    | NM_000732    | CD3d molecule, delta (CD3-TCR complex)                    | 100 | ✓ |       |
| CD3G    | NM_000073    | CD3g molecule, gamma (CD3-TCR complex)                    | 60  | ✓ |       |
| CD40LG  | NM_000074    | CD40 ligand                                               | 80  | ✓ |       |
| CD44    | NM_000610    | CD44 molecule (Indian blood group)                        | 100 | ✓ |       |
| CD46    | NM_002389    | CD46 molecule, complement regulatory protein              | 60  | ✓ |       |
| CD5     | NM_014207    | CD5 molecule                                              | 80  | ✓ |       |
| CD52    | NM_001803    | CD52 molecule                                             | 80  | ✓ |       |
| CD59    | NM_000611    | CD59 molecule, complement regulatory protein              | 60  | ✓ |       |
| CD5L    | NM_005894    | CD5 molecule-like                                         | 100 | ✓ |       |
| CD72    | NM_001782    | CD72 molecule                                             | 100 | ✓ |       |
| CD80    | NM_005191    | CD80 molecule                                             | 100 | ✓ |       |
| CD81    | NM_004356    | CD81 molecule                                             | 100 | ✓ |       |
| CD84    | NM_003874    | CD84 molecule                                             | 100 | ✓ |       |
| CD8B    | NM_004931    | CD8b molecule                                             | 100 | ✓ |       |
| CDCA4   | NM_145701    | cell division cycle associated 4                          | 80  | ✓ |       |
| CDCP2   | NM_201546    | CUB domain containing protein 2                           | 100 | ✓ |       |
| CDK10   | NM_003674    | cyclin-dependent kinase 10                                | 33  |   | 0.001 |
| CDK2AP1 | NM_004642    | CDK2-associated protein 1                                 | 100 | ✓ |       |
| CEACAM6 | NM_002483    | carcinoembryonic antigen-related cell adhesion molecule 6 | 100 | ✓ |       |
| CEACAM8 | NM_001816    | carcinoembryonic antigen-related cell adhesion molecule 8 | 100 | ✓ |       |
| CENPA   | NM_001809    | centromere protein A                                      | 100 | ✓ |       |
| CENPF   | NM_016343    | centromere protein F                                      | 100 | ✓ |       |

|          |           |                                                      |     |   |  |
|----------|-----------|------------------------------------------------------|-----|---|--|
| CENPJ    | NM_018451 | centromere protein J                                 | 80  | ✓ |  |
| CEP250   | NM_007186 | centrosomal protein 250kDa                           | 100 | ✓ |  |
| CEP55    | NM_018131 | centrosomal protein 55kDa                            | 80  | ✓ |  |
| CEP78    | XM_095991 | centrosomal protein 78kDa                            | 100 | ✓ |  |
| CEPT1    | NM_006090 | choline/ethanolamine phosphotransferase 1            | 60  | ✓ |  |
| CFD      | NM_001928 | complement factor D (adipsin)                        | 75  | ✓ |  |
| CHAT     | NM_020549 | choline acetyltransferase                            | 60  | ✓ |  |
| CHRD     | NM_003741 | chordin                                              | 100 | ✓ |  |
| CHRFAM7A | NM_139320 | CHRNA7 & FAM7A fusion                                | 60  | ✓ |  |
| CHRNA1   | NM_000079 | cholinergic receptor, nicotinic, alpha 1             | 100 | ✓ |  |
| CHRNA10  | NM_020402 | cholinergic receptor, nicotinic, alpha 10            | 100 | ✓ |  |
| CHRNA2   | NM_000742 | cholinergic receptor, nicotinic, alpha 2             | 60  | ✓ |  |
| CHRNA6   | NM_004198 | cholinergic receptor, nicotinic, alpha 6             | 80  | ✓ |  |
| CHRNA7   | NM_000746 | cholinergic receptor, nicotinic, alpha 7             | 100 | ✓ |  |
| CHRNA9   | NM_017581 | cholinergic receptor, nicotinic, alpha 9             | 100 | ✓ |  |
| CHRNB1   | NM_000747 | cholinergic receptor, nicotinic, beta 1              | 100 | ✓ |  |
| CHRNB4   | NM_000750 | cholinergic receptor, nicotinic, beta 4              | 100 | ✓ |  |
| CHRND    | NM_000751 | cholinergic receptor, nicotinic, delta               | 60  | ✓ |  |
| CIRH1A   | NM_032830 | cirrhosis, autosomal recessive 1A                    | 60  | ✓ |  |
| CKAP5    | NM_014756 | cytoskeleton associated protein 5                    | 60  | ✓ |  |
| CKLF     | NM_181641 | chemokine-like factor                                | 100 | ✓ |  |
| CLEC11A  | NM_002975 | C-type lectin domain family 11, member A             | 80  | ✓ |  |
| CLEC12A  | NM_138337 | C-type lectin domain family 12, member A             | 80  | ✓ |  |
| CLEC1A   | NM_016511 | C-type lectin domain family 1, member A              | 100 | ✓ |  |
| CLEC1B   | NM_016509 | C-type lectin domain family 1, member B              | 100 | ✓ |  |
| CLEC2D   | NM_013269 | C-type lectin domain family 2, member D              | 100 | ✓ |  |
| CLEC3B   | NM_003278 | C-type lectin domain family 3, member B              | 75  | ✓ |  |
| CLEC4G   | NM_198492 | C-type lectin superfamily 4, member G                | 100 | ✓ |  |
| CNOT6    | NM_015455 | CCR4-NOT transcription complex, subunit 6            | 60  | ✓ |  |
| CNTF     | NM_000614 | ciliary neurotrophic factor                          | 100 | ✓ |  |
| CNTNAP1  | NM_003632 | contactin associated protein 1                       | 100 | ✓ |  |
| COG2     | NM_007357 | component of oligomeric golgi complex 2              | 100 | ✓ |  |
| COL1A1   | NM_000088 | collagen, type I, alpha 1                            | 80  | ✓ |  |
| COLEC10  | NM_006438 | collectin sub-family member 10 (C-type lectin)       | 100 | ✓ |  |
| COPA     | NM_004371 | coatamer protein complex, subunit alpha              | 100 | ✓ |  |
| COPB2    | NM_004766 | coatamer protein complex, subunit beta 2             | 100 | ✓ |  |
| COPE     | NM_007263 | coatamer protein complex, subunit epsilon            | 80  | ✓ |  |
| COPS6    | NM_006833 | COP9 constitutive photomorphogenic homolog subunit 6 | 100 | ✓ |  |
| COPZ1    | NM_016057 | coatamer protein complex, subunit zeta 1             | 80  | ✓ |  |
| COPZ2    | NM_016429 | coatamer protein complex, subunit zeta 2             | 100 | ✓ |  |
| COQ2     | NM_015697 | coenzyme Q2 homolog, prenyltransferase               | 100 | ✓ |  |
| COQ6     | NM_182476 | coenzyme Q6 homolog, monoxygenase                    | 100 | ✓ |  |
| CPT1B    | NM_004377 | carnitine palmitoyltransferase 1B                    | 100 | ✓ |  |
| CRAT     | NM_000755 | carnitine acetyltransferase                          | 100 | ✓ |  |
| CRLF3    | NM_015986 | cytokine receptor-like factor 3                      | 100 | ✓ |  |
| CRYL1    | NM_015974 | crystallin, lambda 1                                 | 80  | ✓ |  |

|          |           |                                                                                |     |   |       |
|----------|-----------|--------------------------------------------------------------------------------|-----|---|-------|
| CSDC2    | NM_014460 | cold shock domain containing C2, RNA binding                                   | 80  | ✓ |       |
| CSF1     | NM_000757 | colony stimulating factor 1                                                    | 100 | ✓ |       |
| CSF3R    | NM_000760 | colony stimulating factor 3 receptor                                           | 100 | ✓ |       |
| CSNK1E   | NM_152221 | casein kinase 1, epsilon                                                       | 32  |   | 0.000 |
| CTF1     | NM_001330 | cardiotrophin 1                                                                | 100 | ✓ |       |
| CTHRC1   | NM_138455 | collagen triple helix repeat containing 1                                      | 80  | ✓ |       |
| CTNNA1   | NM_001903 | catenin (cadherin-associated protein), alpha 1                                 | 100 | ✓ |       |
| CTNS     | NM_004937 | cystinosis, nephropathic                                                       | 100 | ✓ |       |
| CTR9     | NM_014633 | Ctr9, Paf1/RNA polymerase II complex component, homolog                        | 60  | ✓ |       |
| CTSA     | NM_000308 | cathepsin A                                                                    | 60  | ✓ |       |
| CTSZ     | NM_001336 | cathepsin Z                                                                    | 75  | ✓ |       |
| CXADR    | NM_001338 | coxsackie virus and adenovirus receptor                                        | 100 | ✓ |       |
| CXCL1    | NM_001511 | chemokine (C-X-C motif) ligand 1 (melanoma growth stimulating activity, alpha) | 80  | ✓ |       |
| CXCL11   | NM_005409 | chemokine (C-X-C motif) ligand 11                                              | 100 | ✓ |       |
| CXCL14   | NM_004887 | chemokine (C-X-C motif) ligand 14                                              | 80  | ✓ |       |
| CYB561   | NM_001915 | cytochrome b-561                                                               | 100 | ✓ |       |
| CYB561D1 | NM_182580 | cytochrome b-561 domain containing 1                                           | 100 | ✓ |       |
| CYB5A    | NM_001914 | cytochrome b5 type A (microsomal)                                              | 100 | ✓ |       |
| CYB5B    | NM_030579 | cytochrome b5 type B                                                           | 100 | ✓ |       |
| CYBA     | NM_000101 | cytochrome b-245, alpha polypeptide                                            | 60  | ✓ |       |
| CYBASC3  | NM_153611 | cytochrome b, ascorbate dependent 3                                            | 100 | ✓ |       |
| CYBB     | NM_000397 | cytochrome b-245, beta polypeptide                                             | 60  | ✓ |       |
| CYCS     | NM_018947 | cytochrome c, somatic                                                          | 100 | ✓ |       |
| CYLC2    | NM_001340 | cylicin, basic protein of sperm head cytoskeleton 2                            | 100 | ✓ |       |
| CYP11A1  | NM_000781 | cytochrome P450, family 11, subfamily A, polypeptide 1                         | 80  | ✓ |       |
| CYP11B1  | NM_000497 | cytochrome P450, family 11, subfamily B, polypeptide 1                         | 80  | ✓ |       |
| CYP11B2  | NM_000498 | cytochrome P450, family 11, subfamily B, polypeptide 2                         | 100 | ✓ |       |
| CYP17A1  | NM_000102 | cytochrome P450, family 17, subfamily A, polypeptide 1                         | 100 | ✓ |       |
| CYP19A1  | NM_000103 | cytochrome P450, family 19, subfamily A, polypeptide 1                         | 100 | ✓ |       |
| CYP1A1   | NM_000499 | cytochrome P450, family 1, subfamily A, polypeptide 1                          | 100 | ✓ |       |
| CYP1A2   | NM_000761 | cytochrome P450, family 1, subfamily A, polypeptide 2                          | 100 | ✓ |       |
| CYP1B1   | NM_000104 | cytochrome P450, family 1, subfamily B, polypeptide 1                          | 100 | ✓ |       |
| CYP20A1  | NM_020674 | cytochrome P450, family 20, subfamily A, polypeptide 1                         | 100 | ✓ |       |
| CYP21A2  | NM_000500 | cytochrome P450, family 21, subfamily A, polypeptide 2                         | 100 | ✓ |       |
| CYP24A1  | NM_000782 | cytochrome P450, family 24, subfamily A, polypeptide 1                         | 100 | ✓ |       |
| CYP26A1  | NM_000783 | cytochrome P450, family 26, subfamily A, polypeptide 1                         | 100 | ✓ |       |
| CYP26B1  | NM_019885 | cytochrome P450, family 26, subfamily B, polypeptide 1                         | 80  | ✓ |       |
| CYP26C1  | NM_183374 | cytochrome P450, family 26, subfamily C, polypeptide 1                         | 80  | ✓ |       |
| CYP27A1  | NM_000784 | cytochrome P450, family 27, subfamily A, polypeptide 1                         | 100 | ✓ |       |
| CYP27B1  | NM_000785 | cytochrome P450, family 27, subfamily B, polypeptide 1                         | 80  | ✓ |       |
| CYP2A13  | NM_000766 | cytochrome P450, family 2, subfamily A, polypeptide 13                         | 100 | ✓ |       |
| CYP2A6   | NM_000762 | cytochrome P450, family 2, subfamily A, polypeptide 6                          | 100 | ✓ |       |
| CYP2A7   | NM_000764 | cytochrome P450, family 2, subfamily A, polypeptide 7                          | 100 | ✓ |       |
| CYP2B6   | NM_000767 | cytochrome P450, family 2, subfamily B, polypeptide 6                          | 60  | ✓ |       |
| CYP2C18  | NM_000772 | cytochrome P450, family 2, subfamily C, polypeptide 18                         | 100 | ✓ |       |
| CYP2C19  | NM_000769 | cytochrome P450, family 2, subfamily C, polypeptide 19                         | 100 | ✓ |       |

|          |              |                                                                                       |     |   |  |
|----------|--------------|---------------------------------------------------------------------------------------|-----|---|--|
| CYP2C8   | NM_000770    | cytochrome P450, family 2, subfamily C, polypeptide 8                                 | 100 | ✓ |  |
| CYP2C9   | NM_000771    | cytochrome P450, family 2, subfamily C, polypeptide 9                                 | 80  | ✓ |  |
| CYP2D6   | NM_000106    | cytochrome P450, family 2, subfamily D, polypeptide 6                                 | 100 | ✓ |  |
| CYP2D7P1 | NM_001002910 | cytochrome P450, family 2, subfamily D, polypeptide 7 pseudogene 1                    | 80  | ✓ |  |
| CYP2E1   | NM_000773    | cytochrome P450, family 2, subfamily E, polypeptide 1                                 | 60  | ✓ |  |
| CYP2F1   | NM_000774    | cytochrome P450, family 2, subfamily F, polypeptide 1                                 | 80  | ✓ |  |
| CYP2J2   | NM_000775    | cytochrome P450, family 2, subfamily J, polypeptide 2                                 | 100 | ✓ |  |
| CYP2R1   | NM_024514    | cytochrome P450, family 2, subfamily R, polypeptide 1                                 | 80  | ✓ |  |
| CYP2U1   | NM_183075    | cytochrome P450, family 2, subfamily U, polypeptide 1                                 | 75  | ✓ |  |
| CYP2W1   | NM_017781    | cytochrome P450, family 2, subfamily W, polypeptide 1                                 | 100 | ✓ |  |
| CYP39A1  | NM_016593    | cytochrome P450, family 39, subfamily A, polypeptide 1                                | 100 | ✓ |  |
| CYP3A4   | NM_017460    | cytochrome P450, family 3, subfamily A, polypeptide 4                                 | 100 | ✓ |  |
| CYP3A43  | NM_022820    | cytochrome P450, family 3, subfamily A, polypeptide 43                                | 100 | ✓ |  |
| CYP3A5   | NM_000777    | cytochrome P450, family 3, subfamily A, polypeptide 5                                 | 100 | ✓ |  |
| CYP3A7   | NM_000765    | cytochrome P450, family 3, subfamily A, polypeptide 7                                 | 100 | ✓ |  |
| CYP4B1   | NM_000779    | cytochrome P450, family 4, subfamily B, polypeptide 1                                 | 100 | ✓ |  |
| CYP4F11  | NM_021187    | cytochrome P450, family 4, subfamily F, polypeptide 11                                | 80  | ✓ |  |
| CYP4F12  | NM_023944    | cytochrome P450, family 4, subfamily F, polypeptide 12                                | 80  | ✓ |  |
| CYP4F2   | NM_001082    | cytochrome P450, family 4, subfamily F, polypeptide 2                                 | 100 | ✓ |  |
| CYP4F22  | NM_173483    | cytochrome P450, family 4, subfamily F, polypeptide 22                                | 100 | ✓ |  |
| CYP4F3   | NM_000896    | cytochrome P450, family 4, subfamily F, polypeptide 3                                 | 100 | ✓ |  |
| CYP4X1   | NM_178033    | cytochrome P450, family 4, subfamily X, polypeptide 1                                 | 100 | ✓ |  |
| CYP4Z1   | NM_178134    | cytochrome P450, family 4, subfamily Z, polypeptide 1                                 | 100 | ✓ |  |
| CYP51A1  | NM_000786    | cytochrome P450, family 51, subfamily A, polypeptide 1                                | 80  | ✓ |  |
| CYP7A1   | NM_000780    | cytochrome P450, family 7, subfamily A, polypeptide 1                                 | 100 | ✓ |  |
| CYP7B1   | NM_004820    | cytochrome P450, family 7, subfamily B, polypeptide 1                                 | 80  | ✓ |  |
| CYP8B1   | NM_004391    | cytochrome P450, family 8, subfamily B, polypeptide 1                                 | 100 | ✓ |  |
| CYTH1    | NM_004762    | cytohesin 1                                                                           | 100 | ✓ |  |
| CYTH2    | NM_017457    | cytohesin 2                                                                           | 100 | ✓ |  |
| D2HGDH   | NM_152783    | D-2-hydroxyglutarate dehydrogenase                                                    | 80  | ✓ |  |
| DAB1     | NM_021080    | disabled homolog 1 (Drosophila) (DAB1)                                                | 80  | ✓ |  |
| DBI      | NM_020548    | diazepam binding inhibitor (GABA receptor modulator, acyl-Coenzyme A binding protein) | 80  | ✓ |  |
| DBN1     | NM_004395    | drebrin 1                                                                             | 100 | ✓ |  |
| DCBLD2   | NM_080927    | discoidin, CUB and LCCL domain containing 2                                           | 100 | ✓ |  |
| DCLRE1B  | NM_022836    | DNA cross-link repair 1B                                                              | 100 | ✓ |  |
| DCTN1    | NM_004082    | dynactin 1                                                                            | 100 | ✓ |  |
| DDIT4    | NM_019058    | DNA-damage-inducible transcript 4                                                     | 80  | ✓ |  |
| DDOST    | NM_005216    | dolichyl-diphosphooligosaccharide-protein glycosyltransferase                         | 60  | ✓ |  |
| DEGS1    | NM_003676    | degenerative spermatocyte homolog 1, lipid desaturase                                 | 100 | ✓ |  |
| DEPDC1B  | NM_018369    | DEP domain containing 1B                                                              | 80  | ✓ |  |
| DERL1    | NM_024295    | Der1-like domain family, member 1                                                     | 80  | ✓ |  |
| DGAT2L3  | XM_088691    | diacylglycerol O-acyltransferase 2-like 3                                             | 60  | ✓ |  |
| DGKE     | NM_003647    | diacylglycerol kinase, epsilon 64kDa                                                  | 60  | ✓ |  |
| DHRS13   | NM_144683    | dehydrogenase/reductase (SDR family) member 13                                        | 100 | ✓ |  |
| DHX34    | NM_014681    | DEAH (Asp-Glu-Ala-His) box polypeptide 34                                             | 60  | ✓ |  |
| DIABLO   | NM_019887    | diablo homolog                                                                        | 60  | ✓ |  |

|               |              |                                                                            |     |   |  |
|---------------|--------------|----------------------------------------------------------------------------|-----|---|--|
| DKFZP434A0131 | NM_018991    | DKFZp434A0131 protein                                                      | 100 | ✓ |  |
| DLEU1         | NM_005887    | deleted in lymphocytic leukemia 1                                          | 100 | ✓ |  |
| DLEU2         | NM_006021    | deleted in lymphocytic leukemia 2                                          | 100 | ✓ |  |
| DLGAP5        | NM_014750    | discs, large (Drosophila) homolog-associated protein 5                     | 100 | ✓ |  |
| DNAJC16       | XM_497656    | DnaJ (Hsp40) homolog, subfamily C, member 16                               | 60  | ✓ |  |
| DOCK5         | NM_024940    | dedicator of cytokinesis 5                                                 | 60  | ✓ |  |
| DPM2          | NM_003863    | dolichyl-phosphate mannosyltransferase polypeptide 2, regulatory subunit   | 67  | ✓ |  |
| DSCAM         | NM_001389    | Down syndrome cell adhesion molecule                                       | 80  | ✓ |  |
| DUS2L         | NM_017803    | dihydrouridine synthase 2-like, SMM1 homolog                               | 100 | ✓ |  |
| DUSP12        | NM_007240    | dual specificity phosphatase 12                                            | 60  | ✓ |  |
| DUSP21        | NM_022076    | dual specificity phosphatase 21                                            | 60  | ✓ |  |
| DYNLL1        | NM_003746    | dynein, light chain, LC8-type 1                                            | 100 | ✓ |  |
| DYNLT1        | NM_006519    | dynein, light chain, Tctex-type 1                                          | 60  | ✓ |  |
| E2F5          | NM_001951    | E2F transcription factor 5, p130-binding                                   | 80  | ✓ |  |
| EARS2         | NM_133451    | glutamyl-tRNA synthetase 2                                                 | 60  | ✓ |  |
| EBAG9         | NM_004215    | estrogen receptor binding site associated, antigen, 9                      | 80  | ✓ |  |
| EBI3          | NM_005755    | Epstein-Barr virus induced gene 3                                          | 75  | ✓ |  |
| EBNA1BP2      | NM_006824    | EBNA1 binding protein 2                                                    | 100 | ✓ |  |
| EDA           | NM_001005609 | ectodysplasin A                                                            | 100 | ✓ |  |
| EEF1E1        | NM_004280    | eukaryotic translation elongation factor 1 epsilon 1                       | 100 | ✓ |  |
| EFHD1         | NM_025202    | EF-hand domain family, member D1                                           | 60  | ✓ |  |
| EFNA2         | NM_001405    | ephrin-A2                                                                  | 80  | ✓ |  |
| EFNA3         | NM_004952    | ephrin-A3                                                                  | 100 | ✓ |  |
| EFNA4         | NM_005227    | ephrin-A4                                                                  | 100 | ✓ |  |
| EFNA5         | NM_001962    | ephrin-A5                                                                  | 100 | ✓ |  |
| EFNB2         | NM_004093    | ephrin-B2                                                                  | 60  | ✓ |  |
| EHHADH        | NM_001966    | enoyl-Coenzyme A, hydratase/3-hydroxyacyl Coenzyme A dehydrogenase         | 100 | ✓ |  |
| EIF1          | NM_005801    | eukaryotic translation initiation factor 1                                 | 80  | ✓ |  |
| EIF1AX        | NM_001412    | eukaryotic translation initiation factor 1A, X-linked                      | 100 | ✓ |  |
| EIF3G         | NM_003755    | eukaryotic translation initiation factor 3, subunit G                      | 80  | ✓ |  |
| EIF4A3        | NM_014740    | eukaryotic translation initiation factor 4A, isoform 3                     | 80  | ✓ |  |
| EIF4B         | NM_001417    | eukaryotic translation initiation factor 4B                                | 60  | ✓ |  |
| EIF4E         | NM_001968    | eukaryotic translation initiation factor 4E                                | 100 | ✓ |  |
| EIF4EBP1      | NM_004095    | eukaryotic translation initiation factor 4E binding protein 1              | 80  | ✓ |  |
| EIF4EBP3      | NM_003732    | eukaryotic translation initiation factor 4E binding protein 3              | 80  | ✓ |  |
| EIF5A         | NM_001970    | eukaryotic translation initiation factor 5A                                | 100 | ✓ |  |
| EIF5B         | NM_015904    | eukaryotic translation initiation factor 5B                                | 80  | ✓ |  |
| EMP2          | NM_001424    | epithelial membrane protein 2                                              | 100 | ✓ |  |
| EMR4          | XM_377506    | PREDICTED: egf-like module containing, mucin-like, hormone receptor-like 4 | 60  | ✓ |  |
| ENC1          | NM_003633    | ectodermal-neural cortex (with BTB-like domain)                            | 80  | ✓ |  |
| EPB41L4B      | NM_019114    | erythrocyte membrane protein band 4.1 like 4B                              | 100 | ✓ |  |
| EPOR          | NM_000121    | erythropoietin receptor                                                    | 80  | ✓ |  |
| EPS8L3        | NM_024526    | EPS8-like 3                                                                | 100 | ✓ |  |
| ERAP1         | NM_016442    | endoplasmic reticulum aminopeptidase 1                                     | 100 | ✓ |  |
| ERBB2IP       | NM_018695    | erbb2 interacting protein                                                  | 100 | ✓ |  |
| ERGIC1        | NM_020462    | endoplasmic reticulum-golgi intermediate compartment                       | 100 | ✓ |  |



|        |           |                                                                      |     |   |  |
|--------|-----------|----------------------------------------------------------------------|-----|---|--|
| ERLIN1 | NM_006459 | ER lipid raft associated 1                                           | 60  | ✓ |  |
| ERVWE1 | NM_014590 | endogenous retroviral family W, env(C7), member 1                    | 100 | ✓ |  |
| ETAA1  | NM_019002 | Ewing tumor-associated antigen 1                                     | 60  | ✓ |  |
| ETFA   | NM_000126 | electron-transfer-flavoprotein, alpha polypeptide                    | 100 | ✓ |  |
| ETFB   | NM_001985 | electron-transfer-flavoprotein, beta polypeptide                     | 100 | ✓ |  |
| EXOC5  | NM_006544 | exocyst complex component 5                                          | 100 | ✓ |  |
| EXOC6  | NM_019053 | exocyst complex component 6                                          | 100 | ✓ |  |
| EXOSC2 | NM_014285 | exosome component 2                                                  | 60  | ✓ |  |
| EXOSC4 | NM_019037 | exosome component 4                                                  | 60  | ✓ |  |
| EYA4   | NM_004100 | eyes absent homolog 4                                                | 60  | ✓ |  |
| F11R   | NM_016946 | F11 receptor                                                         | 100 | ✓ |  |
| F3     | NM_001993 | coagulation factor III                                               | 100 | ✓ |  |
| FABP3  | NM_004102 | fatty acid binding protein 3, muscle and hear                        | 100 | ✓ |  |
| FABP5  | NM_001444 | fatty acid binding protein 5 (psoriasis-associated)                  | 80  | ✓ |  |
| FABP6  | NM_001445 | fatty acid binding protein 6, ileal (gastrotropin)                   | 100 | ✓ |  |
| FADS1  | NM_013402 | fatty acid desaturase 1                                              | 100 | ✓ |  |
| FADS2  | NM_004265 | fatty acid desaturase 2                                              | 100 | ✓ |  |
| FADS3  | NM_021727 | fatty acid desaturase 3                                              | 100 | ✓ |  |
| FADS6  | NM_178128 | fatty acid desaturase domain family, member 6                        | 100 | ✓ |  |
| FAHD1  | NM_031208 | fumarylacetoacetate hydrolase domain containing 1                    | 80  | ✓ |  |
| FAM33A | NM_182620 | family with sequence similarity 33, member A                         | 60  | ✓ |  |
| FAM64A | NM_019013 | family with sequence similarity 64, member A                         | 100 | ✓ |  |
| FAM89B | NM_152832 | family with sequence similarity 89, member B                         | 100 | ✓ |  |
| FAT    | NM_005245 | FAT tumor suppressor homolog 1                                       | 100 | ✓ |  |
| FBXL19 | NM_019085 | F-box and leucine-rich repeat protein 19                             | 60  | ✓ |  |
| FCAMR  | NM_032029 | Fc receptor, IgA, IgM, high affinity                                 | 100 | ✓ |  |
| FCER1G | NM_004106 | Fc fragment of IgE, high affinity I, receptor for; gamma polypeptide | 80  | ✓ |  |
| FCGBP  | NM_003890 | Fc fragment of IgG binding protein                                   | 100 | ✓ |  |
| FCRL3  | NM_052939 | Fc receptor-like 3                                                   | 100 | ✓ |  |
| FCRL4  | NM_031282 | Fc receptor-like 4                                                   | 60  | ✓ |  |
| FCRL5  | NM_031281 | Fc receptor-like 5                                                   | 60  | ✓ |  |
| FCRLA  | NM_032738 | Fc receptor-like A                                                   | 80  | ✓ |  |
| FDPS   | NM_002004 | farnesyl diphosphate synthase                                        | 60  | ✓ |  |
| FEM1A  | NM_018708 | fem-1 homolog a                                                      | 100 | ✓ |  |
| FEM1B  | NM_015322 | fem-1 homolog b                                                      | 100 | ✓ |  |
| FEZ1   | NM_005103 | fasciculation and elongation protein zeta 1                          | 100 | ✓ |  |
| FEZ2   | NM_005102 | fasciculation and elongation protein zeta 2                          | 80  | ✓ |  |
| FGF1   | NM_033137 | fibroblast growth factor 1                                           | 100 | ✓ |  |
| FGF10  | NM_004465 | fibroblast growth factor 10                                          | 100 | ✓ |  |
| FGF13  | NM_004114 | fibroblast growth factor 13                                          | 100 | ✓ |  |
| FGF21  | NM_019113 | fibroblast growth factor 21                                          | 60  | ✓ |  |
| FGF22  | NM_020637 | fibroblast growth factor 22                                          | 80  | ✓ |  |
| FGF23  | NM_020638 | fibroblast growth factor 23                                          | 100 | ✓ |  |
| FGF5   | NM_004464 | fibroblast growth factor 5                                           | 100 | ✓ |  |
| FGF8   | NM_006119 | fibroblast growth factor 8                                           | 100 | ✓ |  |
| FKBP3  | NM_002013 | FK506 binding protein 3, 25kDa                                       | 60  | ✓ |  |

|           |              |                                                                       |     |   |       |
|-----------|--------------|-----------------------------------------------------------------------|-----|---|-------|
| FLJ10404  | NM_019057    | hypothetical protein FLJ10404                                         | 100 | ✓ |       |
| FLJ20152  | NM_019000    | hypothetical protein FLJ20152                                         | 100 | ✓ |       |
| FLJ20323  | NM_019005    | hypothetical protein FLJ20323                                         | 80  | ✓ |       |
| FLJ20674  | NM_019086    | hypothetical protein FLJ20674                                         | 100 | ✓ |       |
| FLJ38482  | NM_152681    | hypothetical protein FLJ38482                                         | 60  | ✓ |       |
| FLNA      | NM_001456    | filamin A, alpha (actin binding protein 280)                          | 100 | ✓ |       |
| FLNB      | NM_001457    | filamin B, beta (actin binding protein 278)                           | 100 | ✓ |       |
| FLNC      | NM_001458    | filamin C, gamma (actin binding protein 280)                          | 100 | ✓ |       |
| FLRT2     | NM_013231    | fibronectin leucine rich transmembrane protein 2                      | 100 | ✓ |       |
| FLVCR1    | NM_014053    | feline leukemia virus subgroup C cellular receptor 1                  | 80  | ✓ |       |
| FMO1      | NM_002021    | flavin containing monooxygenase 1                                     | 80  | ✓ |       |
| FMO2      | NM_001460    | flavin containing monooxygenase 2                                     | 50  |   | 0.000 |
| FMO3      | NM_001002294 | flavin containing monooxygenase 3                                     | 100 | ✓ |       |
| FMO4      | NM_002022    | flavin containing monooxygenase 4                                     | 100 | ✓ |       |
| FMO5      | NM_001461    | flavin containing monooxygenase 5                                     | 100 | ✓ |       |
| FOLR2     | NM_000803    | folate receptor 2 (fetal)                                             | 100 | ✓ |       |
| FOXF1     | NM_001451    | forkhead box F1                                                       | 60  | ✓ |       |
| FOXRED2   | NM_024955    | FAD-dependent oxidoreductase domain containing 2                      | 100 | ✓ |       |
| FRAT1     | NM_005479    | frequently rearranged in advanced T-cell lymphomas                    | 80  | ✓ |       |
| FRS3      | NM_006653    | fibroblast growth factor receptor substrate 3                         | 100 | ✓ |       |
| FST       | NM_006350    | follistatin                                                           | 60  | ✓ |       |
| FUT11     | NM_173540    | fucosyltransferase 11 (alpha (1,3) fucosyltransferase)                | 60  | ✓ |       |
| FUT8      | NM_004480    | fucosyltransferase 8 (alpha (1,6) fucosyltransferase)                 | 60  | ✓ |       |
| GABARAPL1 | NM_031412    | GABA(A) receptor-associated protein like 1                            | 100 | ✓ |       |
| GABPB1    | NM_002041    | GA binding protein transcription factor, beta subunit 2               | 60  | ✓ |       |
| GABRB1    | NM_000812    | gamma-aminobutyric acid (GABA) A receptor, beta 1                     | 80  | ✓ |       |
| GABRG3    | NM_033223    | gamma-aminobutyric acid (GABA) A receptor, gamma 3                    | 80  | ✓ |       |
| GABRP     | NM_014211    | gamma-aminobutyric acid (GABA) A receptor, pi                         | 100 | ✓ |       |
| GABRQ     | NM_018558    | gamma-aminobutyric acid (GABA) receptor, theta                        | 80  | ✓ |       |
| GABRR1    | NM_002042    | gamma-aminobutyric acid (GABA) receptor, rho 1                        | 60  | ✓ |       |
| GABRR2    | NM_002043    | gamma-aminobutyric acid (GABA) receptor, rho 2                        | 60  | ✓ |       |
| GDF15     | NM_004864    | growth differentiation factor 15                                      | 100 | ✓ |       |
| GDF2      | NM_016204    | growth differentiation factor 2                                       | 60  | ✓ |       |
| GDF3      | NM_020634    | growth differentiation factor 3                                       | 100 | ✓ |       |
| GDF5      | NM_000557    | growth differentiation factor 5                                       | 100 | ✓ |       |
| GDF9      | NM_005260    | growth differentiation factor 9                                       | 100 | ✓ |       |
| GFOD2     | NM_030819    | glucose-fructose oxidoreductase domain containing 2                   | 80  | ✓ |       |
| GFRA2     | NM_001495    | GDNF family receptor alpha 2                                          | 100 | ✓ |       |
| GFRA4     | NM_022139    | GDNF family receptor alpha 4                                          | 100 | ✓ |       |
| GGA2      | NM_015044    | golgi associated, gamma adaptin ear containing, ARF binding protein 2 | 100 | ✓ |       |
| GGA3      | NM_014001    | golgi associated, gamma adaptin ear containing, ARF binding protein 3 | 100 | ✓ |       |
| GH1       | NM_000515    | growth hormone 1                                                      | 100 | ✓ |       |
| GJA3      | NM_021954    | gap junction protein, alpha 3                                         | 80  | ✓ |       |
| GJA4      | NM_002060    | gap junction protein, alpha 4                                         | 60  | ✓ |       |
| GJB1      | NM_000166    | gap junction protein, beta 1                                          | 100 | ✓ |       |
| GJB2      | NM_004004    | gap junction protein, beta 2                                          | 60  | ✓ |       |

|         |              |                                                                             |     |   |       |
|---------|--------------|-----------------------------------------------------------------------------|-----|---|-------|
| GLRA3   | NM_006529    | glycine receptor, alpha 3                                                   | 100 | ✓ |       |
| GLRX    | NM_002064    | glutaredoxin (thioltransferase)                                             | 80  | ✓ |       |
| GLRX2   | NM_016066    | glutaredoxin 2                                                              | 100 | ✓ |       |
| GLRX3   | NM_006541    | glutaredoxin 3                                                              | 100 | ✓ |       |
| GNG8    | NM_033258    | guanine nucleotide binding protein (G protein), gamma 8                     | 60  | ✓ |       |
| GNRHR2  | NM_057163    | gonadotropin-releasing hormone (type 2) receptor 2                          | 60  | ✓ |       |
| GOLGA4  | NM_002078    | golgi autoantigen, golgin subfamily a, 4                                    | 60  | ✓ |       |
| GP6     | NM_016363    | glycoprotein VI                                                             | 100 | ✓ |       |
| GPA33   | NM_005814    | glycoprotein A33                                                            | 100 | ✓ |       |
| GPBAR1  | NM_170699    | G protein-coupled bile acid receptor 1                                      | 60  | ✓ |       |
| GPR107  | NM_020960    | G protein-coupled receptor 107                                              | 100 | ✓ |       |
| GPR119  | NM_178471    | G protein-coupled receptor 119                                              | 80  | ✓ |       |
| GPR152  | NM_206997    | G protein-coupled receptor 152                                              | 100 | ✓ |       |
| GPR153  | NM_207370    | G protein-coupled receptor 153                                              | 80  | ✓ |       |
| GPR158  | NM_020752    | G protein-coupled receptor 158                                              | 100 | ✓ |       |
| GPR180  | NM_180989    | G protein-coupled receptor 180                                              | 60  | ✓ |       |
| GRASP   | NM_181711    | GRP1 (general receptor for phosphoinositides 1)-associated scaffold protein | 100 | ✓ |       |
| GRB10   | NM_001001549 | growth factor receptor-bound protein 10                                     | 100 | ✓ |       |
| GRB14   | NM_004490    | growth factor receptor-bound protein 14                                     | 100 | ✓ |       |
| GRB7    | NM_005310    | growth factor receptor-bound protein 7                                      | 80  | ✓ |       |
| GRID1   | XM_043613    | glutamate receptor, ionotropic, delta 1                                     | 100 | ✓ |       |
| GRID2   | NM_001510    | glutamate receptor, ionotropic, delta 2                                     | 100 | ✓ |       |
| GRIK1   | NM_000830    | glutamate receptor, ionotropic, kainate 1                                   | 100 | ✓ |       |
| GRIK2   | NM_021956    | glutamate receptor, ionotropic, kainate 2                                   | 100 | ✓ |       |
| GRIK3   | NM_000831    | glutamate receptor, ionotropic, kainate 3                                   | 100 | ✓ |       |
| GRIK4   | NM_014619    | glutamate receptor, ionotropic, kainate 4                                   | 100 | ✓ |       |
| GRIK5   | NM_002088    | glutamate receptor, ionotropic, kainate 5                                   | 100 | ✓ |       |
| GRIN1   | NM_000832    | glutamate receptor, ionotropic, N-methyl D-aspartate 1                      | 100 | ✓ |       |
| GRIN2A  | NM_000833    | glutamate receptor, ionotropic, N-methyl D-aspartate 2A                     | 100 | ✓ |       |
| GRIN2B  | NM_000834    | glutamate receptor, ionotropic, N-methyl D-aspartate 2B                     | 100 | ✓ |       |
| GRIN2C  | NM_000835    | glutamate receptor, ionotropic, N-methyl D-aspartate 2C                     | 100 | ✓ |       |
| GRIN2D  | NM_000836    | glutamate receptor, ionotropic, N-methyl D-aspartate 2D                     | 100 | ✓ |       |
| GRIN3A  | NM_133445    | glutamate receptor, ionotropic, N-methyl-D-aspartate 3A                     | 100 | ✓ |       |
| GRINA   | XM_291268    | glutamate receptor, ionotropic, N-methyl D-aspartate-associated protein 1   | 100 | ✓ |       |
| GUCA1A  | NM_000409    | guanylate cyclase activator 1A                                              | 100 | ✓ |       |
| GUCY1A3 | NM_000856    | guanylate cyclase 1, soluble, alpha 3                                       | 100 | ✓ |       |
| GUCY1B3 | NM_000857    | guanylate cyclase 1, soluble, beta 3                                        | 100 | ✓ |       |
| H2AFZ   | NM_002106    | H2A histone family, member Z                                                | 100 | ✓ |       |
| H3F3B   | NM_005324    | H3 histone, family 3B                                                       | 100 | ✓ |       |
| HAO     | NM_012205    | 3-hydroxyanthranilate 3,4-dioxygenase                                       | 80  | ✓ |       |
| HBE1    | NM_005330    | hemoglobin, epsilon 1                                                       | 100 | ✓ |       |
| HBEGF   | NM_001945    | heparin-binding EGF-like growth factor                                      | 100 | ✓ |       |
| HBG2    | NM_000184    | hemoglobin, gamma G                                                         | 80  | ✓ |       |
| HBQ1    | NM_005331    | hemoglobin, theta 1                                                         | 100 | ✓ |       |
| HDAC1   | NM_004964    | histone deacetylase 1                                                       | 40  |   | 0.000 |
| HEMK1   | NM_016173    | HemK methyltransferase family member 1                                      | 60  | ✓ |       |

|          |           |                                                             |     |   |       |
|----------|-----------|-------------------------------------------------------------|-----|---|-------|
| HEPH     | NM_014799 | hephaestin                                                  | 100 | ✓ |       |
| HERPUD2  | NM_022373 | HERPUD family member 2                                      | 60  | ✓ |       |
| HERV-FRD | NM_207582 | HERV-FRD provirus ancestral Env polyprotein                 | 80  | ✓ |       |
| HEY2     | NM_012259 | hairy/enhancer-of-split related with YRPW motif 2           | 60  | ✓ |       |
| HFE      | NM_000410 | hemochromatosis                                             | 100 | ✓ |       |
| HGFAC    | NM_001528 | HGF activator                                               | 80  | ✓ |       |
| HINT2    | NM_032593 | histidine triad nucleotide binding protein 2                | 60  | ✓ |       |
| HLA-B    | NM_005514 | major histocompatibility complex, class I, B                | 100 | ✓ |       |
| HLA-C    | NM_002117 | major histocompatibility complex, class I, C                | 100 | ✓ |       |
| HLA-DMA  | NM_006120 | major histocompatibility complex, class II, DM alpha        | 75  | ✓ |       |
| HLA-DMB  | NM_002118 | major histocompatibility complex, class II, DM beta         | 100 | ✓ |       |
| HLA-DOA  | NM_002119 | major histocompatibility complex, class II, DO alpha        | 100 | ✓ |       |
| HLA-DPA1 | NM_033554 | major histocompatibility complex, class II, DP alpha 1      | 60  | ✓ |       |
| HLA-DQB1 | NM_002123 | major histocompatibility complex, class II, DQ beta 1       | 100 | ✓ |       |
| HLA-DQB2 | NM_182549 | major histocompatibility complex, class II, DQ beta 2       | 60  | ✓ |       |
| HLA-DRA  | NM_019111 | major histocompatibility complex, class II, DR alpha        | 80  | ✓ |       |
| HLA-DRB3 | NM_022555 | major histocompatibility complex, class II, DR beta 3       | 75  | ✓ |       |
| HLA-DRB4 | NM_021983 | major histocompatibility complex, class II, DR beta 4       | 100 | ✓ |       |
| HLA-DRB5 | NM_002125 | major histocompatibility complex, class II, DR beta 5       | 100 | ✓ |       |
| HLA-E    | NM_005516 | major histocompatibility complex, class I, E                | 100 | ✓ |       |
| HLA-G    | NM_002127 | HLA-G histocompatibility antigen, class I, G                | 100 | ✓ |       |
| HMGCLL1  | NM_019036 | 3-hydroxymethyl-3-methylglutaryl-Coenzyme A lyase-like 1    | 100 | ✓ |       |
| HN1L     | NM_144570 | hematological and neurological expressed 1-like             | 80  | ✓ |       |
| HNRNPA1  | NM_002136 | heterogeneous nuclear ribonucleoprotein A1                  | 80  | ✓ |       |
| HNRNPK   | NM_002140 | heterogeneous nuclear ribonucleoprotein K                   | 100 | ✓ |       |
| HNRNPM   | NM_005968 | heterogeneous nuclear ribonucleoprotein M                   | 60  | ✓ |       |
| HOXD3    | NM_006898 | homeobox D3 (HOXD3)                                         | 60  | ✓ |       |
| HPD      | NM_002150 | 4-hydroxyphenylpyruvate dioxygenase                         | 100 | ✓ |       |
| HRAS     | NM_176795 | v-Ha-ras Harvey rat sarcoma viral oncogene homolog          | 38  |   | 0.000 |
| HRC      | NM_002152 | histidine rich calcium binding protein (HRC)                | 60  | ✓ |       |
| HS6ST1   | NM_004807 | heparan sulfate 6-O-sulfotransferase 1                      | 60  | ✓ |       |
| HSDL2    | NM_032303 | hydroxysteroid dehydrogenase like 2                         | 100 | ✓ |       |
| HSPC111  | NM_016391 | hypothetical protein HSPC111                                | 80  | ✓ |       |
| HSPE1    | NM_002157 | heat shock 10kDa protein 1                                  | 60  | ✓ |       |
| HTR1D    | NM_000864 | 5-hydroxytryptamine (serotonin) receptor 1D                 | 100 | ✓ |       |
| HTR1E    | NM_000865 | 5-hydroxytryptamine (serotonin) receptor 1E                 | 80  | ✓ |       |
| HTR3C    | NM_130770 | 5-hydroxytryptamine (serotonin) receptor 3, family member C | 100 | ✓ |       |
| HTR6     | NM_000871 | 5-hydroxytryptamine (serotonin) receptor 6                  | 80  | ✓ |       |
| HYAL1    | NM_007312 | hyaluronoglucosaminidase 1                                  | 100 | ✓ |       |
| HYAL2    | NM_003773 | hyaluronoglucosaminidase 2                                  | 100 | ✓ |       |
| HYAL3    | NM_003549 | hyaluronoglucosaminidase 3                                  | 100 | ✓ |       |
| HYLS1    | NM_145014 | hydrolethalus syndrome 1                                    | 80  | ✓ |       |
| ICK      | NM_014920 | intestinal cell (MAK-like) kinase                           | 60  | ✓ |       |
| ICOSLG   | NM_015259 | inducible T-cell co-stimulator ligand                       | 60  | ✓ |       |
| IFNAR2   | NM_000874 | interferon (alpha, beta and omega) receptor 2               | 80  | ✓ |       |
| IFNGR1   | NM_000416 | interferon gamma receptor 1                                 | 80  | ✓ |       |

|          |           |                                                     |     |   |       |
|----------|-----------|-----------------------------------------------------|-----|---|-------|
| IFNK     | NM_020124 | interferon, kappa                                   | 100 | ✓ |       |
| IFRD2    | NM_006764 | interferon-related developmental regulator 2        | 100 | ✓ |       |
| IFT57    | NM_018010 | intraflagellar transport 57 homolog                 | 80  | ✓ |       |
| IGF2     | NM_000612 | insulin-like growth factor 2                        | 44  |   | 0.000 |
| IGFBP2   | NM_000597 | insulin-like growth factor binding protein 2        | 80  | ✓ |       |
| IGFBP3   | NM_000598 | insulin-like growth factor binding protein 3        | 100 | ✓ |       |
| IGFBP4   | NM_001552 | insulin-like growth factor binding protein 4        | 67  | ✓ |       |
| IGFBP5   | NM_000599 | insulin-like growth factor binding protein 5        | 100 | ✓ |       |
| IGFBP6   | NM_002178 | insulin-like growth factor binding protein 6        | 80  | ✓ |       |
| IGSF10   | NM_178822 | immunoglobulin superfamily, member 10               | 60  | ✓ |       |
| IL10RA   | NM_001558 | interleukin 10 receptor, alpha                      | 100 | ✓ |       |
| IL12A    | NM_000882 | interleukin 12A                                     | 100 | ✓ |       |
| IL12RB2  | NM_001559 | interleukin 12 receptor, beta 2                     | 80  | ✓ |       |
| IL13RA1  | NM_001560 | interleukin 13 receptor, alpha 1                    | 80  | ✓ |       |
| IL13RA2  | NM_000640 | interleukin 13 receptor, alpha 2                    | 100 | ✓ |       |
| IL15     | NM_000585 | interleukin 15                                      | 75  | ✓ |       |
| IL16     | NM_004513 | interleukin 16 (lymphocyte chemoattractant factor)  | 100 | ✓ |       |
| IL17C    | NM_013278 | interleukin 17C                                     | 100 | ✓ |       |
| IL17F    | NM_052872 | interleukin 17F (IL17F)                             | 100 | ✓ |       |
| IL17RE   | NM_144640 | interleukin 17 receptor E                           | 100 | ✓ |       |
| IL18     | NM_001562 | interleukin 18 (interferon-gamma-inducing factor)   | 60  | ✓ |       |
| IL18BP   | NM_005699 | interleukin 18 binding protein                      | 80  | ✓ |       |
| IL19     | NM_013371 | interleukin 19                                      | 80  | ✓ |       |
| IL1F6    | NM_014440 | interleukin 1 family, member 6 (epsilon)            | 100 | ✓ |       |
| IL1F7    | NM_173204 | interleukin 1 family, member 7 (zeta)               | 100 | ✓ |       |
| IL1F9    | NM_019618 | interleukin 1 family, member 9 (IL1F9)              | 100 | ✓ |       |
| IL1R2    | NM_004633 | interleukin 1 receptor, type II                     | 80  | ✓ |       |
| IL1RAP   | NM_002182 | interleukin 1 receptor accessory protein            | 80  | ✓ |       |
| IL1RAPL1 | NM_014271 | interleukin 1 receptor accessory protein-like 1     | 100 | ✓ |       |
| IL1RL2   | NM_003854 | interleukin 1 receptor-like 2                       | 80  | ✓ |       |
| IL2      | NM_000586 | interleukin 2                                       | 60  | ✓ |       |
| IL23R    | NM_144701 | interleukin 23 receptor                             | 100 | ✓ |       |
| IL24     | NM_006850 | interleukin 24                                      | 100 | ✓ |       |
| IL26     | NM_018402 | interleukin 26                                      | 60  | ✓ |       |
| IL27     | NM_145659 | interleukin 27                                      | 100 | ✓ |       |
| IL27RA   | NM_004843 | interleukin 27 receptor, alpha                      | 60  | ✓ |       |
| IL28A    | NM_172138 | interleukin 28A (interferon, lambda 2)              | 100 | ✓ |       |
| IL2RA    | NM_000417 | interleukin 2 receptor, alpha                       | 100 | ✓ |       |
| IL3      | NM_000588 | interleukin 3 (colony-stimulating factor, multiple) | 80  | ✓ |       |
| IL4      | NM_000589 | interleukin 4                                       | 80  | ✓ |       |
| IL4I1    | NM_152899 | interleukin 4 induced 1                             | 100 | ✓ |       |
| IL5RA    | NM_000564 | interleukin 5 receptor, alpha                       | 80  | ✓ |       |
| IL6ST    | NM_002184 | interleukin 6 signal transducer                     | 100 | ✓ |       |
| IL7      | NM_000880 | interleukin 7                                       | 80  | ✓ |       |
| IL7R     | NM_002185 | interleukin 7 receptor                              | 60  | ✓ |       |
| IL9R     | NM_002186 | interleukin 9 receptor                              | 100 | ✓ |       |

|          |           |                                                                                         |     |   |  |
|----------|-----------|-----------------------------------------------------------------------------------------|-----|---|--|
| IMP4     | NM_033416 | IMP4, U3 small nucleolar ribonucleoprotein, homolog                                     | 100 | ✓ |  |
| IMPG2    | NM_016247 | interphotoreceptor matrix proteoglycan 2                                                | 80  | ✓ |  |
| INA      | NM_032727 | internexin neuronal intermediate filament protein, alpha                                | 100 | ✓ |  |
| INHA     | NM_002191 | inhibin, alpha                                                                          | 60  | ✓ |  |
| INHBB    | NM_002193 | inhibin, beta B                                                                         | 100 | ✓ |  |
| IPO4     | NM_024658 | importin 4                                                                              | 100 | ✓ |  |
| IRF2BP2  | NM_182972 | interferon regulatory factor 2 binding protein 2                                        | 60  | ✓ |  |
| IRS4     | NM_003604 | insulin receptor substrate 4                                                            | 80  | ✓ |  |
| ISCU     | NM_014301 | iron-sulfur cluster scaffold homolog                                                    | 60  | ✓ |  |
| ITGAE    | NM_002208 | integrin, alpha E (antigen CD103, human mucosal lymphocyte antigen 1; alpha polypeptide | 75  | ✓ |  |
| ITIH1    | NM_002215 | inter-alpha (globulin) inhibitor H1                                                     | 100 | ✓ |  |
| ITM2B    | NM_021999 | integral membrane protein 2B                                                            | 100 | ✓ |  |
| ITPR3    | NM_002224 | inositol 1,4,5-triphosphate receptor, type 3                                            | 100 | ✓ |  |
| IYD      | NM_203395 | iodotyrosine deiodinase                                                                 | 80  | ✓ |  |
| JPH4     | NM_032452 | junctophilin 4                                                                          | 60  | ✓ |  |
| JTV1     | NM_006303 | JTV1 gene                                                                               | 100 | ✓ |  |
| KDEL1    | NM_006801 | KDEL (Lys-Asp-Glu-Leu) endoplasmic reticulum protein retention receptor 1               | 80  | ✓ |  |
| KDEL2    | NM_006854 | KDEL (Lys-Asp-Glu-Leu) endoplasmic reticulum protein retention receptor 2               | 100 | ✓ |  |
| KDEL3    | NM_006855 | KDEL (Lys-Asp-Glu-Leu) endoplasmic reticulum protein retention receptor 3               | 100 | ✓ |  |
| KIAA0090 | NM_015047 | KIAA0090                                                                                | 80  | ✓ |  |
| KIAA0195 | NM_014738 | KIAA0195                                                                                | 100 | ✓ |  |
| KIAA0701 | NM_015054 | KIAA0701 protein                                                                        | 60  | ✓ |  |
| KIAA1128 | NM_018999 | KIAA1128                                                                                | 80  | ✓ |  |
| KIAA1333 | NM_017769 | KIAA1333                                                                                | 60  | ✓ |  |
| KIAA1344 | XM_051699 | KIAA1344                                                                                | 80  | ✓ |  |
| KIF5A    | NM_004984 | kinesin family member 5A                                                                | 100 | ✓ |  |
| KIR2DL1  | NM_014218 | killer cell immunoglobulin-like receptor, two domains, long cytoplasmic tail, 1         | 80  | ✓ |  |
| KIR2DL2  | NM_014219 | killer cell immunoglobulin-like receptor, two domains, long cytoplasmic tail, 2         | 100 | ✓ |  |
| KIR2DL3  | NM_014511 | killer cell immunoglobulin-like receptor, two domains, long cytoplasmic tail, 3         | 80  | ✓ |  |
| KIR2DS5  | NM_014513 | killer cell immunoglobulin-like receptor, two domains, short cytoplasmic tail, 5        | 60  | ✓ |  |
| KIR3DL2  | NM_006737 | killer cell immunoglobulin-like receptor, three domains, long cytoplasmic tail, 2       | 100 | ✓ |  |
| KIR3DL3  | NM_153443 | killer cell immunoglobulin-like receptor, three domains, long cytoplasmic tail, 3       | 100 | ✓ |  |
| KLHL2    | NM_007246 | kelch-like 2, Mayven (Drosophila)                                                       | 80  | ✓ |  |
| KLRB1    | NM_002258 | killer cell lectin-like receptor subfamily B, member 1                                  | 80  | ✓ |  |
| KLRC1    | NM_002259 | killer cell lectin-like receptor subfamily C, member 1                                  | 100 | ✓ |  |
| KLRC2    | NM_002260 | killer cell lectin-like receptor subfamily C, member 2                                  | 80  | ✓ |  |
| KLRC3    | NM_002261 | killer cell lectin-like receptor subfamily C, member 3                                  | 100 | ✓ |  |
| KLRC4    | NM_013431 | killer cell lectin-like receptor subfamily C, member 4                                  | 100 | ✓ |  |
| KLRF1    | NM_016523 | killer cell lectin-like receptor subfamily F, member 1                                  | 100 | ✓ |  |
| KLRG1    | NM_005810 | killer cell lectin-like receptor subfamily G, member 1                                  | 60  | ✓ |  |
| KMO      | NM_003679 | kynurenine 3-monooxygenase (kynurenine 3-hydroxylase)                                   | 100 | ✓ |  |
| KPNA1    | NM_002264 | karyopherin alpha 1 (importin alpha 5)                                                  | 100 | ✓ |  |
| KPNA2    | NM_002266 | karyopherin alpha 2 (RAG cohort 1, importin alpha 1)                                    | 80  | ✓ |  |
| KPNA3    | NM_002267 | karyopherin alpha 3 (importin alpha 4)                                                  | 100 | ✓ |  |
| KPNA4    | NM_002268 | karyopherin alpha 4 (importin alpha 3)                                                  | 60  | ✓ |  |
| KPNA5    | NM_002269 | karyopherin alpha 5 (importin alpha 6)                                                  | 100 | ✓ |  |

|           |              |                                                                                   |     |   |       |
|-----------|--------------|-----------------------------------------------------------------------------------|-----|---|-------|
| KRAS      | NM_033360    | v-Ki-ras2 Kirsten rat sarcoma viral oncogene homolog                              | 45  |   | 0.000 |
| KRR1      | NM_007043    | KRR1, small subunit (SSU) processome component, homolog                           | 100 | ✓ |       |
| KRT1      | NM_006121    | keratin 1 (epidermolytic hyperkeratosis)                                          | 100 | ✓ |       |
| KRT19     | NM_002276    | keratin 19                                                                        | 100 | ✓ |       |
| KRT8      | NM_002273    | keratin 8                                                                         | 100 | ✓ |       |
| KRTAP13-4 | NM_181600    | keratin associated protein 13-4                                                   | 80  | ✓ |       |
| KSR1      | XM_290793    | kinase suppressor of ras 1                                                        | 60  | ✓ |       |
| KTN1      | NM_182926    | kinectin 1 (kinesin receptor)                                                     | 100 | ✓ |       |
| L1CAM     | NM_000425    | L1 cell adhesion molecule                                                         | 100 | ✓ |       |
| L1TD1     | NM_019079    | LINE-1 type transposase domain containing 1                                       | 100 | ✓ |       |
| L2HGDH    | NM_024884    | L-2-hydroxyglutarate dehydrogenase                                                | 100 | ✓ |       |
| LAIR1     | NM_002287    | leukocyte-associated immunoglobulin-like receptor 1                               | 80  | ✓ |       |
| LAT1-3TM  | NM_031211    | SLC7A5 pseudogene                                                                 | 80  | ✓ |       |
| LAX1      | NM_017773    | lymphocyte transmembrane adaptor 1                                                | 60  | ✓ |       |
| LAYN      | NM_178834    | layilin                                                                           | 100 | ✓ |       |
| LCK       | NM_005356    | lymphocyte-specific protein tyrosine kinase                                       | 44  |   | 0.011 |
| LCN10     | NM_001001712 | lipocalin 10                                                                      | 100 | ✓ |       |
| LCP1      | NM_002298    | lymphocyte cytosolic protein 1                                                    | 60  | ✓ |       |
| LDLR      | NM_000527    | low density lipoprotein receptor                                                  | 60  | ✓ |       |
| LDLRAP1   | NM_015627    | low density lipoprotein receptor adaptor protein 1                                | 80  | ✓ |       |
| LENG8     | NM_052925    | leukocyte receptor cluster (LRC) member 8                                         | 80  | ✓ |       |
| LENG9     | NM_198988    | leukocyte receptor cluster (LRC) member 9                                         | 100 | ✓ |       |
| LEP       | NM_000230    | leptin (LEP)                                                                      | 100 | ✓ |       |
| LEPR      | NM_002303    | leptin receptor                                                                   | 100 | ✓ |       |
| LEPREL1   | NM_018192    | leprecan-like 1                                                                   | 80  | ✓ |       |
| LGALS1    | NM_002305    | lectin, galactoside-binding, soluble, 1                                           | 80  | ✓ |       |
| LGALS4    | NM_006149    | lectin, galactoside-binding, soluble, 4                                           | 60  | ✓ |       |
| LGALS9    | NM_002308    | lectin, galactoside-binding, soluble, 9                                           | 60  | ✓ |       |
| LGI1      | NM_005097    | leucine-rich, glioma inactivated 1                                                | 80  | ✓ |       |
| LGR6      | NM_021636    | leucine-rich repeat-containing G protein-coupled receptor 6                       | 80  | ✓ |       |
| LGTN      | NM_006893    | ligatin                                                                           | 100 | ✓ |       |
| LILRA3    | NM_006865    | leukocyte immunoglobulin-like receptor, subfamily A (without TM domain), member 3 | 60  | ✓ |       |
| LILRA4    | NM_012276    | leukocyte immunoglobulin-like receptor, subfamily A (with TM domain), member 4    | 67  | ✓ |       |
| LILRA5    | NM_021250    | leukocyte immunoglobulin-like receptor, subfamily A (with TM domain), member 5    | 60  | ✓ |       |
| LILRP2    | NM_024317    | leukocyte immunoglobulin-like receptor pseudogene 2                               | 80  | ✓ |       |
| LMAN1     | NM_005570    | lectin, mannose-binding, 1                                                        | 100 | ✓ |       |
| LMBR1L    | NM_018113    | limb region 1 homolog (mouse)-like                                                | 100 | ✓ |       |
| LMNA      | NM_170707    | lamin A/C                                                                         | 100 | ✓ |       |
| LMNB2     | NM_032737    | lamin B2                                                                          | 100 | ✓ |       |
| LOC339483 | NM_178546    | hypothetical LOC339483                                                            | 60  | ✓ |       |
| LOC339879 | XM_291054    | hypothetical LOC339879                                                            | 60  | ✓ |       |
| LOC342897 | NM_001001414 | similar to F-box only protein 2                                                   | 100 | ✓ |       |
| LOC389465 | NM_003142    | Sjogren syndrome antigen B (autoantigen La)                                       | 100 | ✓ |       |
| LOC399942 | NM_006082    | tubulin, alpha 1b                                                                 | 80  | ✓ |       |
| LRCH4     | NM_002319    | leucine-rich repeats and calponin homology (CH) domain containing 4               | 100 | ✓ |       |
| LRP10     | NM_014045    | low density lipoprotein receptor-related protein 10                               | 60  | ✓ |       |

|           |              |                                                                                        |     |   |       |
|-----------|--------------|----------------------------------------------------------------------------------------|-----|---|-------|
| LRP3      | NM_002333    | low density lipoprotein receptor-related protein 3                                     | 100 | ✓ |       |
| LRRRC40   | NM_017768    | leucine rich repeat containing 40                                                      | 75  | ✓ |       |
| LSAMP     | NM_002338    | limbic system-associated membrane protein                                              | 80  | ✓ |       |
| LSM3      | NM_014463    | LSM3 homolog, U6 small nuclear RNA associated                                          | 100 | ✓ |       |
| LSM4      | NM_012321    | LSM4 homolog, U6 small nuclear RNA associated                                          | 80  | ✓ |       |
| LSM5      | NM_012322    | LSM5 homolog, U6 small nuclear RNA associated                                          | 60  | ✓ |       |
| LSM6      | NM_007080    | LSM6 homolog, U6 small nuclear RNA associated                                          | 80  | ✓ |       |
| LTBR      | NM_002342    | lymphotoxin beta receptor                                                              | 100 | ✓ |       |
| LY6H      | NM_002347    | lymphocyte antigen 6 complex, locus H                                                  | 80  | ✓ |       |
| LY75      | NM_002349    | lymphocyte antigen 75                                                                  | 100 | ✓ |       |
| LY96      | NM_015364    | lymphocyte antigen 96                                                                  | 80  | ✓ |       |
| LYAR      | NM_017816    | Ly1 antibody reactive homolog                                                          | 100 | ✓ |       |
| LYRM1     | NM_020424    | LYR motif containing 1                                                                 | 60  | ✓ |       |
| LYRM2     | NM_020466    | LYR motif containing 2                                                                 | 80  | ✓ |       |
| LYRM4     | NM_020408    | LYR motif containing 4                                                                 | 80  | ✓ |       |
| LYRM5     | NM_001001660 | LYR motif containing 5                                                                 | 100 | ✓ |       |
| LYRM7     | NM_181705    | Lyrm7 homolog                                                                          | 60  | ✓ |       |
| MAGOHB    | NM_018048    | mago-nashi homolog B                                                                   | 100 | ✓ |       |
| MAGT1     | NM_032121    | magnesium transporter 1                                                                | 100 | ✓ |       |
| MAP3K7IP1 | NM_006116    | mitogen-activated protein kinase kinase kinase 7 interacting protein 1                 | 100 | ✓ |       |
| MAPK15    | NM_139021    | mitogen-activated protein kinase 15                                                    | 46  |   | 0.000 |
| MAPRE1    | NM_012325    | microtubule-associated protein, RP/EB family, member 1                                 | 100 | ✓ |       |
| MARVELD2  | NM_144724    | MARVEL domain containing 2 (MARVELD2)                                                  | 80  | ✓ |       |
| MBNL1     | NM_021038    | muscleblind-like (Drosophila) (MBNL1)                                                  | 60  | ✓ |       |
| MCF2      | NM_005369    | MCF.2 cell line derived transforming sequence                                          | 60  | ✓ |       |
| MCM6      | NM_005915    | minichromosome maintenance complex component 6                                         | 60  | ✓ |       |
| MCTS1     | NM_014060    | malignant T cell amplified sequence 1                                                  | 100 | ✓ |       |
| MDK       | NM_002391    | midkine (neurite growth-promoting factor 2)                                            | 100 | ✓ |       |
| ME1       | NM_002395    | malic enzyme 1, NADP(+)-dependent, cytosolic                                           | 100 | ✓ |       |
| ME2       | NM_002396    | malic enzyme 2, NAD(+)-dependent, mitochondrial                                        | 100 | ✓ |       |
| MECR      | NM_016011    | mitochondrial trans-2-enoyl-CoA reductase                                              | 100 | ✓ |       |
| MED30     | NM_080651    | mediator complex subunit 30                                                            | 100 | ✓ |       |
| METRNL    | NM_024042    | meteorin, glial cell differentiation regulator                                         | 80  | ✓ |       |
| MFSD1     | NM_022736    | major facilitator superfamily domain containing 1                                      | 80  | ✓ |       |
| MGAT4B    | NM_014275    | mannosyl (alpha-1,3-)-glycoprotein beta-1,4-N-acetylglucosaminyltransferase, isozyme B | 60  | ✓ |       |
| MGC19604  | NM_080665    | similar to RIKEN cDNA B230118G17 gene                                                  | 100 | ✓ |       |
| MGC4172   | NM_024308    | short-chain dehydrogenase/reductase                                                    | 100 | ✓ |       |
| MICA      | NM_000247    | MHC class I polypeptide-related sequence A                                             | 100 | ✓ |       |
| MICALL1   | NM_033386    | MICAL-like 1                                                                           | 100 | ✓ |       |
| MICB      | NM_005931    | MHC class I polypeptide-related sequence B                                             | 100 | ✓ |       |
| MIER3     | NM_152622    | mesoderm induction early response 1, family member 3                                   | 60  | ✓ |       |
| MIST      | NM_052964    | mast cell immunoreceptor signal transducer                                             | 100 | ✓ |       |
| MKRN1     | NM_013446    | makorin, ring finger protein, 1                                                        | 60  | ✓ |       |
| MKRN4     | NM_030757    | makorin, ring finger protein, 4                                                        | 100 | ✓ |       |
| MLC1      | NM_015166    | megalencephalic leukoencephalopathy with subcortical cysts 1                           | 100 | ✓ |       |
| MLF1IP    | NM_024629    | MLF1 interacting protein                                                               | 80  | ✓ |       |



|         |              |                                                                             |     |   |  |
|---------|--------------|-----------------------------------------------------------------------------|-----|---|--|
| MMD     | NM_012329    | monocyte to macrophage differentiation-associated                           | 100 | ✓ |  |
| MMD2    | NM_198403    | monocyte to macrophage differentiation-associated 2                         | 100 | ✓ |  |
| MOBP    | NM_006501    | myelin-associated oligodendrocyte basic protein                             | 100 | ✓ |  |
| MPL     | NM_005373    | myeloproliferative leukemia virus oncogene                                  | 100 | ✓ |  |
| MPPED2  | NM_001584    | metallophosphoesterase domain containing 2                                  | 60  | ✓ |  |
| MR1     | NM_001531    | major histocompatibility complex, class I-related                           | 80  | ✓ |  |
| MRPL12  | NM_002949    | mitochondrial ribosomal protein L12                                         | 100 | ✓ |  |
| MRPL37  | NM_016491    | mitochondrial ribosomal protein L37                                         | 100 | ✓ |  |
| MRPS16  | NM_016065    | mitochondrial ribosomal protein S16                                         | 80  | ✓ |  |
| MRTO4   | NM_016183    | mRNA turnover 4 homolog                                                     | 80  | ✓ |  |
| MS4A10  | NM_206893    | membrane-spanning 4-domains, subfamily A, member 10                         | 80  | ✓ |  |
| MS4A3   | NM_006138    | membrane-spanning 4-domains, subfamily A, member 3                          | 80  | ✓ |  |
| MS4A5   | NM_023945    | membrane-spanning 4-domains, subfamily A, member 5                          | 100 | ✓ |  |
| MS4A6A  | NM_022349    | membrane-spanning 4-domains, subfamily A, member 6A                         | 100 | ✓ |  |
| MS4A6E  | NM_139249    | membrane-spanning 4-domains, subfamily A, member 6E                         | 100 | ✓ |  |
| MS4A8B  | NM_031457    | membrane-spanning 4-domains, subfamily A, member 8B                         | 100 | ✓ |  |
| MSI1    | NM_002442    | musashi homolog 1                                                           | 60  | ✓ |  |
| MSN     | NM_002444    | moesin                                                                      | 100 | ✓ |  |
| MSR1    | NM_002445    | macrophage scavenger receptor 1                                             | 100 | ✓ |  |
| MSRB3   | NM_198080    | methionine sulfoxide reductase B3                                           | 100 | ✓ |  |
| MT1F    | NM_005949    | metallothionein 1F                                                          | 100 | ✓ |  |
| MT3     | NM_005954    | metallothionein 3                                                           | 100 | ✓ |  |
| MTO1    | NM_012123    | mitochondrial translation optimization 1 homolog                            | 100 | ✓ |  |
| MTSS1   | NM_014751    | metastasis suppressor 1                                                     | 100 | ✓ |  |
| MTUS1   | NM_001001924 | mitochondrial tumor suppressor 1                                            | 100 | ✓ |  |
| MTX1    | NM_002455    | metaxin 1                                                                   | 80  | ✓ |  |
| MYO18A  | NM_078471    | myosin XVIIIa                                                               | 80  | ✓ |  |
| NARF    | NM_012336    | nuclear prelamin A recognition factor                                       | 80  | ✓ |  |
| NCBP2   | NM_007362    | nuclear cap binding protein subunit 2                                       | 100 | ✓ |  |
| NCF1    | NM_000265    | neutrophil cytosolic factor 1, (chronic granulomatous disease, autosomal 1) | 80  | ✓ |  |
| NCF4    | NM_000631    | neutrophil cytosolic factor 4, 40kDa                                        | 100 | ✓ |  |
| NCL     | NM_005381    | nucleolin                                                                   | 100 | ✓ |  |
| NCLN    | NM_020170    | nicalin homolog                                                             | 100 | ✓ |  |
| NCOA7   | NM_181782    | nuclear receptor coactivator 7                                              | 100 | ✓ |  |
| NCOR2   | NM_006312    | nuclear receptor co-repressor 2                                             | 100 | ✓ |  |
| NCR1    | NM_004829    | natural cytotoxicity triggering receptor 1                                  | 100 | ✓ |  |
| NCR2    | NM_004828    | natural cytotoxicity triggering receptor 2                                  | 100 | ✓ |  |
| NCR3    | NM_147130    | natural cytotoxicity triggering receptor 3                                  | 80  | ✓ |  |
| NDST4   | NM_022569    | N-deacetylase/N-sulfotransferase (heparan glucosaminyl) 4                   | 60  | ✓ |  |
| NDUFA12 | NM_018838    | NADH dehydrogenase (ubiquinone) 1 alpha subcomplex, 12                      | 100 | ✓ |  |
| NDUFA13 | NM_015965    | NADH dehydrogenase (ubiquinone) 1 alpha subcomplex, 13                      | 100 | ✓ |  |
| NDUFAF2 | NM_174889    | NADH dehydrogenase (ubiquinone) 1 alpha subcomplex, assembly factor 2       | 100 | ✓ |  |
| NDUFB2  | NM_004546    | NADH dehydrogenase (ubiquinone) 1 beta subcomplex, 2, 8kDa                  | 80  | ✓ |  |
| NDUFS1  | NM_005006    | NADH dehydrogenase (ubiquinone) Fe-S protein 1                              | 100 | ✓ |  |
| NEIL2   | NM_145043    | nei like 2                                                                  | 100 | ✓ |  |
| NETO1   | NM_138966    | neuropilin (NRP) and tolloid (TLL)-like 1                                   | 100 | ✓ |  |

|          |              |                                                                   |     |   |  |
|----------|--------------|-------------------------------------------------------------------|-----|---|--|
| NEURL    | NM_004210    | neuralized homolog                                                | 60  | ✓ |  |
| NEUROG1  | NM_006161    | neurogenin 1                                                      | 100 | ✓ |  |
| NGB      | NM_021257    | neuroglobin                                                       | 100 | ✓ |  |
| NGF      | NM_002506    | nerve growth factor                                               | 80  | ✓ |  |
| NGFR     | NM_002507    | nerve growth factor receptor (TNFR superfamily, member 16)        | 100 | ✓ |  |
| NGFRAP1  | NM_014380    | nerve growth factor receptor (TNFRSF16) associated protein 1      | 100 | ✓ |  |
| NHLRC2   | NM_198514    | NHL repeat containing 2                                           | 75  | ✓ |  |
| NODAL    | NM_018055    | nodal homolog                                                     | 100 | ✓ |  |
| NOG      | NM_005450    | noggin                                                            | 60  | ✓ |  |
| NOLA2    | NM_017838    | nucleolar protein family A, member 2 (H/ACA small nucleolar RNPs) | 100 | ✓ |  |
| NOTCH2NL | NM_203458    | Notch homolog 2                                                   | 80  | ✓ |  |
| N-PAC    | NM_032569    | cytokine-like nuclear factor n-pac                                | 100 | ✓ |  |
| NPM1     | NM_002520    | nucleophosmin (nucleolar phosphoprotein B23, numatrin)            | 100 | ✓ |  |
| NPSR1    | NM_207172    | neuropeptide S receptor 1                                         | 80  | ✓ |  |
| NPTN     | NM_012428    | neuroplastin                                                      | 100 | ✓ |  |
| NPTXR    | NM_014293    | neuronal pentraxin receptor                                       | 60  | ✓ |  |
| NR2F2    | NM_021005    | nuclear receptor subfamily 2, group F, member 2                   | 80  | ✓ |  |
| NRAS     | NM_002524    | neuroblastoma RAS viral (v-ras) oncogene homolog                  | 60  | ✓ |  |
| NRBF2    | NM_030759    | nuclear receptor binding factor 2                                 | 100 | ✓ |  |
| NRG1     | NM_004495    | neuregulin 1                                                      | 60  | ✓ |  |
| NRG2     | NM_004883    | neuregulin 2                                                      | 100 | ✓ |  |
| NRIP2    | NM_031474    | nuclear receptor interacting protein 2                            | 80  | ✓ |  |
| NRP1     | NM_003873    | neuropilin 1                                                      | 100 | ✓ |  |
| NRP2     | NM_003872    | neuropilin 2                                                      | 100 | ✓ |  |
| NRXN3    | NM_004796    | neurexin 3                                                        | 80  | ✓ |  |
| NT5C2    | NM_012229    | 5'-nucleotidase, cytosolic II                                     | 60  | ✓ |  |
| NTF3     | NM_002527    | neurotrophin 3                                                    | 80  | ✓ |  |
| NTF4     | NM_006179    | neurotrophin 4                                                    | 100 | ✓ |  |
| NUDT13   | NM_015901    | nudix (nucleoside diphosphate linked moiety X)-type motif 13      | 60  | ✓ |  |
| NUMBL    | NM_004756    | numb homolog                                                      | 100 | ✓ |  |
| NUP205   | XM_371954    | nucleoporin 205kDa                                                | 100 | ✓ |  |
| NUP35    | NM_138285    | nucleoporin 35kDa                                                 | 100 | ✓ |  |
| NUP85    | NM_024844    | nucleoporin 85kDa                                                 | 100 | ✓ |  |
| NUP93    | NM_014669    | nucleoporin 93kDa                                                 | 100 | ✓ |  |
| NXN      | NM_022463    | nucleoredoxin                                                     | 100 | ✓ |  |
| NXNL1    | NM_138454    | nucleoredoxin-like 1                                              | 100 | ✓ |  |
| OGFOD2   | NM_024623    | 2-oxoglutarate and iron-dependent oxygenase domain containing 2   | 100 | ✓ |  |
| OGFR     | NM_007346    | opioid growth factor receptor                                     | 100 | ✓ |  |
| OMA1     | NM_145243    | OMA1 homolog, zinc metallopeptidase                               | 100 | ✓ |  |
| OPRS1    | NM_005866    | opioid receptor, sigma 1                                          | 75  | ✓ |  |
| OR10R2   | NM_001004472 | olfactory receptor, family 10, subfamily R, member 2              | 100 | ✓ |  |
| OR10S1   | NM_001004474 | olfactory receptor, family 10, subfamily S, member 1              | 100 | ✓ |  |
| OR10X1   | NM_001004477 | olfactory receptor, family 10, subfamily X, member 1              | 80  | ✓ |  |
| OR13A1   | NM_001004297 | olfactory receptor, family 13, subfamily A, member 1              | 80  | ✓ |  |
| OR13D1   | NM_001004484 | olfactory receptor, family 13, subfamily D, member 1              | 80  | ✓ |  |
| OR14A16  | NM_001001966 | olfactory receptor, family 14, subfamily A, member 16             | 100 | ✓ |  |

|          |              |                                                                                                  |     |   |  |
|----------|--------------|--------------------------------------------------------------------------------------------------|-----|---|--|
| OR1B1    | NM_001004450 | olfactory receptor, family 1, subfamily B, member 1                                              | 100 | ✓ |  |
| OR1S1    | NM_001004458 | olfactory receptor, family 1, subfamily S, member 1                                              | 100 | ✓ |  |
| OR1S2    | NM_001004459 | olfactory receptor, family 1, subfamily S, member 2                                              | 100 | ✓ |  |
| OR2C3    | NM_198074    | olfactory receptor, family 2, subfamily C, member 3                                              | 100 | ✓ |  |
| OR2D3    | NM_001004684 | olfactory receptor, family 2, subfamily D, member 3                                              | 100 | ✓ |  |
| OR2G2    | NM_001001915 | olfactory receptor, family 2, subfamily G, member 2                                              | 100 | ✓ |  |
| OR2G3    | NM_001001914 | olfactory receptor, family 2, subfamily G, member 3                                              | 100 | ✓ |  |
| OR2K2    | NM_205859    | olfactory receptor, family 2, subfamily K, member 2                                              | 100 | ✓ |  |
| OR2L3    | NM_001004687 | olfactory receptor, family 2, subfamily L, member 3                                              | 100 | ✓ |  |
| OR2T1    | XM_060316    | olfactory receptor, family 2, subfamily T, member 1                                              | 100 | ✓ |  |
| OR2T27   | NM_001001824 | olfactory receptor, family 2, subfamily T, member 27                                             | 80  | ✓ |  |
| OR2T4    | NM_001004696 | olfactory receptor, family 2, subfamily T, member 4                                              | 80  | ✓ |  |
| OR2T5    | NM_001004697 | olfactory receptor, family 2, subfamily T, member 5                                              | 100 | ✓ |  |
| OR4C3    | NM_001004702 | olfactory receptor, family 4, subfamily C, member 3                                              | 100 | ✓ |  |
| OR4D1    | NM_012374    | olfactory receptor, family 4, subfamily D, member 1                                              | 100 | ✓ |  |
| OR4D11   | NM_001004706 | olfactory receptor, family 4, subfamily D, member 11                                             | 100 | ✓ |  |
| OR4K17   | NM_001004715 | olfactory receptor, family 4, subfamily K, member 17                                             | 80  | ✓ |  |
| OR51D1   | NM_001004751 | olfactory receptor, family 51, subfamily D, member 1                                             | 80  | ✓ |  |
| OR51V1   | NM_001004760 | olfactory receptor, family 51, subfamily V, member 1                                             | 100 | ✓ |  |
| OR52B2   | XM_171528    | olfactory receptor, family 52, subfamily B, member 2                                             | 100 | ✓ |  |
| OR52B6   | NM_001005162 | olfactory receptor, family 52, subfamily B, member 6                                             | 100 | ✓ |  |
| OR52L1   | NM_001005173 | olfactory receptor, family 52, subfamily L, member 1                                             | 100 | ✓ |  |
| OR56B1   | NM_001005180 | olfactory receptor, family 56, subfamily B, member 1                                             | 100 | ✓ |  |
| OR5C1    | XM_373316    | olfactory receptor, family 5, subfamily C, member 1                                              | 100 | ✓ |  |
| OR5M1    | NM_001004740 | olfactory receptor, family 5, subfamily M, member 1                                              | 100 | ✓ |  |
| OR5M10   | NM_001004741 | olfactory receptor, family 5, subfamily M, member 10                                             | 100 | ✓ |  |
| OR6B3    | NM_173351    | olfactory receptor, family 6, subfamily B, member 3                                              | 100 | ✓ |  |
| OR6V1    | NM_001001667 | olfactory receptor, family 6, subfamily V, member 1                                              | 100 | ✓ |  |
| OR8G5    | NM_001005198 | olfactory receptor, family 8, subfamily G, member 5                                              | 100 | ✓ |  |
| OR8S1    | NM_001005203 | olfactory receptor, family 8, subfamily S, member 1                                              | 100 | ✓ |  |
| OR9Q2    | XM_166915    | olfactory receptor, family 9, subfamily Q, member 2                                              | 100 | ✓ |  |
| ORM2     | NM_000608    | orosomuroid 2                                                                                    | 100 | ✓ |  |
| OSCAR    | NM_130771    | osteoclast associated, immunoglobulin-like receptor                                              | 100 | ✓ |  |
| OSMR     | NM_003999    | oncostatin M receptor                                                                            | 80  | ✓ |  |
| P4HA3    | NM_182904    | procollagen-proline, 2-oxoglutarate 4-dioxygenase (proline 4-hydroxylase), alpha polypeptide III | 100 | ✓ |  |
| PAEP     | NM_002571    | progesterone-associated endometrial protein                                                      | 80  | ✓ |  |
| PAFAH1B1 | NM_000430    | platelet-activating factor acetylhydrolase, isoform Ib, alpha subunit 45kDa                      | 60  | ✓ |  |
| PAGE4    | NM_007003    | P antigen family, member 4                                                                       | 60  | ✓ |  |
| PAN2     | NM_014871    | PAN2 polyA specific ribonuclease subunit homolog                                                 | 60  | ✓ |  |
| PAQR5    | NM_017705    | progesterone and adipoQ receptor family member V                                                 | 100 | ✓ |  |
| PAQR6    | NM_024897    | progesterone and adipoQ receptor family member VI                                                | 100 | ✓ |  |
| PCDH1    | NM_002587    | protocadherin 1                                                                                  | 60  | ✓ |  |
| PCDH11Y  | NM_032971    | protocadherin 11 Y-linked                                                                        | 80  | ✓ |  |
| PCDHGA8  | NM_014004    | protocadherin gamma subfamily A, 8                                                               | 80  | ✓ |  |
| PCLO     | NM_033026    | piccolo (presynaptic cytomatrix protein)                                                         | 60  | ✓ |  |
| PCSK7    | NM_004716    | proprotein convertase subtilisin/kexin type 7                                                    | 80  | ✓ |  |

|          |              |                                                                         |     |   |       |
|----------|--------------|-------------------------------------------------------------------------|-----|---|-------|
| PDAP1    | NM_014891    | PDGFA associated protein 1                                              | 100 | ✓ |       |
| PDC      | NM_002597    | phosducin                                                               | 100 | ✓ |       |
| PDCC1LG2 | NM_025239    | programmed cell death 1 ligand 2                                        | 100 | ✓ |       |
| PDCL     | NM_005388    | phosducin-like                                                          | 100 | ✓ |       |
| PDE5A    | NM_001083    | phosphodiesterase 5A, cGMP-specific                                     | 80  | ✓ |       |
| PDGFD    | NM_025208    | platelet derived growth factor D                                        | 100 | ✓ |       |
| PDILT    | NM_174924    | protein disulfide isomerase-like protein of the testis                  | 100 | ✓ |       |
| PDZK1    | NM_002614    | PDZ domain containing 1                                                 | 80  | ✓ |       |
| PEA15    | NM_003768    | phosphoprotein enriched in astrocytes 15                                | 100 | ✓ |       |
| PECAM1   | NM_000442    | platelet/endothelial cell adhesion molecule                             | 100 | ✓ |       |
| PFDN6    | NM_014260    | prefoldin subunit 6                                                     | 80  | ✓ |       |
| PHB2     | NM_007273    | prohibitin 2                                                            | 100 | ✓ |       |
| PHKG1    | NM_006213    | phosphorylase kinase, gamma 1                                           | 60  | ✓ |       |
| PIAS1    | NM_016166    | protein inhibitor of activated STAT, 1                                  | 60  | ✓ |       |
| PIB5PA   | NM_001002837 | phosphatidylinositol (4,5) bisphosphate 5-phosphatase, A                | 60  | ✓ |       |
| PIGX     | NM_017861    | phosphatidylinositol glycan anchor biosynthesis                         | 100 | ✓ |       |
| PILRA    | NM_013439    | paired immunoglobulin-like type 2 receptor alpha                        | 100 | ✓ |       |
| PITPNA   | NM_006224    | phosphatidylinositol transfer protein, alpha                            | 80  | ✓ |       |
| PITPNM2  | NM_020845    | phosphatidylinositol transfer protein, membrane-associated 2            | 60  | ✓ |       |
| PITPNM3  | NM_031220    | PITPNM family member 3                                                  | 60  | ✓ |       |
| PKD2L1   | NM_016112    | polycystic kidney disease 2-like 1                                      | 60  | ✓ |       |
| PLA2R1   | NM_007366    | phospholipase A2 receptor 1                                             | 80  | ✓ |       |
| PLCL1    | NM_006226    | phospholipase C-like 1                                                  | 80  | ✓ |       |
| PLG      | NM_000301    | plasminogen                                                             | 100 | ✓ |       |
| PLK1     | NM_005030    | polo-like kinase 1                                                      | 17  |   | 0.001 |
| PLOD1    | NM_000302    | procollagen-lysine 1, 2-oxoglutarate 5-dioxygenase 1                    | 100 | ✓ |       |
| PLOD3    | NM_001084    | procollagen-lysine, 2-oxoglutarate 5-dioxygenase 3                      | 100 | ✓ |       |
| PLXDC1   | NM_020405    | plexin domain containing 1                                              | 80  | ✓ |       |
| PLXDC2   | NM_032812    | plexin domain containing 2                                              | 100 | ✓ |       |
| PLXNA1   | NM_032242    | plexin A1                                                               | 60  | ✓ |       |
| PLXND1   | NM_015103    | plexin D1                                                               | 100 | ✓ |       |
| PNN      | NM_002687    | pinin, desmosome associated protein                                     | 80  | ✓ |       |
| PNRC1    | NM_006813    | proline-rich nuclear receptor coactivator 1                             | 80  | ✓ |       |
| PNRC2    | NM_017761    | proline-rich nuclear receptor coactivator 2                             | 100 | ✓ |       |
| POFUT1   | NM_015352    | protein O-fucosyltransferase 1                                          | 60  | ✓ |       |
| POLA1    | NM_016937    | polymerase (DNA directed), alpha 1, catalytic subunit                   | 57  |   | 0.003 |
| POLG     | NM_002693    | polymerase (DNA directed), gamma                                        | 60  | ✓ |       |
| POLR2A   | NM_000937    | polymerase (RNA) II (DNA directed) polypeptide A                        | 60  | ✓ |       |
| POLR2I   | NM_006233    | polymerase (RNA) II (DNA directed) polypeptide I                        | 80  | ✓ |       |
| POM121   | NM_172020    | POM121 membrane glycoprotein                                            | 100 | ✓ |       |
| PPP2R2D  | NM_001003656 | protein phosphatase 2, regulatory subunit B, delta isoform              | 80  | ✓ |       |
| PPP3R2   | NM_147180    | protein phosphatase 3 (formerly 2B), regulatory subunit B, beta isoform | 60  | ✓ |       |
| PPRC1    | NM_015062    | peroxisome proliferator-activated receptor gamma, coactivator-related 1 | 100 | ✓ |       |
| PRDX2    | NM_005809    | peroxiredoxin 2                                                         | 100 | ✓ |       |
| PRIM2    | NM_000947    | primase, DNA, polypeptide 2                                             | 60  | ✓ |       |
| PRKCZ    | NM_002744    | protein kinase C, zeta                                                  | 70  | ✓ |       |

|         |              |                                                             |     |   |  |
|---------|--------------|-------------------------------------------------------------|-----|---|--|
| PRKD3   | NM_005813    | protein kinase D3                                           | 80  | ✓ |  |
| PROCR   | NM_006404    | protein C receptor                                          | 60  | ✓ |  |
| PROM1   | NM_006017    | prominin 1                                                  | 80  | ✓ |  |
| PROS1   | NM_000313    | protein S (alpha)                                           | 60  | ✓ |  |
| PRPF18  | NM_003675    | PRP18 pre-mRNA processing factor 18 homolog                 | 80  | ✓ |  |
| PSMA2   | NM_002787    | proteasome (prosome, macropain) subunit, alpha type, 2      | 80  | ✓ |  |
| PSMB3   | NM_002795    | proteasome (prosome, macropain) subunit, beta type, 3       | 80  | ✓ |  |
| PSMB5   | NM_002797    | proteasome (prosome, macropain) subunit, beta type, 5       | 80  | ✓ |  |
| PSMD1   | NM_002807    | proteasome (prosome, macropain) 26S subunit, non-ATPase, 1  | 80  | ✓ |  |
| PSMD11  | NM_002815    | proteasome (prosome, macropain) 26S subunit, non-ATPase, 11 | 100 | ✓ |  |
| PSMD12  | NM_174871    | proteasome (prosome, macropain) 26S subunit, non-ATPase, 12 | 100 | ✓ |  |
| PSMD13  | NM_002817    | proteasome (prosome, macropain) 26S subunit, non-ATPase, 13 | 60  | ✓ |  |
| PSMD3   | NM_002809    | proteasome (prosome, macropain) 26S subunit, non-ATPase, 3  | 80  | ✓ |  |
| PSMD4   | NM_002810    | proteasome (prosome, macropain) 26S subunit, non-ATPase, 4  | 67  | ✓ |  |
| PSMD6   | NM_014814    | proteasome (prosome, macropain) 26S subunit, non-ATPase, 6  | 60  | ✓ |  |
| PSMD7   | NM_002811    | proteasome (prosome, macropain) 26S subunit, non-ATPase, 7  | 100 | ✓ |  |
| PSME1   | NM_006263    | proteasome (prosome, macropain) activator subunit 1         | 60  | ✓ |  |
| PSME3   | NM_005789    | proteasome (prosome, macropain) activator subunit 3         | 80  | ✓ |  |
| PTCRA   | NM_138296    | pre T-cell antigen receptor alpha                           | 60  | ✓ |  |
| PTDSR   | NM_015167    | phosphatidylserine receptor                                 | 100 | ✓ |  |
| PTGFRN  | NM_020440    | prostaglandin F2 receptor negative regulator                | 80  | ✓ |  |
| PTPRM   | NM_002845    | protein tyrosine phosphatase, receptor type, M              | 60  | ✓ |  |
| PVALB   | NM_002854    | parvalbumin                                                 | 60  | ✓ |  |
| PVR     | NM_006505    | poliovirus receptor                                         | 100 | ✓ |  |
| PVRL1   | NM_002855    | poliovirus receptor-related 1                               | 100 | ✓ |  |
| PVRL2   | NM_002856    | poliovirus receptor-related 2                               | 100 | ✓ |  |
| PXDNL   | NM_144651    | peroxidasin homolog (Drosophila)-like                       | 100 | ✓ |  |
| PYCARD  | NM_013258    | PYD and CARD domain containing                              | 100 | ✓ |  |
| PYROXD1 | NM_024854    | pyridine nucleotide-disulphide oxidoreductase domain 1      | 80  | ✓ |  |
| QSOX1   | NM_001004128 | quiescin Q6 sulfhydryl oxidase 1                            | 100 | ✓ |  |
| QSOX2   | NM_181701    | quiescin Q6 sulfhydryl oxidase 2                            | 100 | ✓ |  |
| QTRT1   | NM_031209    | queuine tRNA-ribosyltransferase 1                           | 100 | ✓ |  |
| RAB33A  | NM_004794    | RAB33A, member RAS oncogene family                          | 100 | ✓ |  |
| RAB43   | NM_198490    | RAB43, member RAS oncogene family                           | 100 | ✓ |  |
| RAC1    | NM_006908    | ras-related C3 botulinum toxin substrate 1                  | 60  | ✓ |  |
| RAMP2   | NM_005854    | receptor (G protein-coupled) activity modifying protein 2   | 100 | ✓ |  |
| RAN     | NM_006325    | RAN, member RAS oncogene family                             | 60  | ✓ |  |
| RARRES1 | NM_002888    | retinoic acid receptor responder (tazarotene induced) 1     | 80  | ✓ |  |
| RARRES2 | NM_002889    | retinoic acid receptor responder (tazarotene induced) 2     | 80  | ✓ |  |
| RARRES3 | NM_004585    | retinoic acid receptor responder (tazarotene induced) 3     | 60  | ✓ |  |
| RASA2   | NM_006506    | RAS p21 protein activator 2                                 | 100 | ✓ |  |
| RASA4   | NM_006989    | RAS p21 protein activator 4                                 | 100 | ✓ |  |
| RBMX    | NM_002139    | RNA binding motif protein, X-linked                         | 100 | ✓ |  |
| RBMXL1  | NM_019610    | RNA binding motif protein, X-linked-like 1                  | 60  | ✓ |  |
| RBP1    | NM_002899    | retinol binding protein 1, cellular                         | 100 | ✓ |  |
| RBP2    | NM_004164    | retinol binding protein 2, cellular                         | 100 | ✓ |  |

|              |           |                                                      |     |   |  |
|--------------|-----------|------------------------------------------------------|-----|---|--|
| RBP5         | NM_031491 | retinol binding protein 5, cellular                  | 80  | ✓ |  |
| RDX          | NM_002906 | radixin                                              | 100 | ✓ |  |
| REEP4        | NM_025232 | receptor accessory protein 4                         | 67  | ✓ |  |
| REG1A        | NM_002909 | regenerating islet-derived 1 alpha                   | 60  | ✓ |  |
| RETSAT       | NM_017750 | retinol saturase (all-trans-retinol 13,14-reductase) | 100 | ✓ |  |
| RFC3         | NM_181558 | replication factor C (activator 1) 3                 | 80  | ✓ |  |
| RFESD        | NM_173362 | Rieske (Fe-S) domain containing                      | 100 | ✓ |  |
| RFFL         | NM_057178 | ring finger and FYVE-like domain containing 1        | 80  | ✓ |  |
| RHBDF1       | NM_022450 | rhomboid 5 homolog 1                                 | 60  | ✓ |  |
| RHBG         | NM_020407 | Rh family, B glycoprotein                            | 80  | ✓ |  |
| RHCE         | NM_020485 | Rh blood group, CcEe antigens                        | 100 | ✓ |  |
| RHCG         | NM_016321 | Rh family, C glycoprotein                            | 100 | ✓ |  |
| RHO          | NM_000539 | rhodopsin                                            | 60  | ✓ |  |
| RIMS3        | NM_014747 | regulating synaptic membrane exocytosis 3            | 60  | ✓ |  |
| RIN2         | NM_018993 | Ras and Rab interactor 2                             | 100 | ✓ |  |
| RIPK2        | NM_003821 | receptor-interacting serine-threonine kinase 2       | 60  | ✓ |  |
| RNF135       | NM_032322 | ring finger protein 135                              | 60  | ✓ |  |
| RNF144B      | NM_182757 | ring finger 144B                                     | 60  | ✓ |  |
| RNFT2        | NM_032814 | ring finger protein, transmembrane 2                 | 60  | ✓ |  |
| ROBO1        | NM_002941 | roundabout, axon guidance receptor, homolog 1        | 100 | ✓ |  |
| ROBO3        | NM_022370 | roundabout, axon guidance receptor, homolog 3        | 100 | ✓ |  |
| ROBO4        | NM_019055 | roundabout homolog 4, magic roundabout               | 100 | ✓ |  |
| ROD1         | NM_005156 | ROD1 regulator of differentiation 1                  | 100 | ✓ |  |
| ROPN1        | NM_017578 | ropporin, rhophilin associated protein 1             | 60  | ✓ |  |
| ROR2         | NM_004560 | receptor tyrosine kinase-like orphan receptor 2      | 80  | ✓ |  |
| RP11-45J16.2 | NM_138784 | flavin-containing monooxygenase pseudogene           | 100 | ✓ |  |
| RPL10A       | NM_007104 | ribosomal protein L10a                               | 60  | ✓ |  |
| RPL17        | NM_000985 | ribosomal protein L17                                | 60  | ✓ |  |
| RPL18        | NM_000979 | ribosomal protein L18                                | 80  | ✓ |  |
| RPL3         | NM_000967 | ribosomal protein L3                                 | 80  | ✓ |  |
| RPL31        | NM_000993 | ribosomal protein L31                                | 80  | ✓ |  |
| RPL37        | NM_000997 | ribosomal protein L37                                | 100 | ✓ |  |
| RPL4         | NM_000968 | ribosomal protein L4                                 | 60  | ✓ |  |
| RPL5         | NM_000969 | ribosomal protein L5                                 | 60  | ✓ |  |
| RPL6         | NM_000970 | ribosomal protein L6                                 | 100 | ✓ |  |
| RPL9         | NM_000661 | ribosomal protein L9                                 | 80  | ✓ |  |
| RPN1         | NM_002950 | ribophorin I                                         | 80  | ✓ |  |
| RPS18        | NM_022551 | ribosomal protein S18                                | 60  | ✓ |  |
| RPS6         | NM_001010 | ribosomal protein S6                                 | 60  | ✓ |  |
| RRAGD        | NM_021244 | Ras-related GTP binding D                            | 80  | ✓ |  |
| RTN4R        | NM_023004 | reticulon 4 receptor                                 | 100 | ✓ |  |
| RTN4RL1      | NM_178568 | reticulon 4 receptor-like 1                          | 100 | ✓ |  |
| RUVBL2       | NM_006666 | RuvB-like 2                                          | 80  | ✓ |  |
| RWDD3        | NM_015485 | RWD domain containing 3                              | 60  | ✓ |  |
| S100A14      | NM_020672 | S100 calcium binding protein A14                     | 60  | ✓ |  |
| SALL1        | NM_002968 | sal-like 1                                           | 60  | ✓ |  |

|         |           |                                                              |     |   |  |
|---------|-----------|--------------------------------------------------------------|-----|---|--|
| SASH3   | NM_018990 | SAM and SH3 domain containing 3                              | 100 | ✓ |  |
| SBNO1   | NM_018183 | strawberry notch homolog 1                                   | 60  | ✓ |  |
| SCARA3  | NM_016240 | scavenger receptor class A, member 3                         | 80  | ✓ |  |
| SCARF1  | NM_003693 | scavenger receptor class F, member 1                         | 100 | ✓ |  |
| SCYL1   | NM_020680 | SCY1-like 1                                                  | 60  | ✓ |  |
| SDC1    | NM_002997 | syndecan 1                                                   | 80  | ✓ |  |
| SEC13L1 | NM_030673 | SEC13-like 1                                                 | 100 | ✓ |  |
| SEC14L3 | NM_174975 | SEC14-like 3                                                 | 100 | ✓ |  |
| SEC22A  | NM_012430 | SEC22 vesicle trafficking protein homolog A                  | 100 | ✓ |  |
| SEC22C  | NM_004206 | SEC22 vesicle trafficking protein homolog C                  | 80  | ✓ |  |
| SEC23A  | NM_006364 | Sec23 homolog A                                              | 100 | ✓ |  |
| SEC23IP | NM_007190 | SEC23 interacting protein                                    | 100 | ✓ |  |
| SELL    | NM_000655 | selectin L                                                   | 100 | ✓ |  |
| SELPLG  | NM_003006 | selectin P ligand                                            | 80  | ✓ |  |
| SELS    | NM_018445 | selenoprotein S                                              | 100 | ✓ |  |
| SEMA3C  | NM_006379 | sema domain, 3C                                              | 100 | ✓ |  |
| SEMA3D  | NM_152754 | sema domain, 3D                                              | 100 | ✓ |  |
| SEMA4C  | NM_017789 | sema domain, 4C                                              | 100 | ✓ |  |
| SEMA4D  | NM_006378 | sema domain, 4D                                              | 100 | ✓ |  |
| SEMA5A  | NM_003966 | sema domain,5A                                               | 100 | ✓ |  |
| SEMA5B  | NM_018987 | sema domain, 5B                                              | 100 | ✓ |  |
| SEMA6B  | NM_020241 | sema domain, 6B                                              | 60  | ✓ |  |
| SEMA6D  | NM_020858 | sema domain, 6D                                              | 80  | ✓ |  |
| SENP5   | NM_152699 | SUMO1/sentrin specific peptidase 5                           | 100 | ✓ |  |
| SENP7   | NM_020654 | SUMO1/sentrin specific peptidase 7                           | 80  | ✓ |  |
| SEPT2   | NM_004404 | septin 2                                                     | 100 | ✓ |  |
| SEPT3   | NM_019106 | septin 3                                                     | 100 | ✓ |  |
| SERGEF  | NM_012139 | secretion regulating guanine nucleotide exchange factor      | 60  | ✓ |  |
| SET     | NM_003011 | SET translocation (myeloid leukemia-associated)              | 60  | ✓ |  |
| SEZ6L2  | NM_012410 | seizure related 6 homolog (mouse)-like 2                     | 100 | ✓ |  |
| SF3B3   | NM_012426 | splicing factor 3b, subunit 3                                | 60  | ✓ |  |
| SFRP1   | NM_003012 | secreted frizzled-related protein 1                          | 100 | ✓ |  |
| SFRS4   | NM_005626 | splicing factor, arginine/serine-rich 4                      | 60  | ✓ |  |
| SFTPA1  | NM_005411 | surfactant, pulmonary-associated protein A1                  | 100 | ✓ |  |
| SGCB    | NM_000232 | sarcoglycan, beta (43kDa dystrophin-associated glycoprotein) | 100 | ✓ |  |
| SH3BP5L | NM_030645 | SH3-binding domain protein 5-like                            | 60  | ✓ |  |
| SH3TC1  | NM_018986 | SH3 domain and tetratricopeptide repeats 1                   | 80  | ✓ |  |
| SHMT1   | NM_004169 | serine hydroxymethyltransferase 1 (soluble)                  | 60  | ✓ |  |
| SIAH1   | NM_003031 | seven in absentia homolog 1                                  | 60  | ✓ |  |
| SIGLEC5 | NM_003830 | sialic acid binding Ig-like lectin 5                         | 60  | ✓ |  |
| SIGLEC6 | NM_001245 | sialic acid binding Ig-like lectin 6                         | 80  | ✓ |  |
| SIGLEC7 | NM_014385 | sialic acid binding Ig-like lectin 7                         | 100 | ✓ |  |
| SIGLEC8 | NM_014442 | sialic acid binding Ig-like lectin 8                         | 100 | ✓ |  |
| SKAP1   | NM_003726 | src kinase associated phosphoprotein 1                       | 60  | ✓ |  |
| SLAMF9  | NM_033438 | SLAM family member 9                                         | 60  | ✓ |  |
| SLC22A3 | NM_021977 | solute carrier family 22                                     | 60  | ✓ |  |

|            |              |                                                                                                               |     |   |  |
|------------|--------------|---------------------------------------------------------------------------------------------------------------|-----|---|--|
| SLC35A1    | NM_006416    | solute carrier family 35                                                                                      | 60  | ✓ |  |
| SMC1A      | NM_006306    | structural maintenance of chromosomes 1A                                                                      | 100 | ✓ |  |
| SMC2       | NM_006444    | structural maintenance of chromosomes 2                                                                       | 100 | ✓ |  |
| SNAPIN     | NM_012437    | SNAP-associated protein                                                                                       | 100 | ✓ |  |
| SNED1      | XM_059482    | sushi, nidogen and EGF-like domains 1                                                                         | 80  | ✓ |  |
| SNRPA1     | NM_003090    | small nuclear ribonucleoprotein polypeptide A'                                                                | 100 | ✓ |  |
| SNRPB      | NM_198216    | small nuclear ribonucleoprotein polypeptides B and B1                                                         | 100 | ✓ |  |
| SNRPC      | NM_003093    | small nuclear ribonucleoprotein polypeptide C                                                                 | 100 | ✓ |  |
| SNRPD2     | NM_004597    | small nuclear ribonucleoprotein D2 polypeptide                                                                | 60  | ✓ |  |
| SNRPE      | NM_003094    | small nuclear ribonucleoprotein polypeptide E                                                                 | 100 | ✓ |  |
| SNX15      | NM_013306    | sorting nexin 15                                                                                              | 100 | ✓ |  |
| SNX2       | NM_003100    | sorting nexin 2                                                                                               | 100 | ✓ |  |
| SORCS2     | NM_020777    | sortilin-related VPS10 domain containing receptor 2                                                           | 100 | ✓ |  |
| SORCS3     | NM_014978    | sortilin-related VPS10 domain containing receptor 3                                                           | 100 | ✓ |  |
| SORL1      | NM_003105    | sortilin-related receptor, L(DLR class) A repeats-containing                                                  | 80  | ✓ |  |
| SOX30      | NM_007017    | SRY (sex determining region Y)-box 30                                                                         | 60  | ✓ |  |
| SPIN2      | NM_019003    | spindlin family, member 2                                                                                     | 100 | ✓ |  |
| SPINK1     | NM_003122    | serine peptidase inhibitor, Kazal type 1                                                                      | 100 | ✓ |  |
| SPINK4     | NM_014471    | serine peptidase inhibitor, Kazal type 4                                                                      | 100 | ✓ |  |
| SPNS1      | NM_032038    | spinster homolog 1                                                                                            | 100 | ✓ |  |
| SPRY3      | NM_005840    | sprouty homolog 3                                                                                             | 80  | ✓ |  |
| SRGAP3     | NM_014850    | SLIT-ROBO Rho GTPase activating protein 3                                                                     | 60  | ✓ |  |
| SRPR       | NM_003139    | signal recognition particle receptor                                                                          | 80  | ✓ |  |
| SRPRB      | NM_021203    | signal recognition particle receptor, B subunit                                                               | 100 | ✓ |  |
| SSR2       | NM_003145    | signal sequence receptor, beta (translocon-associated protein beta)                                           | 80  | ✓ |  |
| SSR3       | NM_007107    | signal sequence receptor, gamma (translocon-associated protein gamma)                                         | 100 | ✓ |  |
| ST13       | NM_003932    | suppression of tumorigenicity 13 (colon carcinoma) (Hsp70 interacting protein)                                | 80  | ✓ |  |
| ST6GALNAC6 | NM_013443    | ST6 (alpha-N-acetyl-neuraminyl-2,3-beta-galactosyl-1,3)-N-acetylgalactosaminide alpha-2,6-sialyltransferase 6 | 80  | ✓ |  |
| ST8SIA1    | NM_003034    | ST8 alpha-N-acetyl-neuraminide alpha-2,8-sialyltransferase 1                                                  | 67  | ✓ |  |
| ST8SIA2    | NM_006011    | ST8 alpha-N-acetyl-neuraminide alpha-2,8-sialyltransferase 2                                                  | 60  | ✓ |  |
| STAP1      | NM_012108    | signal transducing adaptor family member 1                                                                    | 100 | ✓ |  |
| STC2       | NM_003714    | stanniocalcin 2                                                                                               | 80  | ✓ |  |
| STEAP2     | NM_152999    | six transmembrane epithelial antigen of the prostate 2                                                        | 100 | ✓ |  |
| STEAP3     | NM_018234    | STEAP family member 3                                                                                         | 100 | ✓ |  |
| STEAP4     | NM_024636    | STEAP family member 4                                                                                         | 80  | ✓ |  |
| STIL       | NM_003035    | SCL/TAL1 interrupting locus                                                                                   | 60  | ✓ |  |
| STK16      | NM_003691    | serine/threonine kinase 16                                                                                    | 60  | ✓ |  |
| STON2      | NM_033104    | stonin 2                                                                                                      | 100 | ✓ |  |
| STRN4      | NM_013403    | striatin, calmodulin binding protein 4                                                                        | 60  | ✓ |  |
| STX11      | NM_003764    | syntaxin 11                                                                                                   | 100 | ✓ |  |
| STX12      | NM_177424    | syntaxin 12                                                                                                   | 80  | ✓ |  |
| STX19      | NM_001001850 | syntaxin 19                                                                                                   | 80  | ✓ |  |
| STX1A      | NM_004603    | syntaxin 1A                                                                                                   | 80  | ✓ |  |
| STX1B      | NM_052874    | syntaxin 1B                                                                                                   | 80  | ✓ |  |
| STX2       | NM_001980    | syntaxin 2                                                                                                    | 100 | ✓ |  |



|         |              |                                                                                                  |     |   |  |
|---------|--------------|--------------------------------------------------------------------------------------------------|-----|---|--|
| STX3    | NM_004177    | syntaxin 3                                                                                       | 100 | ✓ |  |
| STX4    | NM_004604    | syntaxin 4                                                                                       | 100 | ✓ |  |
| STX6    | NM_005819    | syntaxin 6                                                                                       | 80  | ✓ |  |
| STX7    | NM_003569    | syntaxin 7                                                                                       | 80  | ✓ |  |
| STX8    | NM_004853    | syntaxin 8                                                                                       | 100 | ✓ |  |
| STXBP2  | NM_006949    | syntaxin binding protein 2                                                                       | 100 | ✓ |  |
| SUPV3L1 | NM_003171    | suppressor of var1, 3-like 1                                                                     | 60  | ✓ |  |
| SURF1   | NM_003172    | surfeit 1                                                                                        | 80  | ✓ |  |
| SV2A    | NM_014849    | synaptic vesicle glycoprotein 2A                                                                 | 100 | ✓ |  |
| SYNE2   | NM_015180    | spectrin repeat containing, nuclear envelope 2                                                   | 100 | ✓ |  |
| SYTL2   | NM_032379    | synaptotagmin-like 2                                                                             | 100 | ✓ |  |
| TAPBPL  | NM_018009    | TAP binding protein-like                                                                         | 80  | ✓ |  |
| TAS2R38 | NM_176817    | taste receptor, type 2, member 38                                                                | 100 | ✓ |  |
| TAS2R42 | NM_181429    | taste receptor, type 2, member 42                                                                | 100 | ✓ |  |
| TAS2R49 | NM_176889    | taste receptor, type 2, member 49                                                                | 100 | ✓ |  |
| TAS2R50 | NM_176890    | taste receptor, type 2, member 50                                                                | 100 | ✓ |  |
| TBC1D16 | NM_019020    | TBC1 domain family, member 16                                                                    | 100 | ✓ |  |
| TCEA3   | XM_114075    | transcription elongation factor A (SII), 3                                                       | 60  | ✓ |  |
| TDGF1   | NM_003212    | teratocarcinoma-derived growth factor 1                                                          | 80  | ✓ |  |
| TDO2    | NM_005651    | tryptophan 2,3-dioxygenase                                                                       | 100 | ✓ |  |
| TEX101  | NM_031451    | testis expressed 101                                                                             | 100 | ✓ |  |
| TEX14   | NM_031272    | testis expressed 14                                                                              | 60  | ✓ |  |
| TFR2    | NM_003227    | transferrin receptor 2                                                                           | 100 | ✓ |  |
| TGFBI   | NM_000358    | transforming growth factor, beta-induced                                                         | 100 | ✓ |  |
| TGM1    | NM_000359    | transglutaminase 1 (K polypeptide epidermal type I, protein-glutamine-gamma-glutamyltransferase) | 60  | ✓ |  |
| TGM6    | NM_198994    | transglutaminase 6                                                                               | 80  | ✓ |  |
| THADA   | NM_022065    | thyroid adenoma associated                                                                       | 100 | ✓ |  |
| THPO    | NM_000460    | thrombopoietin                                                                                   | 100 | ✓ |  |
| TIMM50  | NM_001001563 | translocase of inner mitochondrial membrane 50 homolog                                           | 80  | ✓ |  |
| TIMM8A  | NM_004085    | translocase of inner mitochondrial membrane 8 homolog A                                          | 80  | ✓ |  |
| TIPARP  | NM_015508    | TCDD-inducible poly(ADP-ribose) polymerase                                                       | 60  | ✓ |  |
| TLR10   | NM_030956    | toll-like receptor 10                                                                            | 83  | ✓ |  |
| TLR3    | NM_003265    | toll-like receptor 3                                                                             | 60  | ✓ |  |
| TLR4    | NM_003266    | toll-like receptor 4                                                                             | 80  | ✓ |  |
| TLR9    | NM_017442    | toll-like receptor 9                                                                             | 100 | ✓ |  |
| TM7SF2  | NM_003273    | transmembrane 7 superfamily member 2                                                             | 100 | ✓ |  |
| TM9SF1  | NM_006405    | transmembrane 9 superfamily member 1                                                             | 80  | ✓ |  |
| TM9SF4  | NM_014742    | transmembrane 9 superfamily protein member 4                                                     | 100 | ✓ |  |
| TMCO1   | NM_019026    | transmembrane and coiled-coil domains 1                                                          | 80  | ✓ |  |
| TMED1   | NM_006858    | transmembrane emp24 protein transport domain containing 1                                        | 100 | ✓ |  |
| TMED2   | NM_006815    | transmembrane emp24 domain trafficking protein 2                                                 | 100 | ✓ |  |
| TMED3   | NM_007364    | transmembrane emp24 protein transport domain containing 3                                        | 100 | ✓ |  |
| TMED5   | NM_016040    | transmembrane emp24 protein transport domain containing 5                                        | 100 | ✓ |  |
| TMED6   | NM_144676    | transmembrane emp24 protein transport domain containing 6                                        | 100 | ✓ |  |
| TMED7   | NM_181836    | transmembrane emp24 protein transport domain containing 7                                        | 100 | ✓ |  |
| TMED8   | NM_213601    | transmembrane emp24 protein transport domain containing 8                                        | 100 | ✓ |  |

|          |              |                                                              |     |   |       |
|----------|--------------|--------------------------------------------------------------|-----|---|-------|
| TMEM1    | NM_001001723 | transmembrane protein 1                                      | 100 | ✓ |       |
| TMEM48   | NM_018087    | transmembrane protein 48                                     | 80  | ✓ |       |
| TMEM9    | NM_016456    | transmembrane protein 9                                      | 60  | ✓ |       |
| TNFAIP3  | NM_006290    | tumor necrosis factor, alpha-induced protein 3               | 100 | ✓ |       |
| TNFRSF18 | NM_004195    | tumor necrosis factor receptor superfamily, member 18        | 60  | ✓ |       |
| TNFRSF1A | NM_001065    | tumor necrosis factor receptor superfamily, member 1A        | 100 | ✓ |       |
| TNFRSF21 | NM_014452    | tumor necrosis factor receptor superfamily, member 21        | 100 | ✓ |       |
| TNFRSF25 | NM_003790    | tumor necrosis factor receptor superfamily, member 25        | 60  | ✓ |       |
| TNFRSF6B | NM_003823    | tumor necrosis factor receptor superfamily, member 6b, decoy | 100 | ✓ |       |
| TNFSF12  | NM_153012    | tumor necrosis factor (ligand) superfamily, member 12        | 100 | ✓ |       |
| TNFSF13B | NM_006573    | tumor necrosis factor (ligand) superfamily, member 13b       | 100 | ✓ |       |
| TNFSF14  | NM_003807    | tumor necrosis factor (ligand) superfamily, member 14        | 100 | ✓ |       |
| TNFSF15  | NM_005118    | tumor necrosis factor (ligand) superfamily, member 15        | 100 | ✓ |       |
| TNFSF4   | NM_003326    | tumor necrosis factor (ligand) superfamily, member 4         | 100 | ✓ |       |
| TNFSF8   | NM_001244    | tumor necrosis factor (ligand) superfamily, member 8         | 100 | ✓ |       |
| TNXB     | NM_019105    | tenascin XB                                                  | 100 | ✓ |       |
| TOLLIP   | NM_019009    | toll interacting protein                                     | 100 | ✓ |       |
| TOM1L2   | NM_144678    | target of myb1-like 2                                        | 80  | ✓ |       |
| TOMM22   | NM_020243    | translocase of outer mitochondrial membrane 22 homolog       | 100 | ✓ |       |
| TP53BP2  | NM_005426    | tumor protein p53 binding protein, 2                         | 100 | ✓ |       |
| TPI1     | NM_000365    | triosephosphate isomerase 1                                  | 80  | ✓ |       |
| TPM1     | NM_000366    | tropomyosin 1 (alpha)                                        | 80  | ✓ |       |
| TPM2     | NM_213674    | tropomyosin 2 (beta)                                         | 100 | ✓ |       |
| TPR      | NM_003292    | translocated promoter region (to activated MET oncogene)     | 100 | ✓ |       |
| TPRKB    | NM_016058    | TP53RK binding protein                                       | 100 | ✓ |       |
| TRAF1    | NM_005658    | TNF receptor-associated factor 1                             | 100 | ✓ |       |
| TRAF3IP1 | NM_015650    | TNF receptor-associated factor 3 interacting protein 1       | 100 | ✓ |       |
| TRAM1    | NM_014294    | translocation associated membrane protein 1                  | 100 | ✓ |       |
| TRAPPC1  | NM_021210    | trafficking protein particle complex 1                       | 100 | ✓ |       |
| TRAPPC2L | NM_016209    | trafficking protein particle complex 2-like                  | 80  | ✓ |       |
| TRAT1    | NM_016388    | T cell receptor associated transmembrane adaptor 1           | 100 | ✓ |       |
| TREML2   | NM_024807    | triggering receptor expressed on myeloid cells-like 2        | 100 | ✓ |       |
| TREML4   | NM_198153    | triggering receptor expressed on myeloid cells-like 4        | 100 | ✓ |       |
| TRIB1    | NM_025195    | tribbles homolog 1                                           | 60  | ✓ |       |
| TRIB3    | NM_021158    | tribbles homolog 3                                           | 50  |   | 0.001 |
| TRIM14   | NM_014788    | tripartite motif-containing 14                               | 80  | ✓ |       |
| TRIM59   | NM_173084    | tripartite motif-containing 59                               | 100 | ✓ |       |
| TRIP10   | NM_004240    | thyroid hormone receptor interactor 10                       | 100 | ✓ |       |
| TROAP    | NM_005480    | trophinin associated protein (tastin)                        | 100 | ✓ |       |
| TSEN34   | NM_024075    | tRNA splicing endonuclease 34 homolog                        | 80  | ✓ |       |
| TSPO     | NM_000714    | translocator protein                                         | 100 | ✓ |       |
| TSTA3    | NM_003313    | tissue specific transplantation antigen P35B                 | 80  | ✓ |       |
| TTR      | NM_000371    | transthyretin                                                | 100 | ✓ |       |
| TUBA1C   | NM_032704    | tubulin, alpha 1c                                            | 60  | ✓ |       |
| TUBA3C   | NM_006001    | tubulin, alpha 3c                                            | 100 | ✓ |       |
| TUBA4A   | NM_006000    | tubulin, alpha 4a                                            | 60  | ✓ |       |

|          |           |                                                                   |     |   |  |
|----------|-----------|-------------------------------------------------------------------|-----|---|--|
| TUBG1    | NM_001070 | tubulin, gamma 1                                                  | 80  | ✓ |  |
| TXN      | NM_003329 | thioredoxin                                                       | 100 | ✓ |  |
| TXN2     | NM_012473 | thioredoxin 2                                                     | 80  | ✓ |  |
| TXNDC12  | NM_015913 | thioredoxin domain containing 12                                  | 100 | ✓ |  |
| TXNDC13  | NM_021156 | thioredoxin domain containing 13                                  | 100 | ✓ |  |
| TXNDC14  | NM_015959 | thioredoxin domain containing 14                                  | 100 | ✓ |  |
| TXNDC15  | NM_024715 | thioredoxin domain containing 15                                  | 100 | ✓ |  |
| TXNDC17  | NM_032731 | thioredoxin domain containing 17                                  | 100 | ✓ |  |
| TXNDC3   | NM_016616 | thioredoxin domain containing 3                                   | 100 | ✓ |  |
| TXNDC4   | XM_376898 | thioredoxin domain containing 4                                   | 80  | ✓ |  |
| TXNDC5   | NM_022085 | thioredoxin domain containing 5                                   | 100 | ✓ |  |
| TXNDC6   | NM_178130 | thioredoxin domain containing 6                                   | 100 | ✓ |  |
| TXNDC9   | NM_005783 | thioredoxin domain containing 9                                   | 100 | ✓ |  |
| TXNL1    | NM_004786 | thioredoxin-like 1                                                | 60  | ✓ |  |
| TXNL4A   | NM_006701 | thioredoxin-like 4A                                               | 80  | ✓ |  |
| TYMP     | NM_001953 | thymidine phosphorylase                                           | 100 | ✓ |  |
| U2AF1    | NM_006758 | U2 small nuclear RNA auxiliary factor 1                           | 60  | ✓ |  |
| U2AF2    | NM_007279 | U2 small nuclear RNA auxiliary factor 2                           | 80  | ✓ |  |
| UAP1     | NM_003115 | UDP-N-acetylglucosamine pyrophosphorylase 1                       | 100 | ✓ |  |
| UBE3C    | NM_014671 | ubiquitin protein ligase E3C                                      | 60  | ✓ |  |
| UCP1     | NM_021833 | uncoupling protein 1                                              | 100 | ✓ |  |
| UCP2     | NM_003355 | uncoupling protein 2                                              | 100 | ✓ |  |
| UCP3     | NM_003356 | uncoupling protein 3                                              | 80  | ✓ |  |
| UHRF1BP1 | NM_017754 | UHRF1 (ICBP90) binding protein 1                                  | 100 | ✓ |  |
| UIMC1    | NM_016290 | ubiquitin interaction motif containing 1                          | 100 | ✓ |  |
| ULBP1    | NM_025218 | UL16 binding protein 1                                            | 100 | ✓ |  |
| UNC5D    | NM_080872 | unc-5 homolog D                                                   | 100 | ✓ |  |
| UNK      | XM_290331 | Unknown                                                           | 80  | ✓ |  |
| UNK      | XM_373028 | Unknown                                                           | 80  | ✓ |  |
| UNK      | XM_377512 | Unknown                                                           | 60  | ✓ |  |
| UQCRQ    | NM_014402 | ubiquinol-cytochrome c reductase, complex III subunit VII, 9.5kDa | 80  | ✓ |  |
| USO1     | NM_003715 | USO1 homolog, vesicle docking protein                             | 100 | ✓ |  |
| USP34    | NM_014709 | ubiquitin specific peptidase 34                                   | 100 | ✓ |  |
| VAMP7    | NM_005638 | vesicle-associated membrane protein 7                             | 100 | ✓ |  |
| VIL2     | NM_003379 | villin 2                                                          | 80  | ✓ |  |
| VPS26A   | NM_004896 | vacuolar protein sorting 26 homolog A                             | 80  | ✓ |  |
| VPS26B   | NM_052875 | vacuolar protein sorting 26 homolog B                             | 80  | ✓ |  |
| VPS28    | NM_016208 | vacuolar protein sorting 28 homolog                               | 60  | ✓ |  |
| VTA1     | NM_016485 | Vps20-associated 1 homolog                                        | 60  | ✓ |  |
| WDR44    | NM_019045 | WD repeat domain 44                                               | 80  | ✓ |  |
| WDR54    | NM_032118 | WD repeat domain 54                                               | 100 | ✓ |  |
| WDR86    | NM_198285 | WD repeat domain 86                                               | 80  | ✓ |  |
| WDR88    | NM_173479 | WD repeat domain 88                                               | 100 | ✓ |  |
| WNT5A    | NM_003392 | wingless-type MMTV integration site family, member 5A             | 60  | ✓ |  |
| WNT6     | NM_006522 | wingless-type MMTV integration site family, member 6              | 60  | ✓ |  |
| WNT7A    | NM_004625 | wingless-type MMTV integration site family, member 7A             | 80  | ✓ |  |

|         |           |                                                                                             |     |   |  |
|---------|-----------|---------------------------------------------------------------------------------------------|-----|---|--|
| WNT7B   | NM_058238 | wingless-type MMTV integration site family, member 7B                                       | 100 | ✓ |  |
| WNT8B   | NM_003393 | wingless-type MMTV integration site family, member 8B                                       | 100 | ✓ |  |
| WSB2    | NM_018639 | WD repeat and SOCS box-containing 2                                                         | 100 | ✓ |  |
| XKR6    | NM_173683 | XK, Kell blood group complex subunit-related family, member 6                               | 100 | ✓ |  |
| XPOT    | NM_007235 | exportin, tRNA (nuclear export receptor for tRNAs)                                          | 60  | ✓ |  |
| YWHAE   | NM_006761 | tyrosine 3-monooxygenase/tryptophan 5-monooxygenase activation protein, epsilon polypeptide | 60  | ✓ |  |
| ZBED1   | NM_004729 | zinc finger, BED-type containing 1                                                          | 100 | ✓ |  |
| ZCCHC17 | NM_016505 | zinc finger, CCHC domain containing 17                                                      | 80  | ✓ |  |
| ZEB1    | NM_030751 | zinc finger E-box binding homeobox 1                                                        | 60  | ✓ |  |
| ZIC2    | NM_007129 | Zic family member 2                                                                         | 100 | ✓ |  |
| ZNF342  | NM_145288 | zinc finger protein 342                                                                     | 60  | ✓ |  |
| ZNF626  | NM_145297 | zinc finger protein 626                                                                     | 60  | ✓ |  |
| ZP2     | NM_003460 | zona pellucida glycoprotein 2                                                               | 100 | ✓ |  |
| ZP3     | NM_007155 | zona pellucida glycoprotein 3                                                               | 80  | ✓ |  |
| ZWILCH  | NM_017975 | Zwilch, kinetochore associated, homolog                                                     | 80  | ✓ |  |
