# Supplementary material
Source: PubMed Central journal article supplement (PMC3619155)
Supplement: Supp_Table6.pdf [file Supp_Table6.pdf]

**Supplementary Table S6.** List of the 6 nominated rescuer gene candidates

| Gene     | RefSeq ID | Description                                          | H score | Qualified by H score | p-value |
|----------|-----------|------------------------------------------------------|---------|----------------------|---------|
| ASB5     | NM_080874 | ankyrin repeat and SOCS box containing 5             | 60      | ✓                    |         |
| CROCC    | NM_014675 | ciliary rootlet coiled-coil, rootletin               | 75      | ✓                    |         |
| FLJ35894 | NM_173616 | coiled-coil domain containing 79                     | 60      | ✓                    |         |
| PMAIP1   | NM_021127 | phorbol-12-myristate-13-acetate-induced protein 1    | 60      | ✓                    |         |
| SH3BGRL2 | NM_031469 | SH3 domain binding glutamic acid-rich protein like 2 | 60      | ✓                    |         |
| WDR74    | NM_018093 | WD repeat domain 74                                  | 60      | ✓                    |         |
