# Supplementary material
Source: PubMed Central journal article supplement (PMC3619155)
Supplement: Supp_Table7.pdf [file Supp_Table7.pdf]

**Supplementary Table S7.** 33 miRNAs associate with 91 essential gene HC\_OTEs and 2 rescuer gene HC\_OTEs

| Class     | miRbase ID   | mature miRNA    | miRNA sequence              | Experimentally validated targets |                                                                                                                                                                                                                                                                                                                                                                                                                                                                                                                                                                                                                                                                                                                               | Gene silenced in screen                    |
|-----------|--------------|-----------------|-----------------------------|----------------------------------|-------------------------------------------------------------------------------------------------------------------------------------------------------------------------------------------------------------------------------------------------------------------------------------------------------------------------------------------------------------------------------------------------------------------------------------------------------------------------------------------------------------------------------------------------------------------------------------------------------------------------------------------------------------------------------------------------------------------------------|--------------------------------------------|
| Essential | MIMAT0004814 | hsa-miR-654-3p  | UAUGUCUGCUGACCAUCA<br>CCUU  | 1                                | CDKN1A                                                                                                                                                                                                                                                                                                                                                                                                                                                                                                                                                                                                                                                                                                                        | 4 CDC34, RAMP3, IL4,<br>SEMA6D             |
| Essential | MIMAT0004487 | hsa-let-7f-2-3p | CUAUACAGUCUACUGUCU<br>UUCC  | 21                               | ASS1, CCND1, CDKN1A, CSN1, CSN6, CSN8, EEF1A2, ESM1,<br>FDPS, IL-13, KIF1A, KLK10, KLK6, MYC, NIS, NTS, PRDM1, TFF1,<br>TG, TITF1, VIM                                                                                                                                                                                                                                                                                                                                                                                                                                                                                                                                                                                        | 4 LILRA2, IGSF10, IL1RAP,<br>OR2T27        |
| Essential | MIMAT0000275 | hsa-miR-218-5p  | UUGUGCUUGAUCUAACCA<br>UGU   | 63                               | AC026713.5, ACTN1, AGPAT5, AHI1, AKAP8, ATP6V0E, BIRC6,<br>BLCAP, BTBD7, BTF3L4, C13ORF7, C5ORF5, CAMTA1, CDKN1B,<br>CENPO, CNTNAP2, COL1A1, COL4A1, DUSP18, EBP, EFNA1,<br>EFNB2, ETS2, FOXN2, GLCE, GPM6A, HECTD2, IKBKB, KATNAL1,<br>KIAA0391, KIAA1462, KLF9, KLHL13, LAMB3, LASP1, MAFG,<br>MBNL2, MRPS27, NACC1, NFE2L1, NUP93, OLIG2, PHC3, POGK,<br>POZ, PTPN11, PUM2, RARA, RHBDD1, RIT1, RNF38, SERINC3,<br>SFRS12, SLC11A2, SLC38A1, SP1, SSH1, STAM2, THOC2, TNIP2,<br>TPD52, TTC33, VOPP1                                                                                                                                                                                                                        | 5 SOX30, IL12RB2, IL18BP,<br>MYO18A, CDK10 |
| Essential | MIMAT0000437 | hsa-miR-145     | GUCCAGUUUCCCCAGGAA<br>UCCCU | 88                               | ACBD3, AKR1B10, ALDH3A1, ALPPL2, AP1G1, APH1A, ARL6IP5,<br>BNIP3, C11ORF58, C11ORF65, C3ORF34, C6ORF115, CFBF,<br>CCDC25, CCDC43, CCNA2, CDKN1A, CIQTNF5, CLINT1, DDR1,<br>DFFA, DTD1, ELK-1, ERLINI, F11R, FAM108C1, FAM3C, FAM45A,<br>FAM79B, FBXO28, FLI1, FLJ21308, FSCN1, GMFB, GOLPH2, HLTF,<br>HOXA9, IFNB1, IGF1R, IGF-IR, IRS1, IRS-1, JAM-A, KLF4, KLF5,<br>KREMEN1, KRT7, LOC203547, LOC340888, LOC342705,<br>LOC400011, LYPLA2, MAP2K6, MEST, MIXL1, MMP1, MMP14,<br>MTMR14, MUC1, MYC, MYO6, NDRG2, NDUFA4, NHEDCI,<br>NIPSNAP1, OCT4, PARP8, PHF17, PIGF, PODXL, POU5F1,<br>PPP3CA, PTP4A2, RASA1, ROBO2, RTKN, SOCS7, SERINC5,<br>SOX2, STAT1, SWAP70, TIRAP, TMEM9BMMP12, TMOD3, TPM3,<br>TSPAN6, USP46, YES1 | 5 RAB13, KISS1, LCP1,<br>ENC1, KDELR1      |
| Essential | MIMAT0003320 | hsa-miR-650     | AGGAGGCA GCGCUCUCAG<br>GAC  | 1                                | ING4                                                                                                                                                                                                                                                                                                                                                                                                                                                                                                                                                                                                                                                                                                                          | 2 LYRM1, DSCAM                             |
| Essential | MIMAT0017989 | hsa-miR-3612    | AGGAGGCAUCUUGAGAAA<br>UGGA  | -                                | Unknown                                                                                                                                                                                                                                                                                                                                                                                                                                                                                                                                                                                                                                                                                                                       | 2 LYRM1, DSCAM                             |
| Essential | MIMAT0004987 | hsa-miR-944     | AAAUUAUUGUACAUCGGA<br>UGAG  | -                                | Unknown                                                                                                                                                                                                                                                                                                                                                                                                                                                                                                                                                                                                                                                                                                                       | 3 DHX38, CYP2E1, OSMR                      |
| Essential | MIMAT0019972 | hsa-miR-4797-5p | GACAGAGUGCCACUJACU<br>GAA   | -                                | Unknown                                                                                                                                                                                                                                                                                                                                                                                                                                                                                                                                                                                                                                                                                                                       | 3 LILRA4, CCDC76, LILRP2                   |
| Essential | MIMAT0019928 | hsa-miR-4773    | CAGAACAGGAGCAUAGAA<br>AGGC  | -                                | Unknown                                                                                                                                                                                                                                                                                                                                                                                                                                                                                                                                                                                                                                                                                                                       | 4 ARHGEF1, MS4A1,<br>NEURL, PROM1          |
| Essential | MIMAT0019938 | hsa-miR-4779    | UAGGAGGGAUAGUAAAA<br>GCAG   | -                                | Unknown                                                                                                                                                                                                                                                                                                                                                                                                                                                                                                                                                                                                                                                                                                                       | 3 CDC34, CYP2F1, NDUFB2                    |
| Essential | MIMAT0004903 | hsa-miR-300     | UAUACAAGGGCAGACUCU<br>CUCU  | -                                | Unknown                                                                                                                                                                                                                                                                                                                                                                                                                                                                                                                                                                                                                                                                                                                       | 3 UBOX5, INHA, CYP2R1                      |

|           |              |                      |                                 |   |         |   |                                                         |
|-----------|--------------|----------------------|---------------------------------|---|---------|---|---------------------------------------------------------|
| Essential | MIMAT0000736 | hsa-miR-381          | UAUACAAGGGCAAGCUCU<br>CUGU      | - | Unknown | 3 | UBOX5, INHA, CYP2R1                                     |
| Essential | MIMAT0019850 | hsa-miR-4728-3p      | CAUGCUGACCUCUCCUCCU<br>GCCCCAG  | - | Unknown | 4 | HYLS1, NGF, PNRC1,<br>RARRES1                           |
| Essential | MIMAT0015378 | hsa-miR-3065-3p      | UCAGCACCAGGAUUAUUGU<br>UGGAG    | - | Unknown | 3 | IFITM1, TUBA4A, CTHRC1                                  |
| Essential | MIMAT0007892 | hsa-miR-1915         | CCCAGGGCGACGCGGGCG<br>GG        | - | Unknown | 2 | KISS1, DERL1                                            |
| Essential | MIMAT0005920 | hsa-miR-1266         | CCUCAGGGCUGUAGAACA<br>GGGCU     | - | Unknown | 2 | CYBB, IL1R2                                             |
| Essential | MIMAT0019055 | hsa-miR-4518         | GCUCAGGGAUGAUAAACUG<br>UGCUGAGA | - | Unknown | 2 | CYBB, IL1R2                                             |
| Essential | MIMAT0016851 | hsa-miR-4299         | GCUGGUGACAUGAGAGGC              | - | Unknown | 4 | OLR1, ABCB8, MS4A3,<br>VPS26A                           |
| Essential | MIMAT0003292 | hsa-miR-623          | AUCCCUUGCAGGGGCGUGU<br>UGGGU    | - | Unknown | 3 | CD2BP2, FCRLA, RBP5                                     |
| Essential | MIMAT0018114 | hsa-miR-3686         | AUCUGUAAAGAGAAAGUAAA<br>UGA     | - | Unknown | 7 | CD300LF, DOCK5, EIF4B,<br>ARL9, KLHL2, OR10X1,<br>SORL1 |
| Essential | MIMAT0005458 | hsa-miR-1224-5p      | GUGAGGACUCGGGAGGUG<br>G         | - | Unknown | 4 | PRSS12, DNAJC16,<br>CDCA4, OR13A1                       |
| Essential | MIMAT0019903 | hsa-miR-4758-5p      | GUGAGUGGGAGCCGGUG<br>GGGCUG     | - | Unknown | 2 | ANTXR1, EIF4A3                                          |
| Essential | MIMAT0019798 | hsa-miR-4701-5p      | UUGGCCACCACACCUACC<br>CCUU      | - | Unknown | 2 | FGF22, TXN2                                             |
| Essential | MIMAT0003255 | hsa-miR-588          | UUGGCCACAAUGGGUUG<br>AAC        | - | Unknown | 2 | FGF22, TXN2                                             |
| Essential | MIMAT0004589 | hsa-miR-30b-3p       | CUGGGAGGUGGAUGUUUA<br>CUUC      | - | Unknown | 3 | CD300C, LSAMP, PSMD3                                    |
| Essential | MIMAT0018118 | hsa-miR-3689a-<br>3p | CUGGGAGGUGUGAUUUCG<br>UGGU      | - | Unknown | 3 | CD300C, LSAMP, PSMD3                                    |
| Essential | MIMAT0018181 | hsa-miR-3689b-<br>3p | CUGGGAGGUGUGAUUUG<br>UGGU       | - | Unknown | 3 | CD300C, LSAMP, PSMD3                                    |
| Essential | MIMAT0019007 | hsa-miR-3689c        | CUGGGAGGUGUGAUUUG<br>UGGU       | - | Unknown | 3 | CD300C, LSAMP, PSMD3                                    |
| Essential | MIMAT0003328 | hsa-miR-653          | GUGUUGAAACAAUCUCUA<br>CUG       | - | Unknown | 7 | HS3ST3B1, XAB2, ACYP1,<br>GDF2, GFOD2, LENG8,<br>OR51D1 |
| Essential | MIMAT0003164 | hsa-mir-544a         | AUUCUGCAUUUUUAGCAA<br>GUUC      | - | Unknown | 7 | TGS1, DYNLT1, FKBP3,<br>C19ORF61, IFT57, PDE5A,<br>PNN  |
| Essential | MIMAT0003243 | hsa-miR-578          | CUUCUUGUGCUCUAGGAU<br>UGU       | - | Unknown | 5 | PAFAH1B1, TNFRSF25,<br>ANKH, CYP11A1, VPS26B            |
| Rescuer   | MIMAT0014983 | hsa-miR-3121-3p      | UAAAUAGAGUAGGCAAAG<br>GACA      | - | Unknown | 1 | FETUB                                                   |

|         |              |              |                              |   |         |   |       |
|---------|--------------|--------------|------------------------------|---|---------|---|-------|
| Rescuer | MIMAT0019361 | hsa-miR-3976 | UAUAGAGAGCAGGAAGAU<br>UAAUGU | - | Unknown | 1 | FETUB |
|---------|--------------|--------------|------------------------------|---|---------|---|-------|
