# Supplementary material
Source: PubMed Central journal article supplement (PMC3619155)
Supplement: Supp_Table8.pdf [file Supp_Table8.pdf]

**Supplementary Table S8.** Overlap analysis with the Colombi essential gene sets reveal 71 genes in common

| Human essential genes (This study) | Human entrez ID | Mouse Ortholog | Mouse entrez ID | Essential genes (Colombi <i>et al.</i> ) |
|------------------------------------|-----------------|----------------|-----------------|------------------------------------------|
| AGER                               | 177             | Ager           | 11596           | ✓                                        |
| AP3M1                              | 26985           | Ap3m1          | 55946           | ✓                                        |
| AP3M2                              | 10947           | Ap3m2          | 64933           | ✓                                        |
| BID                                | 637             | Bid            | 12122           | ✓                                        |
| CDK10                              | 8558            | Cdk10          | 234854          | ✓                                        |
| CHRND                              | 1144            | Chrnd          | 11447           | ✓                                        |
| COL1A1                             | 1277            | Col1a1         | 12842           | ✓                                        |
| COPB2                              | 9276            | Copb2          | 50797           | ✓                                        |
| COPE                               | 11316           | Cope           | 59042           | ✓                                        |
| CYB561                             | 1534            | Cyb561         | 13056           | ✓                                        |
| CYBB                               | 1536            | Cybb           | 13058           | ✓                                        |
| CYP2E1                             | 1571            | Cyp2e1         | 13106           | ✓                                        |
| DUSP21                             | 63904           | 1700094E07Rik  | 73547           | ✓                                        |
| DYNLL1                             | 8655            | Dynll1         | 56455           | ✓                                        |
| EIF3G                              | 8666            | Eif3s4         | 53356           | ✓                                        |
| EIF4A3                             | 9775            | Ddx48          | 192170          | ✓                                        |
| FCRLA                              | 84824           | Fcrla          | 98752           | ✓                                        |
| FLRT2                              | 23768           | Flrt2          | 399558          | ✓                                        |
| GABARAPL1                          | 23710           | Gabarapl1      | 57436           | ✓                                        |
| GRB14                              | 2888            | Grb14          | 50915           | ✓                                        |
| HEY2                               | 23493           | Hey2           | 15214           | ✓                                        |
| HFE                                | 3077            | Hfe            | 15216           | ✓                                        |
| IGFBP2                             | 3485            | Igfbp2         | 16008           | ✓                                        |
| IL4I1                              | 259307          | Il4i1          | 14204           | ✓                                        |
| KPNA4                              | 3840            | Kpna4          | 16649           | ✓                                        |
| KRR1                               | 11103           | Krr1           | 52705           | ✓                                        |
| LAIR1                              | 3903            | Lair1          | 52855           | ✓                                        |
| LGALS1                             | 3956            | Lgals1         | 16852           | ✓                                        |
| LMBR1L                             | 55716           | Lmbr1l         | 74775           | ✓                                        |
| LOC399942                          | 10376           | Tuba2          | 22143           | ✓                                        |
| LRCH4                              | 4034            | Lrch4          | 231798          | ✓                                        |
| LSM3                               | 27258           | Lsm3           | 67678           | ✓                                        |
| LSM5                               | 23658           | Lsm5           | 66373           | ✓                                        |
| LY6H                               | 4062            | Ly6h           | 23934           | ✓                                        |
| MCM6                               | 4175            | Mcm6           | 17219           | ✓                                        |
| ME1                                | 4199            | Mod1           | 17436           | ✓                                        |
| MS4A3                              | 932             | Ms4a3          | 170813          | ✓                                        |
| NRXN3                              | 9369            | Nrxn3          | 18191           | ✓                                        |
| NUP93                              | 9688            | Nup93          | 71805           | ✓                                        |
| PCLO                               | 27445           | Pclo           | 26875           | ✓                                        |
| PCSK7                              | 9159            | Pcsk7          | 18554           | ✓                                        |
| PHB2                               | 11331           | Phb2           | 12034           | ✓                                        |
| POLR2A                             | 5430            | Polr2a         | 20020           | ✓                                        |
| PSMB3                              | 5691            | Psmb3          | 26446           | ✓                                        |
| PSMD7                              | 5713            | Psm7           | 17463           | ✓                                        |
| QTRT1                              | 81890           | Qtrt1          | 60507           | ✓                                        |
| RAN                                | 5901            | Ran            | 19384           | ✓                                        |
| RIPK2                              | 8767            | Ripk2          | 192656          | ✓                                        |
| ROR2                               | 4920            | Ror2           | 26564           | ✓                                        |
| RPL10A                             | 4736            | Rpl10a         | 19896           | ✓                                        |
| RPL17                              | 6139            | Rpl17          | 319195          | ✓                                        |
| RPL18                              | 6141            | Rpl18          | 19899           | ✓                                        |

|          |        |               |        |   |
|----------|--------|---------------|--------|---|
| RPL3     | 6122   | Rpl3          | 27367  | ✓ |
| RPL31    | 6160   | Rpl31         | 114641 | ✓ |
| RPL37    | 6167   | Rpl37         | 67281  | ✓ |
| RPL4     | 6124   | Rpl4          | 67891  | ✓ |
| RPL6     | 6128   | Rpl6          | 19988  | ✓ |
| RPL9     | 6133   | Rpl9          | 20005  | ✓ |
| RUVBL2   | 10856  | Ruvbl2        | 20174  | ✓ |
| SELPLG   | 6404   | Selpl         | 20345  | ✓ |
| SEPT2    | 4735   | Sept2         | 18000  | ✓ |
| SF3B3    | 23450  | Sf3b3         | 101943 | ✓ |
| SNRPD2   | 6633   | Snrpd2        | 107686 | ✓ |
| SNRPE    | 6635   | Snrpe         | 20643  | ✓ |
| TRIP10   | 9322   | Trip10        | 106628 | ✓ |
| TXNDC12  | 51060  | Txndc12       | 66073  | ✓ |
| U2AF2    | 11338  | U2af2         | 22185  | ✓ |
| USO1     | 8615   | Uso1          | 56041  | ✓ |
| VTA1     | 51534  | 1110059P08Rik | 66201  | ✓ |
| WNT8B    | 7479   | Wnt8b         | 22423  | ✓ |
| YWHAE    | 7531   | Ywhae         | 22627  | ✓ |
| AADAACL1 | 57552  | Nceh1         | 320024 | X |
| ABCB1    | 5243   | Abcb1a        | 18671  | X |
| ABCB5    | 340273 | Abcb5         | 77706  | X |
| ABCB7    | 22     | Abcb7         | 11306  | X |
| ABCB8    | 11194  | Abcb8         | 74610  | X |
| ABCC1    | 4363   | Abcc1         | 17250  | X |
| ABCC10   | 89845  | Abcc10        | 224814 | X |
| ABCC8    | 6833   | Abcc8         | 20927  | X |
| ABCD2    | 225    | Abcd2         | 26874  | X |
| ABCD3    | 5825   | Abcd3         | 19299  | X |
| ABCG8    | 64241  | Abcg8         | 67470  | X |
| ABHD3    | 171586 | Abhd3         | 106861 | X |
| ABLIM1   | 3983   | Ablim1        | 226251 | X |
| ACF      | 29974  | A1cf          | 69865  | X |
| ACP5     | 54     | Acp5          | 11433  | X |
| ACTL6A   | 86     | Actl6a        | 56456  | X |
| ACYP1    | 97     | Acyp1         | 66204  | X |
| ADAMDEC1 | 27299  | Adamdec1      | 58860  | X |
| ADAMTS4  | 9507   | Adamts4       | 240913 | X |
| ADIPOR1  | 51094  | Adipor1       | 72674  | X |
| ADORA2B  | 136    | Adora2b       | 11541  | X |
| AFM      | 173    | Afm           | 280662 | X |
| AGPAT1   | 10554  | Agpat1        | 55979  | X |
| AGPAT2   | 10555  | Agpat2        | 67512  | X |
| AGTRAP   | 57085  | Agtrap        | 11610  | X |
| AIFL     | 150209 | Aifm3         | 72168  | X |
| AIFM1    | 9131   | Aifm1         | 26926  | X |
| AIFM2    | 84883  | Aifm2         | 71361  | X |
| ALB      | 213    | Alb           | 11657  | X |
| ALDH16A1 | 126133 | Aldh16a1      | 69748  | X |
| ALF      | 11036  | Gtf2a1l       | 71828  | X |
| ALG8     | 79053  | Alg8          | 381903 | X |
| ALKBH2   | 121642 | Alkbh2        | 231642 | X |
| ALKBH3   | 221120 | Alkbh3        | 69113  | X |
| ALOXE3   | 59344  | Aloxe3        | 23801  | X |
| ANK2     | 287    | Ank2          | 109676 | X |

|         |        |         |           |   |
|---------|--------|---------|-----------|---|
| ANKFY1  | 51479  | Ankfy1  | 11736     | X |
| ANKH    | 56172  | Ank     | 11732     | X |
| ANKRD37 | 353322 | Ankrd37 | 654824    | X |
| ANKRD49 | 54851  | Ankrd49 | 56503     | X |
| ANTXR1  | 84168  | Antxr1  | 69538     | X |
| ANTXR2  | 118429 | Antxr2  | 71914     | X |
| AP1B1   | 162    | Ap1b1   | 11764     | X |
| AP1G1   | 164    | Ap1g1   | 11765     | X |
| AP1G2   | 8906   | Ap1g2   | 11766     | X |
| AP1M1   | 8907   | Ap1m1   | 11767     | X |
| AP1S3   | 130340 | Ap1s3   | 252903    | X |
| AP2A1   | 160    | Ap2a1   | 11771     | X |
| AP2A2   | 161    | Ap2a2   | 11772     | X |
| AP3B1   | 8546   | Ap3b1   | 11774     | X |
| AP3D1   | 8943   | Ap3d1   | 11776     | X |
| APBB1IP | 54518  | Apbb1ip | 54519     | X |
| API5    | 8539   | Api5    | 11800     | X |
| APOB    | 338    | Apob    | 238055    | X |
| APOM    | 55937  | Apom    | 55938     | X |
| APOO    | 79135  | Apoo    | 68316     | X |
| APPBP2  | 10513  | Appbp2  | 66884     | X |
| AQP2    | 359    | Aqp2    | 11827     | X |
| AQP5    | 362    | Aqp5    | 11830     | X |
| AQP8    | 343    | Aqp8    | 11833     | X |
| ARCN1   | 372    | Arcn1   | 213827    | X |
| ARD1A   | 8260   | Naa10   | 56292     | X |
| ARFIP2  | 23647  | Arfip2  | 76932     | X |
| ARHGEF9 | 23229  | Arhgef9 | 236915    | X |
| ARL13B  | 200894 | Arl13b  | 68146     | X |
| ARL9    | 132946 | Arl9    | 384185    | X |
| ASGR2   | 433    | Asgr2   | 11890     | X |
| ATIC    | 471    | Atic    | 108147    | X |
| ATP4A   | 495    | Atp4a   | 11944     | X |
| ATRN    | 8455   | Atrn    | 11990     | X |
| ATRNL1  | 26033  | Atrnl1  | 226255    | X |
| AUP1    | 550    | Aup1    | 11993     | X |
| B3GAT3  | 26229  | B3gat3  | 72727     | X |
| B3GNT2  | 10678  | B3gnt2  | 53625     | X |
| B4GALT1 | 2683   | B4galt1 | 14595     | X |
| B4GALT7 | 11285  | B4galt7 | 218271    | X |
| BAG5    | 9529   | Bag5    | 70369     | X |
| BBOX1   | 8424   | Bbox1   | 170442    | X |
| BCAT2   | 587    | Bcat2   | 12036     | X |
| BCDO2   | 83875  | Bco2    | 170752    | X |
| BCMO1   | 53630  | Bcmo1   | 63857     | X |
| BDNF    | 627    | Bdnf    | 12064     | X |
| BICD2   | 23299  | Bicd2   | 76895     | X |
| BIRC6   | 57448  | Birc6   | 12211     | X |
| BMP6    | 654    | Bmp6    | 12161     | X |
| BMP8A   | 353500 | Bmp8a   | 12163     | X |
| BRE     | 9577   | Bre     | 107976    | X |
| BRWD1   | 54014  | Brwd1   | 93871     | X |
| BTN1A1  | 696    | Btn1a1  | 12231     | X |
| BTN3A2  | 11118  | Btnl4   | 632126    | X |
| BTNL3   | 10917  | Btnl1   | 100038862 | X |

|           |        |               |        |   |
|-----------|--------|---------------|--------|---|
| BZRAP1    | 9256   | Bzrap1        | 207777 | X |
| C10ORF33  | 84795  | Pyroxd2       | 74580  | X |
| C11ORF71  | 54494  | Gm5617        | 434402 | X |
| C12ORF24  | 29902  | 1500011H22Rik | 68948  | X |
| C13ORF1   | 57213  | 6330409N04Rik | 66674  | X |
| C14ORF108 | 55745  | Mudeng        | 74385  | X |
| C16ORF61  | 56942  | 2310061C15Rik | 66531  | X |
| C18ORF24  | 220134 | Ska1          | 66468  | X |
| C19ORF61  | 56006  | 1500002O20Rik | 71997  | X |
| C1ORF103  | 55791  | 4933421E11Rik | 321000 | X |
| C1ORF141  | 400757 | 4921539E11Rik | 70941  | X |
| C1ORF183  | 55924  | 6530418L21Rik | 109050 | X |
| C1ORF41   | 51668  | Hspb11        | 72938  | X |
| C1ORF9    | 51430  | Al848100      | 226551 | X |
| C1QB      | 713    | C1qb          | 12260  | X |
| C6        | 729    | C6            | 12274  | X |
| C6ORF192  | 116843 | 1110021L09Rik | 76306  | X |
| C7        | 730    | C7            | 109828 | X |
| C7ORF16   | 10842  | Ppp1r17       | 19051  | X |
| C8G       | 733    | C8g           | 69379  | X |
| C8ORF13   | 83648  | Fam167a       | 219148 | X |
| C9ORF131  | 138724 | 1700022111Rik | 67317  | X |
| CABP2     | 51475  | Cabp2         | 29866  | X |
| CALN1     | 83698  | Caln1         | 140904 | X |
| CAPNS2    | 84290  | Capns2        | 69543  | X |
| CASC3     | 22794  | Casc3         | 192160 | X |
| CASP8AP2  | 9994   | Casp8ap2      | 26885  | X |
| CAT       | 847    | Cat           | 12359  | X |
| CBLN1     | 869    | Cbln1         | 12404  | X |
| CBX1      | 10951  | Cbx1          | 12412  | X |
| CBX5      | 23468  | Cbx5          | 12419  | X |
| CC2D1A    | 54862  | Cc2d1a        | 212139 | X |
| CCAR1     | 55749  | Ccar1         | 67500  | X |
| CCDC28A   | 25901  | Ccdc28a       | 215814 | X |
| CCDC5     | 115106 | Haus1         | 225745 | X |
| CCDC76    | 54482  | Ccdc76        | 229780 | X |
| CCDC93    | 54520  | Ccdc93        | 70829  | X |
| CCL11     | 6356   | Ccl11         | 20292  | X |
| CCL25     | 6370   | Ccl25         | 20300  | X |
| CCL27     | 10850  | Ccl27a        | 20301  | X |
| CCL3      | 6348   | Ccl3          | 20302  | X |
| CCL7      | 6354   | Ccl7          | 20306  | X |
| CCT6A     | 908    | Cct6a         | 12466  | X |
| CD151     | 977    | Cd151         | 12476  | X |
| CD160     | 11126  | Cd160         | 54215  | X |
| CD164     | 8763   | Cd164         | 53599  | X |
| CD2       | 914    | Cd2           | 12481  | X |
| CD200     | 4345   | Cd200         | 17470  | X |
| CD22      | 933    | Cd22          | 12483  | X |
| CD226     | 10666  | Cd226         | 225825 | X |
| CD247     | 919    | Cd247         | 12503  | X |
| CD2BP2    | 10421  | Cd2bp2        | 70233  | X |
| CD300C    | 10871  | Cd300c        | 387565 | X |
| CD33      | 945    | Cd33          | 12489  | X |
| CD3D      | 915    | Cd3d          | 12500  | X |

|         |        |         |        |   |
|---------|--------|---------|--------|---|
| CD3G    | 917    | Cd3g    | 12502  | X |
| CD40LG  | 959    | Cd40lg  | 21947  | X |
| CD44    | 960    | Cd44    | 12505  | X |
| CD46    | 4179   | Cd46    | 17221  | X |
| CD5     | 921    | Cd5     | 12507  | X |
| CD52    | 1043   | Cd52    | 23833  | X |
| CD59    | 966    | Cd59b   | 333883 | X |
| CD5L    | 922    | Cd5l    | 11801  | X |
| CD72    | 971    | Cd72    | 12517  | X |
| CD80    | 941    | Cd80    | 12519  | X |
| CD81    | 975    | Cd81    | 12520  | X |
| CD84    | 8832   | Cd84    | 12523  | X |
| CD8B    | 926    | Cd8b1   | 12526  | X |
| CDCA4   | 55038  | Cdca4   | 71963  | X |
| CDCP2   | 200008 | Cdcp2   | 242603 | X |
| CDK2AP1 | 8099   | Cdk2ap1 | 13445  | X |
| CENPA   | 1058   | Cenpa   | 12615  | X |
| CENPF   | 1063   | Cenpf   | 108000 | X |
| CENPJ   | 55835  | Cenpj   | 219103 | X |
| CEP250  | 11190  | Cep250  | 16328  | X |
| CEP55   | 55165  | Cep55   | 74107  | X |
| CEP78   | 84131  | Cep78   | 208518 | X |
| CEPT1   | 10390  | Cept1   | 99712  | X |
| CFD     | 1675   | Cfd     | 11537  | X |
| CHAT    | 1103   | Chat    | 12647  | X |
| CHRD    | 8646   | Chrd    | 12667  | X |
| CHRNA1  | 1134   | Chrna1  | 11435  | X |
| CHRNA10 | 57053  | Chrna10 | 504186 | X |
| CHRNA2  | 1135   | Chrna2  | 110902 | X |
| CHRNA6  | 8973   | Chrna6  | 11440  | X |
| CHRNA7  | 1139   | Chrna7  | 11441  | X |
| CHRNA9  | 55584  | Chrna9  | 231252 | X |
| CHRN1   | 1140   | Chrn1   | 11443  | X |
| CHRN4   | 1143   | Chrn4   | 108015 | X |
| CIRH1A  | 84916  | Cirh1a  | 21771  | X |
| CKAP5   | 9793   | Ckap5   | 75786  | X |
| CKLF    | 51192  | Ckif    | 75458  | X |
| CLEC11A | 6320   | Clec11a | 20256  | X |
| CLEC12A | 160364 | Clec12a | 232413 | X |
| CLEC1A  | 51267  | Clec1a  | 243653 | X |
| CLEC1B  | 51266  | Clec1b  | 56760  | X |
| CLEC2D  | 29121  | Clec2i  | 93675  | X |
| CLEC3B  | 7123   | Clec3b  | 21922  | X |
| CLEC4G  | 339390 | Clec4g  | 75863  | X |
| CNOT6   | 57472  | Cnot6   | 104625 | X |
| CNTF    | 1270   | Cntf    | 12803  | X |
| CNTNAP1 | 8506   | Cntnap1 | 53321  | X |
| COG2    | 22796  | Cog2    | 76332  | X |
| COLEC10 | 10584  | Colec10 | 239447 | X |
| COPA    | 1314   | Copa    | 12847  | X |
| COPS6   | 10980  | Cops6   | 26893  | X |
| COPZ1   | 22818  | Copz1   | 56447  | X |
| COPZ2   | 51226  | Copz2   | 56358  | X |
| COQ2    | 27235  | Coq2    | 71883  | X |
| COQ6    | 51004  | Coq6    | 217707 | X |

|          |        |            |        |   |
|----------|--------|------------|--------|---|
| CPT1B    | 1375   | Cpt1b      | 12895  | X |
| CRAT     | 1384   | Crat       | 12908  | X |
| CRLF3    | 51379  | Crlf3      | 54394  | X |
| CRYL1    | 51084  | Cryl1      | 68631  | X |
| CSDC2    | 27254  | Csdc2      | 105859 | X |
| CSF1     | 1435   | Csf1       | 12977  | X |
| CSF3R    | 1441   | Csf3r      | 12986  | X |
| CSNK1E   | 1454   | Csnk1e     | 27373  | X |
| CTF1     | 1489   | Ctf1       | 13019  | X |
| CTHRC1   | 115908 | Cthrc1     | 68588  | X |
| CTNNA1   | 1495   | Ctnna1     | 12385  | X |
| CTNS     | 1497   | Ctns       | 83429  | X |
| CTR9     | 9646   | Ctr9       | 22083  | X |
| CTSA     | 5476   | Ctsa       | 19025  | X |
| CTSZ     | 1522   | Ctsz       | 64138  | X |
| CXADR    | 1525   | Cxadr      | 13052  | X |
| CXCL1    | 2919   | Cxcl1      | 14825  | X |
| CXCL11   | 6373   | Cxcl11     | 56066  | X |
| CXCL14   | 9547   | Cxcl14     | 57266  | X |
| CYB561D1 | 284613 | Cyb561d1   | 72023  | X |
| CYB5A    | 1528   | Cyb5       | 109672 | X |
| CYB5B    | 80777  | Cyb5b      | 66427  | X |
| CYBA     | 1535   | Cyba       | 13057  | X |
| CYBASC3  | 220002 | Cybasc3    | 225912 | X |
| CYCS     | 54205  | Cycs       | 13063  | X |
| CYLC2    | 1539   | Cylc2      | 74914  | X |
| CYP11A1  | 1583   | Cyp11a1    | 13070  | X |
| CYP11B1  | 1584   | Cyp11b1    | 110115 | X |
| CYP11B2  | 1585   | Cyp11b2    | 13072  | X |
| CYP17A1  | 1586   | Cyp17a1    | 13074  | X |
| CYP19A1  | 1588   | Cyp19a1    | 13075  | X |
| CYP1A1   | 1543   | Cyp1a1     | 13076  | X |
| CYP1A2   | 1544   | Cyp1a2     | 13077  | X |
| CYP1B1   | 1545   | Cyp1b1     | 13078  | X |
| CYP20A1  | 57404  | Cyp20a1    | 77951  | X |
| CYP21A2  | 1589   | Cyp21a2-ps | 632302 | X |
| CYP24A1  | 1591   | Cyp24a1    | 13081  | X |
| CYP26A1  | 1592   | Cyp26a1    | 13082  | X |
| CYP26B1  | 56603  | Cyp26b1    | 232174 | X |
| CYP26C1  | 340665 | Cyp26c1    | 546726 | X |
| CYP27A1  | 1593   | Cyp27a1    | 104086 | X |
| CYP27B1  | 1594   | Cyp27b1    | 13115  | X |
| CYP2A13  | 1553   | Cyp2a4     | 13086  | X |
| CYP2B6   | 1555   | Cyp2b10    | 13088  | X |
| CYP2C18  | 1562   | Cyp2c50    | 107141 | X |
| CYP2C19  | 1557   | Cyp2c65    | 72303  | X |
| CYP2C8   | 1558   | Cyp2c29    | 13095  | X |
| CYP2C9   | 1559   | Cyp2c55    | 72082  | X |
| CYP2D6   | 1565   | Cyp2d22    | 56448  | X |
| CYP2F1   | 1572   | Cyp2f2     | 13107  | X |
| CYP2J2   | 1573   | Cyp2j6     | 13110  | X |
| CYP2R1   | 120227 | Cyp2r1     | 244209 | X |
| CYP2U1   | 113612 | Cyp2u1     | 71519  | X |
| CYP2W1   | 54905  | Cyp2w1     | 545817 | X |
| CYP39A1  | 51302  | Cyp39a1    | 56050  | X |

|          |        |          |        |   |
|----------|--------|----------|--------|---|
| CYP3A43  | 64816  | Cyp3a57  | 622127 | X |
| CYP3A5   | 1577   | Cyp3a41a | 53973  | X |
| CYP4B1   | 1580   | Cyp4b1   | 13120  | X |
| CYP4F11  | 57834  | Cyp4f40  | 631304 | X |
| CYP4F12  | 66002  | Cyp4f14  | 64385  | X |
| CYP4F2   | 8529   | Cyp4f18  | 72054  | X |
| CYP4F22  | 126410 | Cyp4f39  | 320997 | X |
| CYP4F3   | 4051   | Cyp4f13  | 170716 | X |
| CYP4X1   | 260293 | Cyp4x1   | 81906  | X |
| CYP51A1  | 1595   | Cyp51    | 13121  | X |
| CYP7A1   | 1581   | Cyp7a1   | 13122  | X |
| CYP7B1   | 9420   | Cyp7b1   | 13123  | X |
| CYP8B1   | 1582   | Cyp8b1   | 13124  | X |
| CYTH1    | 9267   | Cyth1    | 19157  | X |
| CYTH2    | 9266   | Cyth2    | 19158  | X |
| DAB1     | 1600   | Dab1     | 13131  | X |
| DBI      | 1622   | Dbi      | 13167  | X |
| DBN1     | 1627   | Dbn1     | 56320  | X |
| DCBLD2   | 131566 | Dcbld2   | 73379  | X |
| DCLRE1B  | 64858  | Dclre1b  | 140917 | X |
| DCTN1    | 1639   | Dctn1    | 13191  | X |
| DDIT4    | 54541  | Ddit4    | 74747  | X |
| DDOST    | 1650   | Ddost    | 13200  | X |
| DEGS1    | 8560   | Degs1    | 13244  | X |
| DEPDC1B  | 55789  | Depdc1b  | 218581 | X |
| DERL1    | 79139  | Derl1    | 67819  | X |
| DGAT2L3  | 158833 | Awat1    | 245533 | X |
| DGKE     | 8526   | Dgke     | 56077  | X |
| DHRS13   | 147015 | Dhrs13   | 70451  | X |
| DHX34    | 9704   | Dhx34    | 71723  | X |
| DIABLO   | 56616  | Diablo   | 66593  | X |
| DLEU2    | 8847   | Dleu2    | 668253 | X |
| DLGAP5   | 9787   | Dlgap5   | 218977 | X |
| DNAJC16  | 23341  | Dnajc16  | 214063 | X |
| DOCK5    | 80005  | Dock5    | 68813  | X |
| DPM2     | 8818   | Dpm2     | 13481  | X |
| DSCAM    | 1826   | Dscam    | 13508  | X |
| DUS2L    | 54920  | Dus2l    | 66369  | X |
| DUSP12   | 11266  | Dusp12   | 80915  | X |
| DYNLT1   | 6993   | Dynlt1b  | 21648  | X |
| E2F5     | 1875   | E2f5     | 13559  | X |
| EARS2    | 124454 | Ears2    | 67417  | X |
| EBAG9    | 9166   | Ebag9    | 55960  | X |
| EBI3     | 10148  | Ebi3     | 50498  | X |
| EBNA1BP2 | 10969  | Ebna1bp2 | 69072  | X |
| EDA      | 1896   | Eda      | 13607  | X |
| EEF1E1   | 9521   | Eef1e1   | 66143  | X |
| EFHD1    | 80303  | Efhd1    | 98363  | X |
| EFNA2    | 1943   | Efna2    | 13637  | X |
| EFNA3    | 1944   | Efna3    | 13638  | X |
| EFNA4    | 1945   | Efna4    | 13639  | X |
| EFNA5    | 1946   | Efna5    | 13640  | X |
| EFNB2    | 1948   | Efnb2    | 13642  | X |
| EHHADH   | 1962   | Ehhadh   | 74147  | X |
| EIF1     | 10209  | Eif1     | 20918  | X |

|          |        |           |        |   |
|----------|--------|-----------|--------|---|
| EIF1AX   | 1964   | Eif1a     | 13664  | X |
| EIF4B    | 1975   | Eif4b     | 75705  | X |
| EIF4E    | 1977   | Eif4e     | 13684  | X |
| EIF4EBP1 | 1978   | Eif4ebp1  | 13685  | X |
| EIF4EBP3 | 8637   | Eif4ebp3  | 108112 | X |
| EIF5A    | 1984   | Eif5a     | 276770 | X |
| EIF5B    | 9669   | Eif5b     | 226982 | X |
| EMP2     | 2013   | Emp2      | 13731  | X |
| ENC1     | 8507   | Enc1      | 13803  | X |
| EPB41L4B | 54566  | Epb4.1l4b | 54357  | X |
| EPOR     | 2057   | Epor      | 13857  | X |
| EPS8L3   | 79574  | Eps8l3    | 99662  | X |
| ERAP1    | 51752  | Erap1     | 80898  | X |
| ERBB2IP  | 55914  | Erb2ip    | 59079  | X |
| ERGIC1   | 57222  | Ergic1    | 67458  | X |
| ERLIN1   | 10613  | Erlin1    | 226144 | X |
| ETAA1    | 54465  | Etaa1     | 68145  | X |
| ETFA     | 2108   | Etfa      | 110842 | X |
| ETFB     | 2109   | Etfb      | 110826 | X |
| EXOC5    | 10640  | Exoc5     | 105504 | X |
| EXOC6    | 54536  | Exoc6     | 107371 | X |
| EXOSC2   | 23404  | Exosc2    | 227715 | X |
| EXOSC4   | 54512  | Exosc4    | 109075 | X |
| EYA4     | 2070   | Eya4      | 14051  | X |
| F11R     | 50848  | F11r      | 16456  | X |
| F3       | 2152   | F3        | 14066  | X |
| FABP3    | 2170   | Fabp3     | 14077  | X |
| FABP5    | 2171   | Fabp5     | 16592  | X |
| FABP6    | 2172   | Fabp6     | 16204  | X |
| FADS1    | 3992   | Fads1     | 76267  | X |
| FADS2    | 9415   | Fads2     | 56473  | X |
| FADS3    | 3995   | Fads3     | 60527  | X |
| FADS6    | 283985 | Fads6     | 328035 | X |
| FAHD1    | 81889  | Fahd1     | 68636  | X |
| FAM33A   | 348235 | Fam33a    | 66140  | X |
| FAM64A   | 54478  | Fam64a    | 109212 | X |
| FAM89B   | 23625  | Fam89b    | 17826  | X |
| FAT      | 2195   | Fat1      | 14107  | X |
| FBXL19   | 54620  | Fbxl19    | 233902 | X |
| FCAMR    | 83953  | Fcamr     | 64435  | X |
| FCER1G   | 2207   | Fcer1g    | 14127  | X |
| FCGBP    | 8857   | Fcgbp     | 215384 | X |
| FCRL3    | 115352 | Fcrl5     | 329693 | X |
| FDPS     | 2224   | Fdps      | 110196 | X |
| FEM1A    | 55527  | Fem1a     | 14154  | X |
| FEM1B    | 10116  | Fem1b     | 14155  | X |
| FEZ1     | 9638   | Fez1      | 235180 | X |
| FEZ2     | 9637   | Fez2      | 225020 | X |
| FGF1     | 2246   | Fgf1      | 14164  | X |
| FGF10    | 2255   | Fgf10     | 14165  | X |
| FGF13    | 2258   | Fgf13     | 14168  | X |
| FGF21    | 26291  | Fgf21     | 56636  | X |
| FGF22    | 27006  | Fgf22     | 67112  | X |
| FGF23    | 8074   | Fgf23     | 64654  | X |
| FGF5     | 2250   | Fgf5      | 14176  | X |



|          |        |         |        |   |
|----------|--------|---------|--------|---|
| FGF8     | 2253   | Fgf8    | 14179  | X |
| FKBP3    | 2287   | Fkbp3   | 30795  | X |
| FLJ10404 | 54540  | Fam193b | 212483 | X |
| FLJ20152 | 54463  | Fam134b | 66270  | X |
| FLJ20323 | 54468  | Mios    | 252875 | X |
| FLJ20674 | 54621  | Vsig10  | 231668 | X |
| FLJ38482 | 201931 | Tmem192 | 73067  | X |
| FLNA     | 2316   | Flna    | 192176 | X |
| FLNB     | 2317   | Flnb    | 286940 | X |
| FLNC     | 2318   | Flnc    | 68794  | X |
| FLVCR1   | 28982  | Mfsd7b  | 226844 | X |
| FMO1     | 2326   | Fmo1    | 14261  | X |
| FMO2     | 2327   | Fmo2    | 55990  | X |
| FMO3     | 2328   | Fmo3    | 14262  | X |
| FMO4     | 2329   | Fmo4    | 226564 | X |
| FMO5     | 2330   | Fmo5    | 14263  | X |
| FOLR2    | 2350   | Folr2   | 14276  | X |
| FOXF1    | 2294   | Foxf1a  | 15227  | X |
| FOXRED2  | 80020  | Foxred2 | 239554 | X |
| FRAT1    | 10023  | Frat1   | 14296  | X |
| FRS3     | 10817  | Frs3    | 107971 | X |
| FST      | 10468  | Fst     | 14313  | X |
| FUT11    | 170384 | Fut11   | 73068  | X |
| FUT8     | 2530   | Fut8    | 53618  | X |
| GABPB1   | 2553   | Gabpb1  | 14391  | X |
| GABRB1   | 2560   | Gabrb1  | 14400  | X |
| GABRG3   | 2567   | Gabrg3  | 14407  | X |
| GABRP    | 2568   | Gabrp   | 216643 | X |
| GABRQ    | 55879  | Gabrq   | 57249  | X |
| GABRR1   | 2569   | Gabrr1  | 14408  | X |
| GABRR2   | 2570   | Gabrr2  | 14409  | X |
| GDF15    | 9518   | Gdf15   | 23886  | X |
| GDF2     | 2658   | Gdf2    | 12165  | X |
| GDF3     | 9573   | Gdf3    | 14562  | X |
| GDF5     | 8200   | Gdf5    | 14563  | X |
| GDF9     | 2661   | Gdf9    | 14566  | X |
| GFOD2    | 81577  | Gfod2   | 70575  | X |
| GFRA2    | 2675   | Gfra2   | 14586  | X |
| GFRA4    | 64096  | Gfra4   | 14588  | X |
| GGA2     | 23062  | Gga2    | 74105  | X |
| GGA3     | 23163  | Gga3    | 260302 | X |
| GH1      | 2688   | Gh      | 14599  | X |
| GJA3     | 2700   | Gja3    | 14611  | X |
| GJA4     | 2701   | Gja4    | 14612  | X |
| GJB1     | 2705   | Gjb1    | 14618  | X |
| GJB2     | 2706   | Gjb2    | 14619  | X |
| GLRA3    | 8001   | Glra3   | 110304 | X |
| GLRX     | 2745   | Glrx    | 93692  | X |
| GLRX2    | 51022  | Glrx2   | 69367  | X |
| GLRX3    | 10539  | Glrx3   | 30926  | X |
| GNG8     | 94235  | Gng8    | 14709  | X |
| GOLGA4   | 2803   | Golga4  | 54214  | X |
| GP6      | 51206  | Gp6     | 243816 | X |
| GPA33    | 10223  | Gpa33   | 59290  | X |
| GPBAR1   | 151306 | Gpbar1  | 227289 | X |

|          |        |               |           |   |
|----------|--------|---------------|-----------|---|
| GPR107   | 57720  | Gpr107        | 277463    | X |
| GPR119   | 139760 | Gpr119        | 236781    | X |
| GPR152   | 390212 | Gpr152        | 269053    | X |
| GPR153   | 387509 | Gpr153        | 100129    | X |
| GPR158   | 57512  | Gpr158        | 241263    | X |
| GPR180   | 160897 | Gpr180        | 58245     | X |
| GRASP    | 160622 | Grasp         | 56149     | X |
| GRB10    | 2887   | Grb10         | 14783     | X |
| GRB7     | 2886   | Grb7          | 14786     | X |
| GRID1    | 2894   | Grid1         | 14803     | X |
| GRID2    | 2895   | Grid2         | 14804     | X |
| GRIK1    | 2897   | Grik1         | 14805     | X |
| GRIK2    | 2898   | Grik2         | 14806     | X |
| GRIK3    | 2899   | Grik3         | 14807     | X |
| GRIK4    | 2900   | Grik4         | 110637    | X |
| GRIK5    | 2901   | Grik5         | 14809     | X |
| GRIN1    | 2902   | Grin1         | 14810     | X |
| GRIN2A   | 2903   | Grin2a        | 14811     | X |
| GRIN2B   | 2904   | Grin2b        | 14812     | X |
| GRIN2C   | 2905   | Grin2c        | 14813     | X |
| GRIN2D   | 2906   | Grin2d        | 14814     | X |
| GRIN3A   | 116443 | Grin3a        | 242443    | X |
| GRINA    | 2907   | Grina         | 66168     | X |
| GUCA1A   | 2978   | Guca1a        | 14913     | X |
| GUCY1A3  | 2982   | Gucy1a3       | 60596     | X |
| GUCY1B3  | 2983   | Gucy1b3       | 54195     | X |
| H2AFZ    | 3015   | H2afz         | 51788     | X |
| H3F3B    | 3021   | H3f3b         | 15081     | X |
| HAAO     | 23498  | HaaO          | 107766    | X |
| HBE1     | 3046   | Hbb-y         | 15135     | X |
| HBEGF    | 1839   | Hbegf         | 15200     | X |
| HBQ1     | 3049   | Hbq1a         | 216635    | X |
| HDAC1    | 3065   | Hdac1         | 433759    | X |
| HEMK1    | 51409  | Hemk1         | 69536     | X |
| HEPH     | 9843   | Heph          | 15203     | X |
| HERPUD2  | 64224  | Herpud2       | 80517     | X |
| HERV-FRD | 405754 | Synb          | 239167    | X |
| HGFAC    | 3083   | Hgfac         | 54426     | X |
| HINT2    | 84681  | Hint2         | 68917     | X |
| HLA-B    | 3106   | H2-Q1         | 15006     | X |
| HLA-C    | 3107   | H2-D1         | 14964     | X |
| HLA-DMA  | 3108   | H2-DMa        | 14998     | X |
| HLA-DMB  | 3109   | H2-DMb1       | 14999     | X |
| HLA-DOA  | 3111   | H2-Oa         | 15001     | X |
| HLA-DPA1 | 3113   | H2-Pa         | 15003     | X |
| HLA-DQB1 | 3119   | H2-Ab1        | 14961     | X |
| HLA-DRA  | 3122   | H2-Ea-ps      | 100504404 | X |
| HLA-E    | 3133   | C920025E04Rik | 667803    | X |
| HMGCLL1  | 54511  | Hmgcll1       | 208982    | X |
| HN1L     | 90861  | Hn1l          | 52009     | X |
| HNRNPA1  | 3178   | Hnrnpa1       | 15382     | X |
| HNRNPK   | 3190   | Hnrnpk        | 15387     | X |
| HNRNPM   | 4670   | Hnrnpm        | 76936     | X |
| HOXD3    | 3232   | Hoxd3         | 15434     | X |
| HPD      | 3242   | Hpd           | 15445     | X |

|          |        |          |        |   |
|----------|--------|----------|--------|---|
| HRAS     | 3265   | Hras1    | 15461  | X |
| HRC      | 3270   | Hrc      | 15464  | X |
| HS6ST1   | 9394   | Hs6st1   | 50785  | X |
| HSDL2    | 84263  | Hsdl2    | 72479  | X |
| HSPC111  | 51491  | Nop16    | 28126  | X |
| HSPE1    | 3336   | Hspe1    | 15528  | X |
| HTR1D    | 3352   | Htr1d    | 15552  | X |
| HTR6     | 3362   | Htr6     | 15565  | X |
| HYAL1    | 3373   | Hyal1    | 15586  | X |
| HYAL2    | 8692   | Hyal2    | 15587  | X |
| HYAL3    | 8372   | Hyal3    | 109685 | X |
| HYLS1    | 219844 | Hyls1    | 76832  | X |
| ICK      | 22858  | Ick      | 56542  | X |
| ICOSLG   | 23308  | Icosl    | 50723  | X |
| IFNAR2   | 3455   | Ifnar2   | 15976  | X |
| IFNGR1   | 3459   | Ifngr1   | 15979  | X |
| IFNK     | 56832  | Ifnk     | 387510 | X |
| IFRD2    | 7866   | Ifrd2    | 15983  | X |
| IFT57    | 55081  | Ift57    | 73916  | X |
| IGF2     | 3481   | Igf2     | 16002  | X |
| IGFBP3   | 3486   | Igfbp3   | 16009  | X |
| IGFBP4   | 3487   | Igfbp4   | 16010  | X |
| IGFBP5   | 3488   | Igfbp5   | 16011  | X |
| IGFBP6   | 3489   | Igfbp6   | 16012  | X |
| IGSF10   | 285313 | Igsf10   | 242050 | X |
| IL10RA   | 3587   | Il10ra   | 16154  | X |
| IL12A    | 3592   | Il12a    | 16159  | X |
| IL12RB2  | 3595   | Il12rb2  | 16162  | X |
| IL13RA1  | 3597   | Il13ra1  | 16164  | X |
| IL13RA2  | 3598   | Il13ra2  | 16165  | X |
| IL15     | 3600   | Il15     | 16168  | X |
| IL16     | 3603   | Il16     | 16170  | X |
| IL17C    | 27189  | Il17c    | 234836 | X |
| IL17F    | 112744 | Il17f    | 257630 | X |
| IL17RE   | 132014 | Il17re   | 57890  | X |
| IL18     | 3606   | Il18     | 16173  | X |
| IL18BP   | 10068  | Il18bp   | 16068  | X |
| IL19     | 29949  | Il19     | 329244 | X |
| IL1F6    | 27179  | Il1f6    | 54448  | X |
| IL1F9    | 56300  | Il1f9    | 215257 | X |
| IL1R2    | 7850   | Il1r2    | 16178  | X |
| IL1RAP   | 3556   | Il1rap   | 16180  | X |
| IL1RAPL1 | 11141  | Il1rapl1 | 331461 | X |
| IL1RL2   | 8808   | Il1rl2   | 107527 | X |
| IL2      | 3558   | Il2      | 16183  | X |
| IL23R    | 149233 | Il23r    | 209590 | X |
| IL24     | 11009  | Il24     | 93672  | X |
| IL27     | 246778 | Il27     | 246779 | X |
| IL27RA   | 9466   | Il27ra   | 50931  | X |
| IL28A    | 282616 | Il28a    | 330496 | X |
| IL2RA    | 3559   | Il2ra    | 16184  | X |
| IL3      | 3562   | Il3      | 16187  | X |
| IL4      | 3565   | Il4      | 16189  | X |
| IL5RA    | 3568   | Il5ra    | 16192  | X |
| IL6ST    | 3572   | Il6st    | 16195  | X |

|          |        |               |           |   |
|----------|--------|---------------|-----------|---|
| IL7      | 3574   | Il7           | 16196     | X |
| IL7R     | 3575   | Il7r          | 16197     | X |
| IL9R     | 3581   | Il9r          | 16199     | X |
| IMP4     | 92856  | Imp4          | 27993     | X |
| IMPG2    | 50939  | Impg2         | 224224    | X |
| INA      | 9118   | Ina           | 226180    | X |
| INHA     | 3623   | Inha          | 16322     | X |
| INHBB    | 3625   | Inhbb         | 16324     | X |
| IPO4     | 79711  | Ipo4          | 75751     | X |
| IRF2BP2  | 359948 | Irf2bp2       | 270110    | X |
| IRS4     | 8471   | Irs4          | 16370     | X |
| ISCU     | 23479  | Iscu          | 66383     | X |
| ITGAE    | 3682   | Itgae         | 16407     | X |
| ITIH1    | 3697   | Itih1         | 16424     | X |
| ITM2B    | 9445   | Itm2b         | 16432     | X |
| ITPR3    | 3710   | Itp3          | 16440     | X |
| IYD      | 389434 | Iyd           | 70337     | X |
| JPH4     | 84502  | Jph4          | 319984    | X |
| JTV1     | 7965   | Aimp2         | 231872    | X |
| KDELR1   | 10945  | Kdelr1        | 68137     | X |
| KDELR2   | 11014  | Kdelr2        | 66913     | X |
| KDELR3   | 11015  | Kdelr3        | 105785    | X |
| KIAA0090 | 23065  | C230096C10Rik | 230866    | X |
| KIAA0195 | 9772   | 2310067B10Rik | 71947     | X |
| KIAA0701 | 23074  | Uhrf1bp1l     | 75089     | X |
| KIAA1128 | 54462  | Gcap14        | 72972     | X |
| KIAA1333 | 55632  | G2e3          | 217558    | X |
| KIAA1344 | 57544  | Txndc16       | 70561     | X |
| KIF5A    | 3798   | Kif5a         | 16572     | X |
| KIR3DL2  | 3812   | Kir3dl2       | 245615    | X |
| KLHL2    | 11275  | Klhl2         | 77113     | X |
| KLRB1    | 3820   | Klrb1         | 100043861 | X |
| KLRC1    | 3821   | Klrc1         | 16641     | X |
| KLRC2    | 3822   | Klrc2         | 16642     | X |
| KLRC3    | 3823   | Klrc3         | 58179     | X |
| KLRG1    | 10219  | Klrg1         | 50928     | X |
| KMO      | 8564   | Kmo           | 98256     | X |
| KPNA1    | 3836   | Kpna1         | 16646     | X |
| KPNA2    | 3838   | Kpna2         | 16647     | X |
| KPNA3    | 3839   | Kpna3         | 16648     | X |
| KRAS     | 3845   | Kras          | 16653     | X |
| KRT1     | 3848   | Krt1          | 16678     | X |
| KRT19    | 3880   | Krt19         | 16669     | X |
| KRT8     | 3856   | Krt8          | 16691     | X |
| KSR1     | 8844   | Ksr1          | 16706     | X |
| KTN1     | 3895   | Ktn1          | 16709     | X |
| L1CAM    | 3897   | L1cam         | 16728     | X |
| L1TD1    | 54596  | L1td1         | 381591    | X |
| L2HGDH   | 79944  | L2hgdh        | 217666    | X |
| LAX1     | 54900  | Lax1          | 240754    | X |
| LAYN     | 143903 | Layn          | 244864    | X |
| LCK      | 3932   | Lck           | 16818     | X |
| LCN10    | 414332 | Lcn10         | 332578    | X |
| LCP1     | 3936   | Lcp1          | 18826     | X |
| LDLR     | 3949   | Ldlr          | 16835     | X |

|           |        |          |        |   |
|-----------|--------|----------|--------|---|
| LDLRAP1   | 26119  | Ldlrap1  | 100017 | X |
| LENG8     | 114823 | Leng8    | 232798 | X |
| LENG9     | 94059  | Leng9    | 243813 | X |
| LEP       | 3952   | Lep      | 16846  | X |
| LEPR      | 3953   | Lepr     | 16847  | X |
| LEPREL1   | 55214  | Leprel1  | 210530 | X |
| LGALS4    | 3960   | Lgals4   | 16855  | X |
| LGALS9    | 3965   | Lgals9   | 16859  | X |
| LGI1      | 9211   | Lgi1     | 56839  | X |
| LGR6      | 59352  | Lgr6     | 329252 | X |
| LGTN      | 1939   | Eif2d    | 16865  | X |
| LILRA5    | 353514 | Lilra5   | 232801 | X |
| LMAN1     | 3998   | Lman1    | 70361  | X |
| LMNA      | 4000   | Lmna     | 16905  | X |
| LMNB2     | 84823  | Lmnb2    | 16907  | X |
| LOC342897 | 342897 | Nccrp1   | 233038 | X |
| LOC389465 | 6741   | Ssb      | 20823  | X |
| LRP10     | 26020  | Lrp10    | 65107  | X |
| LRP3      | 4037   | Lrp3     | 435965 | X |
| LRRC40    | 55631  | Lrrc40   | 67144  | X |
| LSAMP     | 4045   | Lsamp    | 268890 | X |
| LSM4      | 25804  | Lsm4     | 50783  | X |
| LSM6      | 11157  | Lsm6     | 78651  | X |
| LTBR      | 4055   | Ltbr     | 17000  | X |
| LY75      | 4065   | Ly75     | 17076  | X |
| LY96      | 23643  | Ly96     | 17087  | X |
| LYAR      | 55646  | Lyar     | 17089  | X |
| LYRM1     | 57149  | Lyrm1    | 73919  | X |
| LYRM2     | 57226  | Lyrm2    | 108755 | X |
| LYRM4     | 57128  | Lyrm4    | 380840 | X |
| LYRM5     | 144363 | Lyrm5    | 67636  | X |
| LYRM7     | 90624  | Lyrm7    | 75530  | X |
| MAGOHB    | 55110  | Magohb   | 66441  | X |
| MAGT1     | 84061  | Magt1    | 67075  | X |
| MAP3K7IP1 | 10454  | Tab1     | 66513  | X |
| MAPK15    | 225689 | Mapk15   | 332110 | X |
| MAPRE1    | 22919  | Mapre1   | 13589  | X |
| MARVELD2  | 153562 | Marveld2 | 218518 | X |
| MBNL1     | 4154   | Mbnl1    | 56758  | X |
| MCF2      | 4168   | Mcf2     | 109904 | X |
| MCTS1     | 28985  | Mcts1    | 68995  | X |
| MDK       | 4192   | Mdk      | 17242  | X |
| ME2       | 4200   | Me2      | 107029 | X |
| MECR      | 51102  | Mecr     | 26922  | X |
| MED30     | 90390  | Med30    | 69790  | X |
| METRNL    | 79006  | Metrn    | 70083  | X |
| MFSD1     | 64747  | Mfsd1    | 66868  | X |
| MGAT4B    | 11282  | Mgat4b   | 103534 | X |
| MGC19604  | 112812 | Fdx1l    | 68165  | X |
| MGC4172   | 79154  | Dhrs11   | 192970 | X |
| MICALL1   | 85377  | Micall1  | 27008  | X |
| MICB      | 4277   | Mill2    | 243864 | X |
| MIER3     | 166968 | Mier3    | 218613 | X |
| MIST      | 116449 | Clnk     | 27278  | X |
| MKRN1     | 23608  | Mkrn1    | 54484  | X |

|         |        |         |        |   |
|---------|--------|---------|--------|---|
| MLC1    | 23209  | Mlc1    | 170790 | X |
| MLF1IP  | 79682  | Mlf1ip  | 71876  | X |
| MMD     | 23531  | Mmd     | 67468  | X |
| MMD2    | 221938 | Mmd2    | 75104  | X |
| MOBP    | 4336   | Mobp    | 17433  | X |
| MPL     | 4352   | Mpl     | 17480  | X |
| MPPED2  | 744    | Mpped2  | 77015  | X |
| MR1     | 3140   | Mr1     | 15064  | X |
| MRPL12  | 6182   | Mrpl12  | 56282  | X |
| MRPL37  | 51253  | Mrpl37  | 56280  | X |
| MRPS16  | 51021  | Mrps16  | 66242  | X |
| MS4A10  | 341116 | Ms4a10  | 69826  | X |
| MS4A5   | 64232  | Ms4a5   | 269063 | X |
| MS4A6A  | 64231  | Ms4a6d  | 68774  | X |
| MS4A8B  | 83661  | Ms4a8a  | 64381  | X |
| MSI1    | 4440   | Msi1    | 17690  | X |
| MSN     | 4478   | Msn     | 17698  | X |
| MSR1    | 4481   | Msr1    | 20288  | X |
| MSRB3   | 253827 | Msrb3   | 320183 | X |
| MT3     | 4504   | Mt3     | 17751  | X |
| MTO1    | 25821  | Mto1    | 68291  | X |
| MTSS1   | 9788   | Mtss1   | 211401 | X |
| MTUS1   | 57509  | Mtus1   | 102103 | X |
| MTX1    | 4580   | Mtx1    | 17827  | X |
| MYO18A  | 399687 | Myo18a  | 360013 | X |
| NARF    | 26502  | Narf    | 67608  | X |
| NCBP2   | 22916  | Ncbp2   | 68092  | X |
| NCF4    | 4689   | Ncf4    | 17972  | X |
| NCL     | 4691   | Ncl     | 17975  | X |
| NCLN    | 56926  | Ncln    | 103425 | X |
| NCOA7   | 135112 | Ncoa7   | 211329 | X |
| NCOR2   | 9612   | Ncor2   | 20602  | X |
| NCR1    | 9437   | Ncr1    | 17086  | X |
| NCR3    | 259197 | Ncr3-ps | 667612 | X |
| NDST4   | 64579  | Ndst4   | 64580  | X |
| NDUFA12 | 55967  | Ndufa12 | 66414  | X |
| NDUFA13 | 51079  | Ndufa13 | 67184  | X |
| NDUFAF2 | 91942  | Ndufaf2 | 75597  | X |
| NDUFB2  | 4708   | Ndufb2  | 68198  | X |
| NDUFS1  | 4719   | Ndufs1  | 227197 | X |
| NEIL2   | 252969 | Neil2   | 382913 | X |
| NETO1   | 81832  | Neto1   | 246317 | X |
| NEURL   | 9148   | Neurl1a | 18011  | X |
| NEUROG1 | 4762   | Neurog1 | 18014  | X |
| NGB     | 58157  | Ngb     | 64242  | X |
| NGF     | 4803   | Ngf     | 18049  | X |
| NGFR    | 4804   | Ngfr    | 18053  | X |
| NGFRAP1 | 27018  | Ngfrap1 | 12070  | X |
| NHLRC2  | 374354 | Nhlrc2  | 66866  | X |
| NODAL   | 4838   | Nodal   | 18119  | X |
| NOG     | 9241   | Nog     | 18121  | X |
| NOLA2   | 55651  | Nhp2    | 52530  | X |
| N-PAC   | 84656  | Glyr1   | 74022  | X |
| NPM1    | 4869   | Npm1    | 18148  | X |
| NPSR1   | 387129 | Npsr1   | 319239 | X |

|          |        |            |           |   |
|----------|--------|------------|-----------|---|
| NPTN     | 27020  | Nptn       | 20320     | X |
| NPTXR    | 23467  | Nptxr      | 73340     | X |
| NR2F2    | 7026   | Nr2f2      | 11819     | X |
| NRAS     | 4893   | Nras       | 18176     | X |
| NRBF2    | 29982  | Nrbf2      | 641340    | X |
| NRG1     | 3084   | Nrg1       | 211323    | X |
| NRG2     | 9542   | Nrg2       | 100042150 | X |
| NRIP2    | 83714  | Nrip2      | 60345     | X |
| NRP1     | 8829   | Nrp1       | 18186     | X |
| NRP2     | 8828   | Nrp2       | 18187     | X |
| NT5C2    | 22978  | Nt5c2      | 76952     | X |
| NTF3     | 4908   | Ntf3       | 18205     | X |
| NTF4     | 4909   | Ntf5       | 78405     | X |
| NUDT13   | 25961  | Nudt13     | 67725     | X |
| NUMBL    | 9253   | Numbl      | 18223     | X |
| NUP205   | 23165  | Nup205     | 70699     | X |
| NUP35    | 129401 | Nup35      | 69482     | X |
| NUP85    | 79902  | Nup85      | 445007    | X |
| NXN      | 64359  | Nxn        | 18230     | X |
| NXNL1    | 115861 | Nxn1       | 234404    | X |
| OGFOD2   | 79676  | Ogfod2     | 66627     | X |
| OGFR     | 11054  | Ogfr       | 72075     | X |
| OMA1     | 115209 | Oma1       | 67013     | X |
| OPRS1    | 10280  | Sigmar1    | 18391     | X |
| OR10R2   | 343406 | Olfr1406   | 258758    | X |
| OR10S1   | 219873 | Olfr982    | 258853    | X |
| OR10X1   | 128367 | Olfr417    | 258238    | X |
| OR13A1   | 79290  | Olfr211    | 258914    | X |
| OR13D1   | 286365 | Olfr270    | 258600    | X |
| OR1B1    | 347169 | Olfr362    | 259053    | X |
| OR1S1    | 219959 | Olfr1496   | 258991    | X |
| OR2C3    | 81472  | Olfr225    | 257886    | X |
| OR2D3    | 120775 | Olfr707    | 194433    | X |
| OR2K2    | 26248  | Olfr267    | 258922    | X |
| OR2T1    | 26696  | Olfr31     | 18330     | X |
| OR2T4    | 127074 | Olfr329-ps | 259148    | X |
| OR4C3    | 256144 | Olfr140    | 57272     | X |
| OR4D1    | 26689  | Olfr464    | 258407    | X |
| OR4D11   | 219986 | Olfr1423   | 258675    | X |
| OR51D1   | 390038 | Olfr557    | 258358    | X |
| OR51V1   | 283111 | Olfr624    | 258189    | X |
| OR52B2   | 255725 | Olfr691    | 259063    | X |
| OR52B6   | 340980 | Olfr618    | 259049    | X |
| OR52L1   | 338751 | Olfr685    | 258160    | X |
| OR56B1   | 387748 | Olfr657    | 258309    | X |
| OR5C1    | 392391 | Olfr368    | 258371    | X |
| OR5M1    | 390168 | Olfr1023   | 258580    | X |
| OR5M10   | 390167 | Olfr1022   | 258582    | X |
| OR8G5    | 219865 | Olfr935    | 258741    | X |
| OR9Q2    | 219957 | Olfr1497   | 258736    | X |
| ORM2     | 5005   | Orm2       | 18406     | X |
| OSCAR    | 126014 | Oscar      | 232790    | X |
| OSMR     | 9180   | Osmr       | 18414     | X |
| P4HA3    | 283208 | P4ha3      | 320452    | X |
| PAEP     | 5047   | Paep       | 110645    | X |
| PAFAH1B1 | 5048   | Pafah1b1   | 18472     | X |
| PAN2     | 9924   | Pan2       | 103135    | X |
| PAQR5    | 54852  | Paqr5      | 74090     | X |

|          |        |          |        |   |
|----------|--------|----------|--------|---|
| PAQR6    | 79957  | Paqr6    | 68957  | X |
| PCDH1    | 5097   | Pcdh1    | 75599  | X |
| PCDHGA8  | 9708   | Pcdhga8  | 93716  | X |
| PDAP1    | 11333  | Pdap1    | 231887 | X |
| PDC      | 5132   | Pdc      | 20028  | X |
| PDCD1LG2 | 80380  | Pdcd1lg2 | 58205  | X |
| PDCL     | 5082   | Pdcl     | 67466  | X |
| PDE5A    | 8654   | Pde5a    | 242202 | X |
| PDGFD    | 80310  | Pdgfd    | 71785  | X |
| PDILT    | 204474 | Pdilt    | 71830  | X |
| PDZK1    | 5174   | Pdzk1    | 59020  | X |
| PEA15    | 8682   | Pea15a   | 18611  | X |
| PECAM1   | 5175   | Pecam1   | 18613  | X |
| PFDN6    | 10471  | H2-Ke2   | 14976  | X |
| PHKG1    | 5260   | Phkg1    | 18682  | X |
| PIAS1    | 8554   | Pias1    | 56469  | X |
| PIB5PA   | 27124  | Inpp5j   | 170835 | X |
| PIGX     | 54965  | Pigx     | 72084  | X |
| PILRA    | 29992  | Pilra    | 231805 | X |
| PITPNA   | 5306   | Pitpna   | 18738  | X |
| PITPNM2  | 57605  | Pitpnm2  | 19679  | X |
| PITPNM3  | 83394  | Pitpnm3  | 327958 | X |
| PKD2L1   | 9033   | Pkd2l1   | 329064 | X |
| PLA2R1   | 22925  | Pla2r1   | 18779  | X |
| PLCL1    | 5334   | Plcl1    | 227120 | X |
| PLG      | 5340   | Plg      | 18815  | X |
| PLK1     | 5347   | Plk1     | 18817  | X |
| PLOD1    | 5351   | Plod1    | 18822  | X |
| PLOD3    | 8985   | Plod3    | 26433  | X |
| PLXDC1   | 57125  | Plxdc1   | 72324  | X |
| PLXDC2   | 84898  | Plxdc2   | 67448  | X |
| PLXNA1   | 5361   | Plxna1   | 18844  | X |
| PLXND1   | 23129  | Plxnd1   | 67784  | X |
| PNN      | 5411   | Pnn      | 18949  | X |
| PNRC1    | 10957  | Pnrc1    | 108767 | X |
| PNRC2    | 55629  | Pnrc2    | 52830  | X |
| POFUT1   | 23509  | Pofut1   | 140484 | X |
| POLA1    | 5422   | Pola1    | 18968  | X |
| POLG     | 5428   | Polg     | 18975  | X |
| POLR2I   | 5438   | Polr2i   | 69920  | X |
| POM121   | 9883   | Pom121   | 107939 | X |
| PPP2R2D  | 55844  | Ppp2r2d  | 52432  | X |
| PPP3R2   | 5535   | Ppp3r2   | 19059  | X |
| PPRC1    | 23082  | Pprc1    | 226169 | X |
| PRDX2    | 7001   | Prdx2    | 21672  | X |
| PRIM2    | 5558   | Prim2    | 19076  | X |
| PRKCZ    | 5590   | Prkcz    | 18762  | X |
| PRKD3    | 23683  | Prkd3    | 75292  | X |
| PROCR    | 10544  | Procr    | 19124  | X |
| PROM1    | 8842   | Prom1    | 19126  | X |
| PROS1    | 5627   | Pros1    | 19128  | X |
| PRPF18   | 8559   | Prpf18   | 67229  | X |
| PSMA2    | 5683   | Psma2    | 19166  | X |
| PSMB5    | 5693   | Psmb5    | 19173  | X |
| PSMD1    | 5707   | Psm1     | 70247  | X |
| PSMD11   | 5717   | Psm11    | 69077  | X |
| PSMD12   | 5718   | Psm12    | 66997  | X |
| PSMD13   | 5719   | Psm13    | 23997  | X |
| PSMD3    | 5709   | Psm3     | 22123  | X |
| PSMD4    | 5710   | Psm4     | 19185  | X |
| PSMD6    | 9861   | Psm6     | 66413  | X |
| PSME1    | 5720   | Psme1    | 19186  | X |
| PSME3    | 10197  | Psme3    | 19192  | X |



|              |        |         |           |   |
|--------------|--------|---------|-----------|---|
| PTCRA        | 171558 | Ptcra   | 19208     | X |
| PTDSR        | 23210  | Jmid6   | 107817    | X |
| PTGFRN       | 5738   | Ptgfrn  | 19221     | X |
| PTPRM        | 5797   | Ptprm   | 19274     | X |
| PVALB        | 5816   | Pvalb   | 19293     | X |
| PVR          | 5817   | Pvr     | 52118     | X |
| PVRL1        | 5818   | Pvrl1   | 58235     | X |
| PVRL2        | 5819   | Pvrl2   | 19294     | X |
| PYCARD       | 29108  | Pycard  | 66824     | X |
| PYROXD1      | 79912  | Pyroxd1 | 232491    | X |
| QSOX1        | 5768   | Qsox1   | 104009    | X |
| QSOX2        | 169714 | Qsox2   | 227638    | X |
| RAB33A       | 9363   | Rab33a  | 19337     | X |
| RAB43        | 339122 | Rab43   | 69834     | X |
| RAC1         | 5879   | Rac1    | 19353     | X |
| RAMP2        | 10266  | Ramp2   | 54409     | X |
| RARRES1      | 5918   | Rarres1 | 109222    | X |
| RARRES2      | 5919   | Rarres2 | 71660     | X |
| RASA2        | 5922   | Rasa2   | 114713    | X |
| RASA4        | 10156  | Rasa4   | 54153     | X |
| RBMX         | 27316  | Rbmx    | 19655     | X |
| RBMXL1       | 494115 | Rbmxl1  | 19656     | X |
| RBP1         | 5947   | Rbp1    | 19659     | X |
| RBP2         | 5948   | Rbp2    | 19660     | X |
| RDX          | 5962   | Rdx     | 19684     | X |
| REEP4        | 80346  | Reep4   | 72549     | X |
| REG1A        | 5967   | Reg1    | 19692     | X |
| RETSAT       | 54884  | Retsat  | 67442     | X |
| RFC3         | 5983   | Rfc3    | 69263     | X |
| RFESD        | 317671 | Rfesd   | 218341    | X |
| RFFL         | 117584 | Rffl    | 67338     | X |
| RHBDF1       | 64285  | Rhbdf1  | 13650     | X |
| RHBG         | 57127  | Rhbg    | 58176     | X |
| RHCG         | 51458  | Rhcg    | 56315     | X |
| RHO          | 6010   | Rho     | 212541    | X |
| RIMS3        | 9783   | Rims3   | 242662    | X |
| RIN2         | 54453  | Rin2    | 74030     | X |
| RNF135       | 84282  | Rnf135  | 71956     | X |
| RNF144B      | 255488 | Rnf144b | 218215    | X |
| RNFT2        | 84900  | Rnft2   | 269695    | X |
| ROBO1        | 6091   | Robo1   | 19876     | X |
| ROBO3        | 64221  | Robo3   | 19649     | X |
| ROBO4        | 54538  | Robo4   | 74144     | X |
| ROD1         | 9991   | Rod1    | 230257    | X |
| ROPN1        | 54763  | Ropn1   | 76378     | X |
| RP11-45J16.2 | 116123 | Fmo9    | 240894    | X |
| RPL5         | 6125   | Rpl5    | 100503670 | X |
| RPN1         | 6184   | Rpn1    | 103963    | X |
| RPS18        | 6222   | Rps18   | 20084     | X |
| RPS6         | 6194   | Rps6    | 20104     | X |
| RRAGD        | 58528  | Rragd   | 52187     | X |
| RTN4R        | 65078  | Rtn4r   | 65079     | X |
| RTN4RL1      | 146760 | Rtn4rl1 | 237847    | X |
| RWDD3        | 25950  | Rwdd3   | 66568     | X |
| S100A14      | 57402  | S100a14 | 66166     | X |
| SALL1        | 6299   | Sall1   | 58198     | X |
| SASH3        | 54440  | Sash3   | 74131     | X |
| SBN01        | 55206  | Sbno1   | 243272    | X |
| SCARA3       | 51435  | Scara3  | 219151    | X |
| SCARF1       | 8578   | Scarf1  | 380713    | X |
| SCYL1        | 57410  | Scyl1   | 78891     | X |
| SDC1         | 6382   | Sdc1    | 20969     | X |
| SEC13L1      | 6396   | Sec13   | 110379    | X |

|            |        |            |        |   |
|------------|--------|------------|--------|---|
| SEC14L3    | 266629 | Sec14l3    | 380683 | X |
| SEC22A     | 26984  | Sec22a     | 317717 | X |
| SEC22C     | 9117   | Sec22c     | 215474 | X |
| SEC23A     | 10484  | Sec23a     | 20334  | X |
| SEC23IP    | 11196  | Sec23ip    | 207352 | X |
| SELL       | 6402   | Sell       | 20343  | X |
| SELS       | 55829  | H47        | 109815 | X |
| SEMA3C     | 10512  | Sema3c     | 20348  | X |
| SEMA3D     | 223117 | Sema3d     | 108151 | X |
| SEMA4C     | 54910  | Sema4c     | 20353  | X |
| SEMA4D     | 10507  | Sema4d     | 20354  | X |
| SEMA5A     | 9037   | Sema5a     | 20356  | X |
| SEMA5B     | 54437  | Sema5b     | 20357  | X |
| SEMA6B     | 10501  | Sema6b     | 20359  | X |
| SEMA6D     | 80031  | Sema6d     | 214968 | X |
| SENP5      | 205564 | Senp5      | 320213 | X |
| SENP7      | 57337  | Senp7      | 66315  | X |
| SEPT3      | 55964  | Sept3      | 24050  | X |
| SERGEF     | 26297  | Sergef     | 27414  | X |
| SET        | 6418   | Set        | 56086  | X |
| SEZ6L2     | 26470  | Sez6l2     | 233878 | X |
| SFRP1      | 6422   | Sfrp1      | 20377  | X |
| SFRS4      | 6429   | Srsf4      | 57317  | X |
| SFTPA1     | 6435   | Sftpa1     | 20387  | X |
| SGCB       | 6443   | Sgcb       | 24051  | X |
| SH3BP5L    | 80851  | Sh3bp5l    | 79566  | X |
| SH3TC1     | 54436  | Sh3tc1     | 231147 | X |
| SHMT1      | 6470   | Shmt1      | 20425  | X |
| SIAH1      | 6477   | Siah1a     | 20437  | X |
| SIGLEC5    | 8778   | Siglec5    | 233186 | X |
| SIGLEC8    | 27181  | Siglece    | 83382  | X |
| SKAP1      | 8631   | Skap1      | 78473  | X |
| SLAMF9     | 89886  | Slamf9     | 98365  | X |
| SLC22A3    | 6581   | Slc22a3    | 20519  | X |
| SLC35A1    | 10559  | Slc35a1    | 24060  | X |
| SMC1A      | 8243   | Smc1a      | 24061  | X |
| SMC2       | 10592  | Smc2       | 14211  | X |
| SNAPIN     | 23557  | Snapin     | 20615  | X |
| SNED1      | 25992  | Sned1      | 208777 | X |
| SNRPA1     | 6627   | Snrpa1     | 68981  | X |
| SNRPB      | 6628   | Snrpb      | 20638  | X |
| SNRPC      | 6631   | Snrpc      | 20630  | X |
| SNX15      | 29907  | Snx15      | 69024  | X |
| SNX2       | 6643   | Snx2       | 67804  | X |
| SORCS2     | 57537  | Sorcs2     | 81840  | X |
| SORCS3     | 22986  | Sorcs3     | 66673  | X |
| SORL1      | 6653   | Sorl1      | 20660  | X |
| SOX30      | 11063  | Sox30      | 214105 | X |
| SPIN2      | 54466  | Spin2      | 278240 | X |
| SPINK1     | 6690   | Spink3     | 20730  | X |
| SPINK4     | 27290  | Spink4     | 20731  | X |
| SPNS1      | 83985  | Spns1      | 73658  | X |
| SPRY3      | 10251  | Spry3      | 236576 | X |
| SRGAP3     | 9901   | Srgap3     | 259302 | X |
| SRPR       | 6734   | Srpr       | 67398  | X |
| SRPRB      | 58477  | Srprb      | 20818  | X |
| SSR2       | 6746   | Ssr2       | 66256  | X |
| SSR3       | 6747   | Ssr3       | 67437  | X |
| ST13       | 6767   | St13       | 70356  | X |
| ST6GALNAC6 | 30815  | St6galnac6 | 50935  | X |
| ST8SIA1    | 6489   | St8sia1    | 20449  | X |
| ST8SIA2    | 8128   | St8sia2    | 20450  | X |
| STAP1      | 26228  | Stap1      | 56792  | X |

|          |        |          |        |   |
|----------|--------|----------|--------|---|
| STC2     | 8614   | Stc2     | 20856  | X |
| STEAP2   | 261729 | Steap2   | 74051  | X |
| STEAP3   | 55240  | Steap3   | 68428  | X |
| STEAP4   | 79689  | Steap4   | 117167 | X |
| STIL     | 6491   | Stil     | 20460  | X |
| STK16    | 8576   | Stk16    | 20872  | X |
| STON2    | 85439  | Ston2    | 108800 | X |
| STRN4    | 29888  | Strn4    | 97387  | X |
| STX11    | 8676   | Stx11    | 74732  | X |
| STX12    | 23673  | Stx12    | 100226 | X |
| STX19    | 415117 | Stx19    | 68159  | X |
| STX1A    | 6804   | Stx1a    | 20907  | X |
| STX1B    | 112755 | Stx1b    | 56216  | X |
| STX2     | 2054   | Stx2     | 13852  | X |
| STX3     | 6809   | Stx3     | 20908  | X |
| STX4     | 6810   | Stx4a    | 20909  | X |
| STX6     | 10228  | Stx6     | 58244  | X |
| STX7     | 8417   | Stx7     | 53331  | X |
| STX8     | 9482   | Stx8     | 55943  | X |
| STXBP2   | 6813   | Stxbp2   | 20911  | X |
| SUPV3L1  | 6832   | Supv3l1  | 338359 | X |
| SURF1    | 6834   | Surf1    | 20930  | X |
| SV2A     | 9900   | Sv2a     | 64051  | X |
| SYNE2    | 23224  | Syne2    | 319565 | X |
| SYTL2    | 54843  | Sytl2    | 83671  | X |
| TAPBPL   | 55080  | Tapbpl   | 213233 | X |
| TAS2R38  | 5726   | Tas2r138 | 387513 | X |
| TAS2R42  | 353164 | Tas2r131 | 387356 | X |
| TAS2R49  | 259295 | Tas2r120 | 387348 | X |
| TBC1D16  | 125058 | Tbc1d16  | 207592 | X |
| TCEA3    | 6920   | Tcea3    | 21401  | X |
| TDGF1    | 6997   | Tdgf1    | 21667  | X |
| TDO2     | 6999   | Tdo2     | 56720  | X |
| TEX101   | 83639  | Tex101   | 56746  | X |
| TEX14    | 56155  | Tex14    | 83560  | X |
| TFR2     | 7036   | Tfr2     | 50765  | X |
| TGFBI    | 7045   | Tgfbi    | 21810  | X |
| TGM1     | 7051   | Tgm1     | 21816  | X |
| TGM6     | 343641 | Tgm6     | 241636 | X |
| THADA    | 63892  | Thada    | 240174 | X |
| THPO     | 7066   | Thpo     | 21832  | X |
| TIMM50   | 92609  | Timm50   | 66525  | X |
| TIMM8A   | 1678   | Timm8a1  | 30058  | X |
| TIPARP   | 25976  | Tiparp   | 99929  | X |
| TLR3     | 7098   | Tlr3     | 142980 | X |
| TLR4     | 7099   | Tlr4     | 21898  | X |
| TLR9     | 54106  | Tlr9     | 81897  | X |
| TM7SF2   | 7108   | Tm7sf2   | 73166  | X |
| TM9SF1   | 10548  | Tm9sf1   | 74140  | X |
| TM9SF4   | 9777   | Tm9sf4   | 99237  | X |
| TMCO1    | 54499  | Tmco1    | 68944  | X |
| TMED1    | 11018  | Tmed1    | 17083  | X |
| TMED2    | 10959  | Tmed2    | 56334  | X |
| TMED3    | 23423  | Tmed3    | 66111  | X |
| TMED5    | 50999  | Tmed5    | 73130  | X |
| TMED6    | 146456 | Tmed6    | 66269  | X |
| TMED7    | 51014  | Tmed7    | 66676  | X |
| TMED8    | 283578 | Tmed8    | 382620 | X |
| TMEM1    | 7109   | Trappc10 | 216131 | X |
| TMEM48   | 55706  | Tmem48   | 72787  | X |
| TMEM9    | 252839 | Tmem9    | 66241  | X |
| TNFAIP3  | 7128   | Tnfaip3  | 21929  | X |
| TNFRSF18 | 8784   | Tnfrsf18 | 21936  | X |

|          |        |          |        |   |
|----------|--------|----------|--------|---|
| TNFRSF1A | 7132   | Tnfrsf1a | 21937  | X |
| TNFRSF21 | 27242  | Tnfrsf21 | 94185  | X |
| TNFRSF25 | 8718   | Tnfrsf25 | 85030  | X |
| TNFSF12  | 8742   | Tnfsf12  | 21944  | X |
| TNFSF13B | 10673  | Tnfsf13b | 24099  | X |
| TNFSF14  | 8740   | Tnfsf14  | 50930  | X |
| TNFSF15  | 9966   | Tnfsf15  | 326623 | X |
| TNFSF4   | 7292   | Tnfsf4   | 22164  | X |
| TNFSF8   | 944    | Tnfsf8   | 21949  | X |
| TNXB     | 7148   | Tnxb     | 81877  | X |
| TOLLIP   | 54472  | Tollip   | 54473  | X |
| TOM1L2   | 146691 | Tom1l2   | 216810 | X |
| TOMM22   | 56993  | Tomm22   | 223696 | X |
| TP53BP2  | 7159   | Trp53bp2 | 209456 | X |
| TPI1     | 7167   | Tpi1     | 21991  | X |
| TPM1     | 7168   | Tpm1     | 22003  | X |
| TPM2     | 7169   | Tpm2     | 22004  | X |
| TPR      | 7175   | Tpr      | 108989 | X |
| TPRKB    | 51002  | Tprkb    | 69786  | X |
| TRAF1    | 7185   | Traf1    | 22029  | X |
| TRAF3IP1 | 26146  | Traf3ip1 | 74019  | X |
| TRAM1    | 23471  | Tram1    | 72265  | X |
| TRAPPC1  | 58485  | Trappc1  | 245828 | X |
| TRAPPC2L | 51693  | Trappc2l | 59005  | X |
| TRAT1    | 50852  | Trat1    | 77647  | X |
| TREML2   | 79865  | Trem12   | 328833 | X |
| TREML4   | 285852 | Trem14   | 224840 | X |
| TRIB1    | 10221  | Trib1    | 211770 | X |
| TRIB3    | 57761  | Trib3    | 228775 | X |
| TRIM14   | 9830   | Trim14   | 74735  | X |
| TRIM59   | 286827 | Trim59   | 66949  | X |
| TROAP    | 10024  | Troap    | 78733  | X |
| TSEN34   | 79042  | Tsen34   | 66078  | X |
| TSPO     | 706    | Tspo     | 12257  | X |
| TSTA3    | 7264   | Tsta3    | 22122  | X |
| TTR      | 7276   | Ttr      | 22139  | X |
| TUBA1C   | 84790  | Tuba1c   | 22146  | X |
| TUBA4A   | 7277   | Tuba4a   | 22145  | X |
| TUBG1    | 7283   | Tubg1    | 103733 | X |
| TXN      | 7295   | Txn1     | 22166  | X |
| TXN2     | 25828  | Txn2     | 56551  | X |
| TXNDC13  | 56255  | Tmx4     | 52837  | X |
| TXNDC14  | 51075  | Tmx2     | 66958  | X |
| TXNDC15  | 79770  | Txndc15  | 69672  | X |
| TXNDC17  | 84817  | Txndc17  | 52700  | X |
| TXNDC3   | 51314  | Nme8     | 73412  | X |
| TXNDC4   | 23071  | Erp44    | 76299  | X |
| TXNDC5   | 81567  | Txndc5   | 105245 | X |
| TXNDC6   | 347736 | NME9     | 623534 | X |
| TXNDC9   | 10190  | Txndc9   | 98258  | X |
| TXNL1    | 9352   | Txn1     | 53382  | X |
| TXNL4A   | 10907  | Txn14a   | 27366  | X |
| TYMP     | 1890   | Tymp     | 72962  | X |
| U2AF1    | 7307   | U2af1    | 108121 | X |
| UAP1     | 6675   | Uap1     | 107652 | X |
| UBE3C    | 9690   | Ube3c    | 100763 | X |
| UCP1     | 7350   | Ucp1     | 22227  | X |
| UCP2     | 7351   | Ucp2     | 22228  | X |
| UCP3     | 7352   | Ucp3     | 22229  | X |
| UHRF1BP1 | 54887  | Uhrf1bp1 | 224648 | X |
| UIMC1    | 51720  | Uimc1    | 20184  | X |
| ULBP1    | 80329  | Ulb1     | 77777  | X |
| UNC5D    | 137970 | Unc5d    | 210801 | X |

|               |        |         |        |   |
|---------------|--------|---------|--------|---|
| UQCRQ         | 27089  | Uqcrq   | 22272  | X |
| USP34         | 9736   | Usp34   | 17847  | X |
| VAMP7         | 6845   | Vamp7   | 20955  | X |
| VIL2          | 7430   | Ezr     | 22350  | X |
| VPS26A        | 9559   | Vps26a  | 30930  | X |
| VPS26B        | 112936 | Vps26b  | 69091  | X |
| VPS28         | 51160  | Vps28   | 66914  | X |
| WDR44         | 54521  | Wdr44   | 72404  | X |
| WDR54         | 84058  | Wdr54   | 75659  | X |
| WDR86         | 349136 | Wdr86   | 269633 | X |
| WDR88         | 126248 | Wdr88   | 384605 | X |
| WNT5A         | 7474   | Wnt5a   | 22418  | X |
| WNT6          | 7475   | Wnt6    | 22420  | X |
| WNT7A         | 7476   | Wnt7a   | 22421  | X |
| WNT7B         | 7477   | Wnt7b   | 22422  | X |
| WSB2          | 55884  | Wsb2    | 59043  | X |
| XKR6          | 286046 | Xkr6    | 219149 | X |
| XPOT          | 11260  | Xpot    | 73192  | X |
| ZCCHC17       | 51538  | Zcchc17 | 619605 | X |
| ZEB1          | 6935   | Zeb1    | 21417  | X |
| ZIC2          | 7546   | Zic2    | 22772  | X |
| ZNF342        | 162979 | Zfp296  | 63872  | X |
| ZP2           | 7783   | Zp2     | 22787  | X |
| ZP3           | 7784   | Zp3     | 22788  | X |
| ZWILCH        | 55055  | Zwilch  | 68014  | X |
| ABCC11        | 85320  | Unknown | X      | X |
| ABCC13        | 150000 | Unknown | X      | X |
| CCL14         | 6358   | Unknown | X      | X |
| CCL15         | 6359   | Unknown | X      | X |
| CCL16         | 6360   | Unknown | X      | X |
| CCL4L1        | 9560   | Unknown | X      | X |
| CCL8          | 6355   | Unknown | X      | X |
| CD163L1       | 283316 | Unknown | X      | X |
| CD1B          | 910    | Unknown | X      | X |
| CEACAM6       | 4680   | Unknown | X      | X |
| CEACAM8       | 1088   | Unknown | X      | X |
| CHRFAM7A      | 89832  | Unknown | X      | X |
| CYP2A6        | 1548   | Unknown | X      | X |
| CYP2A7        | 1549   | Unknown | X      | X |
| CYP2D7P1      | 1564   | Unknown | X      | X |
| CYP3A4        | 1576   | Unknown | X      | X |
| CYP3A7        | 1551   | Unknown | X      | X |
| CYP4Z1        | 199974 | Unknown | X      | X |
| D2HGDH        | 257054 | Unknown | X      | X |
| DKFZP434A0131 | 54441  | Unknown | X      | X |
| DLEU1         | 10301  | Unknown | X      | X |
| EMR4          | 326342 | Unknown | X      | X |
| ERVWE1        | 30816  | Unknown | X      | X |
| FCRL4         | 83417  | Unknown | X      | X |
| FCRL5         | 83416  | Unknown | X      | X |
| GNRHR2        | 114814 | Unknown | X      | X |
| HBG2          | 3048   | Unknown | X      | X |
| HLA-DQB2      | 3120   | Unknown | X      | X |
| HLA-DRB3      | 3125   | Unknown | X      | X |
| HLA-DRB4      | 3126   | Unknown | X      | X |
| HLA-DRB5      | 3127   | Unknown | X      | X |
| HLA-G         | 3135   | Unknown | X      | X |
| HTR1E         | 3354   | Unknown | X      | X |
| HTR3C         | 170572 | Unknown | X      | X |
| IL1F7         | 27178  | Unknown | X      | X |
| IL26          | 55801  | Unknown | X      | X |
| KIR2DL1       | 3802   | Unknown | X      | X |
| KIR2DL2       | 3803   | Unknown | X      | X |

|           |        |         |   |   |
|-----------|--------|---------|---|---|
| KIR2DL3   | 3804   | Unknown | X | X |
| KIR2DS5   | 3810   | Unknown | X | X |
| KIR3DL3   | 115653 | Unknown | X | X |
| KLRC4     | 8302   | Unknown | X | X |
| KLRF1     | 51348  | Unknown | X | X |
| KPNA5     | 3841   | Unknown | X | X |
| KRTAP13-4 | 284827 | Unknown | X | X |
| LAT1-3TM  | 81893  | Unknown | X | X |
| LILRA3    | 11026  | Unknown | X | X |
| LILRA4    | 23547  | Unknown | X | X |
| LILRP2    | 79166  | Unknown | X | X |
| LOC339483 | 339483 | Unknown | X | X |
| LOC339879 | 339879 | Unknown | X | X |
| MICA      | 4276   | Unknown | X | X |
| MKRN4     | 7682   | Unknown | X | X |
| MRTO4     | 51154  | Unknown | X | X |
| MS4A6E    | 245802 | Unknown | X | X |
| MT1F      | 4494   | Unknown | X | X |
| NCF1      | 4687   | Unknown | X | X |
| NCR2      | 9436   | Unknown | X | X |
| NOTCH2NL  | 388677 | Unknown | X | X |
| OR14A16   | 284532 | Unknown | X | X |
| OR1S2     | 219958 | Unknown | X | X |
| OR2G2     | 81470  | Unknown | X | X |
| OR2G3     | 81469  | Unknown | X | X |
| OR2L3     | 391192 | Unknown | X | X |
| OR2T27    | 403239 | Unknown | X | X |
| OR2T5     | 401993 | Unknown | X | X |
| OR4K17    | 390436 | Unknown | X | X |
| OR6B3     | 150681 | Unknown | X | X |
| OR6V1     | 346517 | Unknown | X | X |
| OR8S1     | 341568 | Unknown | X | X |
| PAGE4     | 9506   | Unknown | X | X |
| PCDH11Y   | 83259  | Unknown | X | X |
| PXDNL     | 137902 | Unknown | X | X |
| RARRES3   | 5920   | Unknown | X | X |
| RBP5      | 83758  | Unknown | X | X |
| RHCE      | 6006   | Unknown | X | X |
| SIGLEC6   | 946    | Unknown | X | X |
| SIGLEC7   | 27036  | Unknown | X | X |
| TAS2R50   | 259296 | Unknown | X | X |
| TLR10     | 81793  | Unknown | X | X |
| TNFRSF6B  | 8771   | Unknown | X | X |
| TUBA3C    | 7278   | Unknown | X | X |
| UNK       | 440802 | Unknown | X | X |
| UNK       | 391661 | Unknown | X | X |
| UNK       | 401897 | Unknown | X | X |
| ZBED1     | 9189   | Unknown | X | X |
| ZNF626    | 199777 | Unknown | X | X |
