# Supplementary material
Source: PubMed Central journal article supplement (PMC3619155)
Supplement: Supp_Table9.pdf [file Supp_Table9.pdf]

**Supplementary Table S9.** List of the 13 essential gene candidates with p-value of < 0.05 for average shRNA hairpin activity differential

| Gene symbol    | RefSeq ID | TRC Clone ID   | Validated clone | NUCL  | Active duplex | H score | p-value  |
|----------------|-----------|----------------|-----------------|-------|---------------|---------|----------|
| C8G            | NM_000606 | TRCN0000057148 |                 | 2,437 | Yes           | 57      | 1.10E-03 |
|                |           | TRCN0000057151 |                 | 3,036 | Yes           |         |          |
|                |           | TRCN0000057150 |                 | 3,245 | Yes           |         |          |
|                |           | TRCN0000057152 |                 | 3,395 | Yes           |         |          |
|                |           | TRCN0000057149 |                 | 5,467 |               |         |          |
|                |           | TRCN0000174205 |                 | 5,596 |               |         |          |
| CDK10          | NM_003674 | TRCN0000000689 | Yes             | 2,375 | Yes           | 40      | 9.20E-04 |
|                |           | TRCN0000001820 |                 | 2,559 | Yes           |         |          |
|                |           | TRCN0000199963 | Yes             | 3,322 | Yes           |         |          |
|                |           | TRCN0000001822 | Yes             | 3,333 | Yes           |         |          |
|                |           | TRCN0000199577 | Yes             | 3,684 | Yes           |         |          |
|                |           | TRCN0000001821 | Yes             | 3,808 | Yes           |         |          |
|                |           | TRCN0000199232 | Yes             | 4,052 |               |         |          |
|                |           | TRCN0000001823 |                 | 4,188 |               |         |          |
|                |           | TRCN0000199908 |                 | 4,228 |               |         |          |
|                |           | TRCN0000000687 | Yes             | 4,338 |               |         |          |
|                |           | TRCN0000199289 | Yes             | 4,443 |               |         |          |
|                |           | TRCN0000000686 |                 | 4,475 |               |         |          |
|                |           | TRCN0000000685 |                 | 4,580 |               |         |          |
|                |           | TRCN0000000688 |                 | 4,957 |               |         |          |
| TRCN0000010653 |           | 6,055          |                 |       |               |         |          |
| CSNK1E         | NM_152221 | TRCN0000001837 | Yes             | 1,841 | Yes           | 32      | 4.00E-04 |
|                |           | TRCN0000009956 |                 | 2,032 | Yes           |         |          |
|                |           | TRCN0000009965 | Yes             | 2,361 | Yes           |         |          |
|                |           | TRCN0000001834 | Yes             | 2,987 | Yes           |         |          |
|                |           | TRCN0000001838 | Yes             | 3,905 | Yes           |         |          |
|                |           | TRCN0000000603 | Yes             | 3,981 | Yes           |         |          |
|                |           | TRCN0000196744 | Yes             | 4,125 |               |         |          |
|                |           | TRCN0000199466 | Yes             | 4,138 |               |         |          |
|                |           | TRCN0000001836 | Yes             | 4,377 |               |         |          |
|                |           | TRCN0000000604 | Yes             | 4,404 |               |         |          |
|                |           | TRCN0000001835 | Yes             | 4,429 |               |         |          |
|                |           | TRCN0000196988 |                 | 4,551 |               |         |          |
|                |           | TRCN0000009955 | Yes             | 5,153 |               |         |          |
|                |           | TRCN0000199668 | Yes             | 5,277 |               |         |          |
|                |           | TRCN0000000602 | Yes             | 5,316 |               |         |          |
|                |           | TRCN0000009957 | Yes             | 5,876 |               |         |          |
|                |           | TRCN0000195482 | Yes             | 6,552 |               |         |          |
|                |           | TRCN0000009966 |                 | 6,578 |               |         |          |
| TRCN0000000605 |           | 7,044          |                 |       |               |         |          |
| FMO2           | NM_001460 | TRCN0000064474 |                 | 1,893 | Yes           | 50      | 3.60E-06 |
|                |           | TRCN0000064477 |                 | 2,030 | Yes           |         |          |
|                |           | TRCN0000064473 |                 | 2,041 | Yes           |         |          |
|                |           | TRCN0000064476 |                 | 2,131 | Yes           |         |          |
|                |           | TRCN0000064475 |                 | 2,721 | Yes           |         |          |
|                |           | TRCN0000159390 |                 | 4,623 |               |         |          |
|                |           | TRCN0000158489 |                 | 4,718 |               |         |          |
|                |           | TRCN0000158985 |                 | 4,914 |               |         |          |
|                |           | TRCN0000160288 |                 | 5,014 |               |         |          |
| TRCN0000160203 |           | 5,066          |                 |       |               |         |          |
| HDAC1          | NM_004964 | TRCN0000004815 |                 | 2,430 | Yes           | 40      | 2.60E-04 |
|                |           | TRCN0000195467 | Yes             | 2,473 | Yes           |         |          |
|                |           | TRCN0000197198 | Yes             | 3,060 | Yes           |         |          |
|                |           | TRCN0000004814 | Yes             | 3,384 | Yes           |         |          |
|                |           | TRCN0000195672 | Yes             | 4,494 |               |         |          |
|                |           | TRCN0000004817 | Yes             | 5,133 |               |         |          |
|                |           | TRCN0000195103 | Yes             | 5,233 |               |         |          |
| TRCN0000004816 | Yes       | 5,340          |                 |       |               |         |          |

|                |           |                |     |       |     |    |          |
|----------------|-----------|----------------|-----|-------|-----|----|----------|
|                |           | TRCN0000196998 | Yes | 5,782 |     |    |          |
|                |           | TRCN0000004818 | Yes | 7,149 |     |    |          |
| HRAS           | NM_005343 | TRCN0000033267 |     | 2,202 | Yes | 38 | 1.80E-04 |
|                |           | TRCN0000033268 |     | 2,502 | Yes |    |          |
|                |           | TRCN0000033265 | Yes | 2,690 | Yes |    |          |
|                |           | TRCN0000018336 |     | 3,597 | Yes |    |          |
|                |           | TRCN0000033266 |     | 3,691 | Yes |    |          |
|                |           | TRCN0000040090 |     | 4,570 |     |    |          |
|                |           | TRCN0000040091 | Yes | 4,709 |     |    |          |
|                |           | TRCN0000010357 | Yes | 4,976 |     |    |          |
|                |           | TRCN0000040089 | Yes | 5,262 |     |    |          |
|                |           | TRCN0000010358 | Yes | 5,353 |     |    |          |
|                |           | TRCN0000040088 | Yes | 5,401 |     |    |          |
|                |           | TRCN0000040092 | Yes | 5,895 |     |    |          |
| TRCN0000033264 | Yes       | 7,715          |     |       |     |    |          |
| IGF2           | NM_000612 | TRCN0000062431 |     | 1,171 | Yes | 44 | 1.70E-06 |
|                |           | TRCN0000062430 |     | 1,443 | Yes |    |          |
|                |           | TRCN0000062429 |     | 1,863 | Yes |    |          |
|                |           | TRCN0000062432 |     | 2,067 | Yes |    |          |
|                |           | TRCN0000139636 |     | 5,771 |     |    |          |
|                |           | TRCN0000140979 |     | 6,418 |     |    |          |
|                |           | TRCN0000144248 |     | 6,461 |     |    |          |
|                |           | TRCN0000140389 |     | 6,673 |     |    |          |
| TRCN0000141911 |           | 7,449          |     |       |     |    |          |
| KRAS           | NM_033360 | TRCN0000033261 | Yes | 2,331 | Yes | 45 | 2.60E-04 |
|                |           | TRCN0000033263 |     | 2,637 | Yes |    |          |
|                |           | TRCN0000040152 | Yes | 2,650 | Yes |    |          |
|                |           | TRCN0000040149 | Yes | 2,962 | Yes |    |          |
|                |           | TRCN0000040151 |     | 3,843 | Yes |    |          |
|                |           | TRCN0000033260 | Yes | 5,095 |     |    |          |
|                |           | TRCN0000033259 | Yes | 5,128 |     |    |          |
|                |           | TRCN0000040148 | Yes | 5,346 |     |    |          |
|                |           | TRCN0000010369 | Yes | 6,250 |     |    |          |
| TRCN0000033262 | Yes       | 7,403          |     |       |     |    |          |
| TRCN0000018337 |           | 7,471          |     |       |     |    |          |
| LCK            | NM_005356 | TRCN0000001601 |     | 2,238 | Yes | 44 | 1.10E-02 |
|                |           | TRCN0000001598 | Yes | 2,641 | Yes |    |          |
|                |           | TRCN0000010178 |     | 2,801 | Yes |    |          |
|                |           | TRCN0000055434 |     | 3,540 | Yes |    |          |
|                |           | TRCN0000010175 |     | 4,261 |     |    |          |
|                |           | TRCN0000001600 |     | 4,283 |     |    |          |
|                |           | TRCN0000010176 |     | 4,353 |     |    |          |
|                |           | TRCN0000010177 |     | 4,459 |     |    |          |
| TRCN0000001599 |           | 4,485          |     |       |     |    |          |
| MAPK15         | NM_139021 | TRCN0000038660 |     | 2,391 | Yes | 46 | 4.60E-04 |
|                |           | TRCN0000038663 |     | 2,413 | Yes |    |          |
|                |           | TRCN0000199135 | Yes | 2,795 | Yes |    |          |
|                |           | TRCN0000199134 |     | 3,280 | Yes |    |          |
|                |           | TRCN0000199957 |     | 3,790 | Yes |    |          |
|                |           | TRCN0000002214 |     | 3,797 | Yes |    |          |
|                |           | TRCN0000002213 |     | 4,120 |     |    |          |
|                |           | TRCN0000002212 |     | 4,326 |     |    |          |
|                |           | TRCN0000038662 | Yes | 4,699 |     |    |          |
|                |           | TRCN0000199687 | Yes | 4,711 |     |    |          |
|                |           | TRCN0000199159 |     | 4,874 |     |    |          |
|                |           | TRCN0000038659 |     | 5,503 |     |    |          |
| TRCN0000038661 |           | 6,162          |     |       |     |    |          |
|                |           | TRCN0000006248 | Yes | 2,337 | Yes |    |          |
|                |           | TRCN0000121325 | Yes | 3,107 | Yes |    |          |
|                |           | TRCN0000199639 | Yes | 3,739 | Yes |    |          |
|                |           | TRCN0000199631 | Yes | 3,985 | Yes |    |          |
|                |           | TRCN0000121222 | Yes | 4,036 |     |    |          |

|                |           |                |           |                |     |    |          |
|----------------|-----------|----------------|-----------|----------------|-----|----|----------|
| PLK1           | NM_005030 | TRCN0000196379 | Yes       | 4,341          |     | 17 | 1.00E-03 |
|                |           | TRCN0000199471 |           | 4,351          |     |    |          |
|                |           | TRCN0000121323 | Yes       | 4,596          |     |    |          |
|                |           | TRCN0000006247 | Yes       | 4,598          |     |    |          |
|                |           | TRCN0000121324 | Yes       | 4,662          |     |    |          |
|                |           | TRCN0000006246 | Yes       | 4,926          |     |    |          |
|                |           | TRCN0000121073 | Yes       | 5,039          |     |    |          |
|                |           | TRCN0000199290 | Yes       | 5,069          |     |    |          |
|                |           | TRCN0000006249 |           | 5,157          |     |    |          |
|                |           | TRCN0000121074 |           | 5,265          |     |    |          |
|                |           | TRCN0000011006 | Yes       | 5,270          |     |    |          |
|                |           | TRCN0000121224 | Yes       | 5,414          |     |    |          |
|                |           | TRCN0000121322 | Yes       | 5,714          |     |    |          |
|                |           | TRCN0000121223 | Yes       | 6,470          |     |    |          |
|                |           | TRCN0000121075 | Yes       | 6,684          |     |    |          |
|                |           | TRCN0000121226 | Yes       | 6,901          |     |    |          |
|                |           | TRCN0000121326 | Yes       | 7,059          |     |    |          |
|                |           | TRCN0000121072 | Yes       | 8,835          |     |    |          |
|                |           | POLA1          | NM_016937 | TRCN0000052957 | Yes |    |          |
| TRCN0000174228 |           |                |           | 2,378          | Yes |    |          |
| TRCN0000052954 | Yes       |                |           | 3,161          | Yes |    |          |
| TRCN0000174164 |           |                |           | 3,595          | Yes |    |          |
| TRCN0000052956 | Yes       |                |           | 5,921          |     |    |          |
| TRCN0000052953 | Yes       |                |           | 5,956          |     |    |          |
| TRCN0000052955 | Yes       | 7,228          |           |                |     |    |          |
| TRIB3          | NM_021158 | TRCN0000037406 |           | 2,418          | Yes | 50 | 1.20E-03 |
|                |           | TRCN0000037407 |           | 3,060          | Yes |    |          |
|                |           | TRCN0000199844 | Yes       | 3,317          | Yes |    |          |
|                |           | TRCN0000199684 | Yes       | 3,616          | Yes |    |          |
|                |           | TRCN0000197212 | Yes       | 3,634          | Yes |    |          |
|                |           | TRCN0000037405 |           | 4,250          |     |    |          |
|                |           | TRCN0000196756 | Yes       | 4,298          |     |    |          |
|                |           | TRCN0000037404 | Yes       | 4,400          |     |    |          |
|                |           | TRCN0000199148 | Yes       | 5,031          |     |    |          |
| TRCN0000037408 | Yes       | 5,052          |           |                |     |    |          |
