# Supplementary material
Source: PubMed Central journal article supplement (PMC3619155)
Supplement: Supp_Table10.pdf [file Supp_Table10.pdf]

**Supplementary Table S10.** List of the seven published studies used in the performance evaluation of 9 known essential genes using shRNA libraries. KRAS-mu indicates cell lines harboring a KRAS mutation; KRAS-wt indicates cell lines with wild type KRAS

| Study                       | Library                                                                                                                                                       | Library coverage                  | # of hits                  | Cell lines screened                                                                                                                           | Row #                      | H score |                                                                                                                                                                                                                                            |    |   |
|-----------------------------|---------------------------------------------------------------------------------------------------------------------------------------------------------------|-----------------------------------|----------------------------|-----------------------------------------------------------------------------------------------------------------------------------------------|----------------------------|---------|--------------------------------------------------------------------------------------------------------------------------------------------------------------------------------------------------------------------------------------------|----|---|
| This study                  | TRC, arrayed                                                                                                                                                  | 16,039 genes<br>(80,598 hairpins) | 1,252                      | HeLa                                                                                                                                          | 1                          | ✓       |                                                                                                                                                                                                                                            |    |   |
|                             |                                                                                                                                                               |                                   | 244                        | A549                                                                                                                                          | 9                          | ✓       |                                                                                                                                                                                                                                            |    |   |
|                             |                                                                                                                                                               |                                   | 242                        | H1650                                                                                                                                         | 10                         | ✓       |                                                                                                                                                                                                                                            |    |   |
|                             |                                                                                                                                                               |                                   | 215                        | H187                                                                                                                                          | 11                         | ✓       |                                                                                                                                                                                                                                            |    |   |
|                             |                                                                                                                                                               |                                   | 233                        | H1975                                                                                                                                         | 12                         | ✓       |                                                                                                                                                                                                                                            |    |   |
|                             |                                                                                                                                                               |                                   | 234                        | H82                                                                                                                                           | 13                         | ✓       |                                                                                                                                                                                                                                            |    |   |
|                             |                                                                                                                                                               |                                   | 254                        | HCC827                                                                                                                                        | 14                         | ✓       |                                                                                                                                                                                                                                            |    |   |
|                             |                                                                                                                                                               |                                   | 247                        | JURKAT                                                                                                                                        | 15                         | ✓       |                                                                                                                                                                                                                                            |    |   |
|                             |                                                                                                                                                               |                                   | 245                        | K562                                                                                                                                          | 16                         | ✓       |                                                                                                                                                                                                                                            |    |   |
|                             |                                                                                                                                                               |                                   | 250                        | LN299                                                                                                                                         | 17                         | ✓       |                                                                                                                                                                                                                                            |    |   |
| Luo et al. <sup>61</sup>    | TRC, pooled                                                                                                                                                   | 9,500 genes<br>(45,000 hairpins)  | 251                        | REH                                                                                                                                           | 18                         | ✓       |                                                                                                                                                                                                                                            |    |   |
|                             |                                                                                                                                                               |                                   | 250                        | SUPT1                                                                                                                                         | 19                         | ✓       |                                                                                                                                                                                                                                            |    |   |
|                             |                                                                                                                                                               |                                   | 242                        | U2L                                                                                                                                           | 20                         | ✓       |                                                                                                                                                                                                                                            |    |   |
|                             |                                                                                                                                                               |                                   | 8                          | NOMO-1, Fibroblast, HMEC, THP-1                                                                                                               | 28                         | X       |                                                                                                                                                                                                                                            |    |   |
|                             |                                                                                                                                                               |                                   | Barbie et al. <sup>3</sup> | TRC, arrayed                                                                                                                                  | 957 genes (5,002 hairpins) | 45      | 786-O, A549, DLD-1, Fibroblast, HCT-116, HMEC-TERT, LN-229, LNCaP, MCF7, MDA-MB-231, MDA-MB-453, NOMO-1, OVCAR-8, PC-3, RPMI-8226, T47D, THP-1, TOV-21G, U87-MG                                                                            | 21 | X |
|                             |                                                                                                                                                               |                                   |                            |                                                                                                                                               |                            | 582     | 25 Ovarian cell lines<br>(A2780, Caov-3, Caov-4, COLO-704, COV362, COV434, COV504, EFO-21, EFO-27, Hey-A8, IGROV1, JHOC-5, KURAMOCHI, NIH:OVCAR-3, OV-90, OVCAR-4, OVCAR-8, OVISe, OVMANA, RKN, RMG-I, SNU-840, TOV-112D, TOV-21G, TYK-nu) | 22 | X |
| 567                         | 18 Colon cell lines<br>(C2BBE1, COLO-205, DLD-1, GP2d, HT-29, HT-55, HuTu80, KM12, LoVo, LS411N, LS513, NCI-H508, RKO, SK-CO-1, SNU-C1, SNU-C2A, SW48, SW480) | 23                                |                            |                                                                                                                                               |                            | X       |                                                                                                                                                                                                                                            |    |   |
| Cheung et al. <sup>11</sup> | TRC, pooled                                                                                                                                                   | 11,194 genes<br>(54,020 hairpins) | 588                        | 13 Pancreas cell lines<br>(AsPC-1, BxPC-3, CFPAC-1, HPAC, KP-1NL, KP4, L3.3, MIA PaCa-2, Panc 03.27, Panc 08.13, Panc 10.05, QGP-1, SU.86.86) | 24                         | X       |                                                                                                                                                                                                                                            |    |   |

|                                |                        |                                         |     |                                                                                                  |    |   |
|--------------------------------|------------------------|-----------------------------------------|-----|--------------------------------------------------------------------------------------------------|----|---|
|                                |                        |                                         | 594 | 8 NSCLC cell lines<br>(A549, HCC2814, HCC364, HCC827, NCI-H1650, NCI-H1975, NCI-H2122, NCI-H661) | 25 | X |
|                                |                        |                                         | 578 | 7 Esophageal Squamous cell lines (KYSE-150, KYSE-30, KYSE-450, KYSE-510, T.T, TE-15, TE-9)       | 26 | X |
|                                |                        |                                         | 584 | 6 GBM cell lines<br>(LN-215, LN-229, LN-319, LN-464, SF767, U-251 MG)                            | 27 | X |
| Silva et al. <sup>54</sup>     | Elledge-Hannon, pooled | 6,000 hairpins                          | 535 | MCF-10A, MDA-MB-435                                                                              | 2  | ✓ |
|                                |                        |                                         | 87  | DLD-1                                                                                            | 3  | ✓ |
| Schlabach et al. <sup>53</sup> | Elledge-Hannon, pooled | 2,294 genes<br>(8,203 hairpins)         | 155 | HCC1954                                                                                          | 4  | ✓ |
|                                |                        |                                         | 147 | HCT116                                                                                           | 5  | ✓ |
|                                |                        |                                         | 671 | HMEC                                                                                             | 6  | ✓ |
| Luo et al. <sup>52</sup>       | Elledge-Hannon, pooled | 32,293 transcripts<br>(74,905 hairpins) | 366 | DLD-1 (KRAS-mut)                                                                                 | 7  | ✓ |
|                                |                        |                                         |     | DLD-1 (KRAS-wt)                                                                                  | 8  | ✓ |
