# Supplementary material
Source: PubMed Central journal article supplement (PMC3619155)
Supplement: Supp_Table11.pdf [file Supp_Table11.pdf]

**Supplementary Table S11.** List of the 239 high confidence essential gene candidates

| Gene      | Refseq ID | Description                                               |
|-----------|-----------|-----------------------------------------------------------|
| ABCB7     | NM_004299 | ATP-binding cassette, sub-family B (MDR/TAP), member 7    |
| ABCD3     | NM_002858 | ATP-binding cassette, sub-family D (ALD), member 3        |
| ABLIM1    | NM_002313 | actin binding LIM protein 1                               |
| ACTL6A    | NM_177989 | actin-like 6A                                             |
| ADIPOR1   | NM_015999 | adiponectin receptor 1                                    |
| AGPAT1    | NM_006411 | 1-acylglycerol-3-phosphate O-acyltransferase 1            |
| ALDH16A1  | NM_153329 | aldehyde dehydrogenase 16 family, member A1               |
| AP1M1     | NM_032493 | adaptor-related protein complex 1, mu 1 subunit           |
| AP1S3     | NM_178814 | adaptor-related protein complex 1, sigma 3 subunit        |
| AP2A1     | NM_014203 | adaptor-related protein complex 2, alpha 1 subunit        |
| AP3B1     | NM_003664 | adaptor-related protein complex 3, beta 1 subunit         |
| AP3M2     | NM_006803 | adaptor-related protein complex 3, mu 2 subunit           |
| API5      | NM_006595 | apoptosis inhibitor 5                                     |
| APOO      | NM_024122 | apolipoprotein O                                          |
| ARCN1     | NM_001655 | archain 1 (ARCN1), mRNA                                   |
| ARD1A     | NM_003491 | ARD1 homolog A, N-acetyltransferase                       |
| ARFIP2    | NM_012402 | ADP-ribosylation factor interacting protein 2             |
| B3GAT3    | NM_012200 | beta-1,3-glucuronyltransferase 3                          |
| BCAT2     | NM_001190 | branched chain aminotransferase 2                         |
| C12ORF24  | NM_013300 | chromosome 12 open reading frame 24                       |
| C14ORF108 | NM_018229 | chromosome 14 open reading frame 108                      |
| C6ORF192  | NM_052831 | chromosome 6 open reading frame 192                       |
| CASC3     | NM_007359 | cancer susceptibility candidate 3                         |
| CAT       | NM_001752 | catalase                                                  |
| CBX5      | NM_012117 | chromobox homolog 5                                       |
| CC2D1A    | NM_017721 | coiled-coil and C2 domain containing 1A                   |
| CCDC28A   | NM_015439 | coiled-coil domain containing 28A                         |
| CCDC5     | NM_138443 | coiled-coil domain containing 5                           |
| CCT6A     | NM_001762 | chaperonin containing TCP1, subunit 6A (zeta 1)           |
| CD2BP2    | NM_006110 | CD2 (cytoplasmic tail) binding protein 2                  |
| CD44      | NM_000610 | CD44 molecule (Indian blood group)                        |
| CD81      | NM_004356 | CD81 molecule                                             |
| CDK10     | NM_003674 | cyclin-dependent kinase 10                                |
| CEACAM6   | NM_002483 | carcinoembryonic antigen-related cell adhesion molecule 6 |
| CENPA     | NM_001809 | centromere protein A                                      |
| CKAP5     | NM_014756 | cytoskeleton associated protein 5                         |
| COG2      | NM_007357 | component of oligomeric golgi complex 2                   |
| COPA      | NM_004371 | coatamer protein complex, subunit alpha                   |
| COPB2     | NM_004766 | coatamer protein complex, subunit beta 2 (beta prime)     |
| COPE      | NM_007263 | coatamer protein complex, subunit epsilon                 |
| COPS6     | NM_006833 | COP9 constitutive photomorphogenic homolog subunit 6      |
| COPZ2     | NM_016429 | coatamer protein complex, subunit zeta 2                  |
| COQ2      | NM_015697 | coenzyme Q2 homolog, prenyltransferase                    |
| COQ6      | NM_182476 | coenzyme Q6 homolog, monooxygenase                        |
| CSNK1E    | NM_001894 | casein kinase 1, epsilon                                  |
| CTHRC1    | NM_138455 | collagen triple helix repeat containing 1                 |
| CTNS      | NM_004937 | cystinosis, nephropathic                                  |
| CXADR     | NM_001338 | coxsackie virus and adenovirus receptor                   |
| CYBA      | NM_000101 | cytochrome b-245, alpha polypeptide                       |
| CYCS      | NM_018947 | cytochrome c, somatic                                     |
| CYP1A2    | NM_000761 | cytochrome P450, family 1, subfamily A, polypeptide 2     |
| CYP1B1    | NM_000104 | cytochrome P450, family 1, subfamily B, polypeptide 1     |
| CYP26A1   | NM_000783 | cytochrome P450, family 26, subfamily A, polypeptide 1    |
| CYTH2     | NM_017457 | cytohesin 2                                               |
| DCTN1     | NM_004082 | dynactin 1                                                |
| DEGS1     | NM_003676 | degenerative spermatocyte homolog 1, lipid desaturase     |
| DHX34     | NM_014681 | DEAH (Asp-Glu-Ala-His) box polypeptide 34                 |
| DLEU1     | NM_005887 | deleted in lymphocytic leukemia 1                         |
| DLGAP5    | NM_014750 | discs, large (Drosophila) homolog-associated protein 5    |
| DUS2L     | NM_017803 | dihydrouridine synthase 2-like, SMM1 homolog              |

|           |           |                                                                           |
|-----------|-----------|---------------------------------------------------------------------------|
| EBNA1BP2  | NM_006824 | EBNA1 binding protein 2                                                   |
| EFHD1     | NM_025202 | EF-hand domain family, member D1                                          |
| EFNA3     | NM_004952 | ephrin-A3                                                                 |
| EFNA4     | NM_005227 | ephrin-A4                                                                 |
| EHHADH    | NM_001966 | enoyl-Coenzyme A, hydratase/3-hydroxyacyl Coenzyme A dehydrogenase        |
| EIF1AX    | NM_001412 | eukaryotic translation initiation factor 1A                               |
| EIF4A3    | NM_014740 | eukaryotic translation initiation factor 4A                               |
| EIF4E     | NM_001968 | eukaryotic translation initiation factor 4E                               |
| EIF5B     | NM_015904 | eukaryotic translation initiation factor 5B                               |
| ERBB2IP   | NM_018695 | erbb2 interacting protein                                                 |
| ERGIC1    | NM_020462 | endoplasmic reticulum-golgi intermediate compartment 1                    |
| ETFA      | NM_000126 | electron-transfer-flavoprotein, alpha polypeptide                         |
| EXOC5     | NM_006544 | exocyst complex component 5                                               |
| EXOC6     | NM_019053 | exocyst complex component 6                                               |
| FADS1     | NM_013402 | fatty acid desaturase 1                                                   |
| FADS2     | NM_004265 | fatty acid desaturase 2                                                   |
| FAHD1     | NM_031208 | fumarylacetoacetate hydrolase domain containing 1                         |
| FEZ2      | NM_005102 | fasciculation and elongation protein zeta 2                               |
| FKBP3     | NM_002013 | FK506 binding protein 3                                                   |
| FLNB      | NM_001457 | filamin B, beta                                                           |
| FLNC      | NM_001458 | filamin C, gamma                                                          |
| GFOD2     | NM_030819 | glucose-fructose oxidoreductase domain containing 2                       |
| GGA3      | NM_014001 | golgi associated, gamma adaptin ear containing                            |
| GJA3      | NM_021954 | gap junction protein, alpha 3, 46kDa                                      |
| GLRX      | NM_002064 | glutaredoxin                                                              |
| GLRX2     | NM_016066 | glutaredoxin 2                                                            |
| GLRX3     | NM_006541 | glutaredoxin 3                                                            |
| GRB14     | NM_004490 | growth factor receptor-bound protein 14                                   |
| H2AFZ     | NM_002106 | H2A histone family, member Z                                              |
| H3F3B     | NM_005324 | H3 histone, family 3B                                                     |
| HDAC1     | NM_004964 | histone deacetylase 1                                                     |
| HFE       | NM_000410 | hemochromatosis                                                           |
| HINT2     | NM_032593 | histidine triad nucleotide binding protein 2                              |
| HLA-DPA1  | NM_033554 | major histocompatibility complex, class II, DP alpha 1                    |
| HNRNPM    | NM_005968 | heterogeneous nuclear ribonucleoprotein M                                 |
| HSDL2     | NM_032303 | hydroxysteroid dehydrogenase like 2                                       |
| IFT57     | NM_018010 | Intraflagellar transport 57 homolog                                       |
| IGFBP6    | NM_002178 | Insulin-like growth factor binding protein 6                              |
| IL13RA1   | NM_001560 | Interleukin 13 receptor, alpha 1                                          |
| ITPR3     | NM_002224 | Inositol 1,4,5-triphosphate receptor, type 3                              |
| KDELR1    | NM_006801 | KDEL (Lys-Asp-Glu-Leu) endoplasmic reticulum protein retention receptor 1 |
| KDELR2    | NM_006854 | KDEL (Lys-Asp-Glu-Leu) endoplasmic reticulum protein retention receptor 2 |
| KDELR3    | NM_006855 | KDEL (Lys-Asp-Glu-Leu) endoplasmic reticulum protein retention receptor 3 |
| KIAA0090  | NM_015047 | KIAA0090                                                                  |
| KLHL2     | NM_007246 | kelch-like 2, Mayven                                                      |
| KPNA1     | NM_002264 | karyopherin alpha 1 (importin alpha 5)                                    |
| KRAS      | NM_004985 | v-Ki-ras2 Kirsten rat sarcoma viral oncogene homolog                      |
| KRR1      | NM_007043 | Small subunit (SSU) processome component, homolog                         |
| KTN1      | NM_182926 | kinectin 1                                                                |
| L2HGDH    | NM_024884 | L-2-hydroxyglutarate dehydrogenase                                        |
| LAYN      | NM_178834 | layilin                                                                   |
| LMBR1L    | NM_018113 | limb region 1 homolog (mouse)-like                                        |
| LMNB2     | NM_032737 | lamin B2                                                                  |
| LOC389465 | NM_003142 | Sjogren syndrome antigen B                                                |
| LOC399942 | NM_006082 | tubulin, alpha 1b (TUBA1B), mRNA                                          |
| LRCH4     | NM_002319 | leucine-rich repeats and calponin homology (CH) domain containing 4       |
| LSM4      | NM_012321 | LSM4 homolog, U6 small nuclear RNA associated                             |
| LSM5      | NM_012322 | LSM5 homolog, U6 small nuclear RNA associated                             |
| LYAR      | NM_017816 | Ly1 antibody reactive homolo                                              |
| LYRM4     | NM_020408 | LYR motif containing 4                                                    |
| LYRM7     | NM_181705 | Lyrm7 homolog                                                             |
| MAGOHB    | NM_018048 | mago-nashi homolog B                                                      |
| MAGT1     | NM_032121 | magnesium transporter 1                                                   |

|          |              |                                                                             |
|----------|--------------|-----------------------------------------------------------------------------|
| MAPRE1   | NM_012325    | microtubule-associated protein, RP/EB family, member 1                      |
| MARVELD2 | NM_144724    | MARVEL domain containing 2                                                  |
| ME1      | NM_002395    | malic enzyme 1, NADP(+)-dependent, cytosolic                                |
| MED30    | NM_080651    | mediator complex subunit 30                                                 |
| METRN    | NM_024042    | meteorin, glial cell differentiation regulator                              |
| MGC4172  | NM_024308    | short-chain dehydrogenase/reductase                                         |
| MICB     | NM_005931    | MHC class I polypeptide-related sequence B                                  |
| MIER3    | NM_152622    | mesoderm induction early response 1, family member 3                        |
| MRPL12   | NM_002949    | mitochondrial ribosomal protein L12                                         |
| MRPL37   | NM_016491    | mitochondrial ribosomal protein L37                                         |
| MRPS16   | NM_016065    | mitochondrial ribosomal protein S16                                         |
| MSRB3    | NM_198080    | methionine sulfoxide reductase B3                                           |
| MTO1     | NM_012123    | mitochondrial translation optimization 1 homolog                            |
| MTUS1    | NM_001001924 | mitochondrial tumor suppressor 1                                            |
| NCOA7    | NM_181782    | nuclear receptor coactivator 7                                              |
| NCOR2    | NM_006312    | nuclear receptor co-repressor 2                                             |
| NDUFA12  | NM_018838    | NADH dehydrogenase 1 alpha subcomplex                                       |
| NDUFAF2  | NM_174889    | NADH dehydrogenase (ubiquinone) 1 alpha subcomplex, assembly factor 2       |
| NDUFS1   | NM_005006    | NADH dehydrogenase (ubiquinone) Fe-S protein 1                              |
| NOG      | NM_005450    | noggin                                                                      |
| NOLA2    | NM_017838    | nucleolar protein family A, member 2                                        |
| NPM1     | NM_002520    | nucleophosmin                                                               |
| NRP2     | NM_003872    | neuropilin 2                                                                |
| NUP85    | NM_024844    | nucleoporin 85kDa                                                           |
| NUP93    | NM_014669    | nucleoporin 93kDa                                                           |
| OGFOD2   | NM_024623    | 2-oxoglutarate and iron-dependent oxygenase domain containing 2             |
| PAFAH1B1 | NM_000430    | platelet-activating factor acetylhydrolase, isoform Ib, alpha subunit 45kDa |
| PAN2     | NM_014871    | PAN2 polyA specific ribonuclease subunit homolog                            |
| PAQR5    | NM_017705    | progesterin and adipoQ receptor family member V                             |
| PDCL     | NM_005388    | phosducin-like                                                              |
| PDGFD    | NM_025208    | platelet derived growth factor D                                            |
| PHB2     | NM_007273    | prohibitin 2                                                                |
| PIB5PA   | NM_001002837 | phosphatidylinositol (4,5) bisphosphate 5-phosphatase                       |
| PLK1     | NM_005030    | polo-like kinase 1                                                          |
| PLOD1    | NM_000302    | procollagen-lysine 1, 2-oxoglutarate 5-dioxygenase 1                        |
| PLOD3    | NM_001084    | procollagen-lysine, 2-oxoglutarate 5-dioxygenase 3                          |
| PLXND1   | NM_015103    | plexin D1                                                                   |
| POM121   | NM_172020    | POM121 membrane glycoprotein                                                |
| PPP2R2D  | NM_001003656 | protein phosphatase 2, regulatory subunit B, delta isoform                  |
| PPRC1    | NM_015062    | peroxisome proliferator-activated receptor gamma, coactivator-related 1     |
| PRDX2    | NM_005809    | peroxiredoxin 2                                                             |
| PRKD3    | NM_005813    | protein kinase D3 (PRKD3), mRNA                                             |
| PRPF18   | NM_003675    | PRP18 pre-mRNA processing factor 18 homolog                                 |
| PSMD1    | NM_002807    | proteasome 26S subunit                                                      |
| PTDSR    | NM_015167    | phosphatidylserine receptor                                                 |
| PVRL1    | NM_002855    | poliovirus receptor-related 1                                               |
| PVRL2    | NM_002856    | poliovirus receptor-related 2                                               |
| QSOX2    | NM_181701    | quiescin Q6 sulfhydryl oxidase 2                                            |
| QTRT1    | NM_031209    | queuine tRNA-ribosyltransferase 1                                           |
| RAN      | NM_006325    | RAN, member RAS oncogene family                                             |
| RFESD    | NM_173362    | Rieske (Fe-S) domain containing                                             |
| RFFL     | NM_057178    | ring finger and FYVE-like domain containing 1                               |
| ROR2     | NM_004560    | receptor tyrosine kinase-like orphan receptor 2                             |
| RPL3     | NM_000967    | ribosomal protein L3                                                        |
| RPL31    | NM_000993    | ribosomal protein L31                                                       |
| RPL6     | NM_000970    | ribosomal protein L6 (RPL6)                                                 |
| RPS18    | NM_022551    | ribosomal protein S18                                                       |
| RRAGD    | NM_021244    | Ras-related GTP binding D                                                   |
| SEC23A   | NM_006364    | Sec23 homolog A                                                             |
| SENP5    | NM_152699    | SUMO1/sentrin specific peptidase 5                                          |
| SEPT3    | NM_019106    | septin 3                                                                    |
| SEZ6L2   | NM_012410    | seizure related 6 homolog (mouse)-like 2                                    |
| SFRP1    | NM_003012    | secreted frizzled-related protein 1                                         |

|            |              |                                                                                                               |
|------------|--------------|---------------------------------------------------------------------------------------------------------------|
| SFRS4      | NM_005626    | splicing factor, arginine/serine-rich 4                                                                       |
| SGCB       | NM_000232    | sarcoglycan, beta                                                                                             |
| SMC1A      | NM_006306    | structural maintenance of chromosomes 1A                                                                      |
| SMC2       | NM_006444    | structural maintenance of chromosomes 2                                                                       |
| SNAPIN     | NM_012437    | SNAP-associated protein                                                                                       |
| SNRPB      | NM_198216    | small nuclear ribonucleoprotein polypeptides B and B1                                                         |
| SNRPE      | NM_003094    | small nuclear ribonucleoprotein polypeptide E                                                                 |
| SNX15      | NM_013306    | sorting nexin 15                                                                                              |
| SNX2       | NM_003100    | sorting nexin 2                                                                                               |
| SSR2       | NM_003145    | signal sequence receptor, beta                                                                                |
| ST6GALNAC6 | NM_013443    | ST6 (alpha-N-acetyl-neuraminyl-2,3-beta-galactosyl-1,3)-N-acetylgalactosaminide alpha-2,6-sialyltransferase 6 |
| STX4       | NM_004604    | syntaxin 4                                                                                                    |
| STX6       | NM_005819    | syntaxin 6                                                                                                    |
| STXBP2     | NM_006949    | syntaxin binding protein 2                                                                                    |
| SUPV3L1    | NM_003171    | suppressor of var1, 3-like 1                                                                                  |
| SURF1      | NM_003172    | surfeit 1                                                                                                     |
| SYTL2      | NM_032379    | synaptotagmin-like 2                                                                                          |
| TBC1D16    | NM_019020    | TBC1 domain family, member 16                                                                                 |
| TM9SF4     | NM_014742    | transmembrane 9 superfamily protein member 4                                                                  |
| TMED1      | NM_006858    | transmembrane emp24 protein transport domain containing 1                                                     |
| TMED2      | NM_006815    | transmembrane emp24 domain trafficking protein 2                                                              |
| TMED3      | NM_007364    | transmembrane emp24 protein transport domain containing 3                                                     |
| TMED5      | NM_016040    | transmembrane emp24 protein transport domain containing 5                                                     |
| TMED7      | NM_181836    | transmembrane emp24 protein transport domain containing 7                                                     |
| TMEM1      | NM_001001723 | transmembrane protein 1                                                                                       |
| TNFRSF21   | NM_014452    | tumor necrosis factor receptor superfamily, member 21                                                         |
| TOMM22     | NM_020243    | translocase of outer mitochondrial membrane 22 homolog                                                        |
| TPR        | NM_003292    | translocated promoter region                                                                                  |
| TRAPPC1    | NM_021210    | trafficking protein particle complex 1                                                                        |
| TRIB3      | NM_021158    | tribbles homolog 3                                                                                            |
| TRIM14     | NM_014788    | tripartite motif-containing 14                                                                                |
| TSPO       | NM_000714    | translocator protein                                                                                          |
| TUBG1      | NM_001070    | tubulin, gamma 1                                                                                              |
| TXN        | NM_003329    | thioredoxin                                                                                                   |
| TXNDC12    | NM_015913    | thioredoxin domain containing 12                                                                              |
| TXNDC14    | NM_015959    | thioredoxin domain containing 14                                                                              |
| TXNDC15    | NM_024715    | thioredoxin domain containing 15                                                                              |
| TXNDC17    | NM_032731    | thioredoxin domain containing 17                                                                              |
| TXNL4A     | NM_006701    | thioredoxin-like 4A                                                                                           |
| U2AF1      | NM_006758    | U2 small nuclear RNA auxiliary factor                                                                         |
| UAP1       | NM_003115    | UDP-N-acetylglucosamine pyrophosphorylase 1                                                                   |
| UCP2       | NM_003355    | uncoupling protein 2                                                                                          |
| UHRF1BP1   | NM_017754    | UHRF1 (ICBP90) binding protein 1                                                                              |
| UIMC1      | NM_016290    | ubiquitin interaction motif containing 1                                                                      |
| UQCRCQ     | NM_014402    | ubiquinol-cytochrome c reductase, complex III subunit VII                                                     |
| USO1       | NM_003715    | USO1 homolog, vesicle docking protein                                                                         |
| VAMP7      | NM_005638    | vesicle-associated membrane protein 7                                                                         |
| VPS26B     | NM_052875    | vacuolar protein sorting 26 homolog B                                                                         |
| VPS28      | NM_016208    | vacuolar protein sorting 28 homolog                                                                           |
| WDR54      | NM_032118    | WD repeat domain 54                                                                                           |
| WNT7B      | NM_058238    | wingless-type MMTV integration site family, member 7B                                                         |
| ZBED1      | NM_004729    | zinc finger, BED-type containing 1                                                                            |
| ZP3        | NM_007155    | zona pellucida glycoprotein 3                                                                                 |
