# Supplementary material
Source: PubMed Central journal article supplement (PMC3619155)

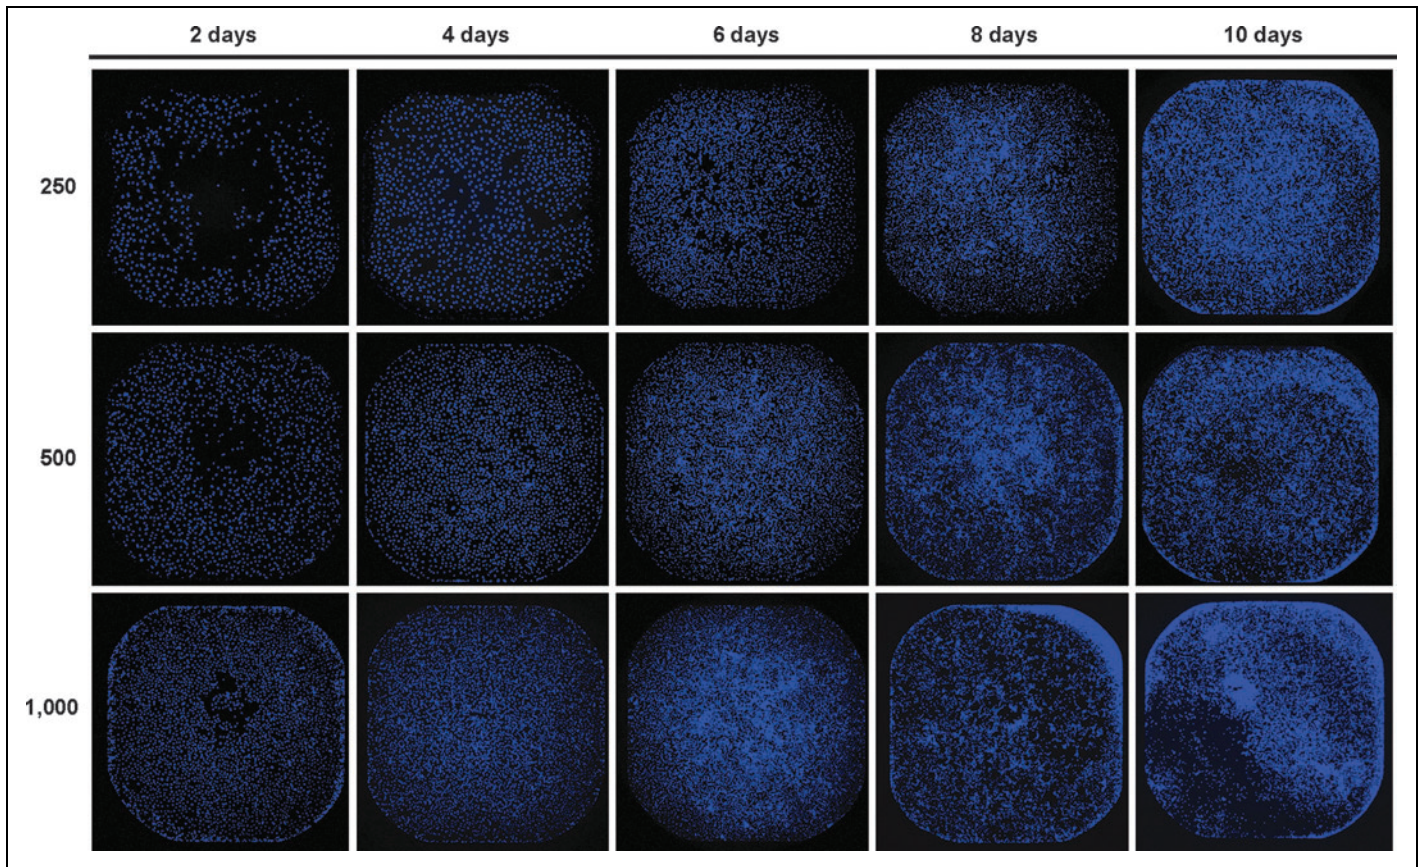

**Supplementary Fig. S1.** Whole-well images of HeLa cells growth kinetics.

Supplement: Supp_Fig1.pdf [file Supp_Fig1.pdf]
